# Supplementary material for: Association of serum high-sensitivity C reactive protein with risk of mortality in an Asian population: the Health Examinees cohort
Source: PubMed Central journal article supplement — BMJ Open. 2022 Jul 4;12(7):e052630. doi: 10.1136/bmjopen-2021-052630 (PMC9255402; doi:10.1136/bmjopen-2021-052630), 2022-07-04
Supplement: bmjopen-2021-052630.draft_revisions.pdf [file bmjopen-2021-052630.draft_revisions.pdf]

# BMJ Open

BMJ Open is committed to open peer review. As part of this commitment we make the peer review history of every article we publish publicly available.

When an article is published we post the peer reviewers' comments and the authors' responses online. We also post the versions of the paper that were used during peer review. These are the versions that the peer review comments apply to.

The versions of the paper that follow are the versions that were submitted during the peer review process. They are not the versions of record or the final published versions. They should not be cited or distributed as the published version of this manuscript.

BMJ Open is an open access journal and the full, final, typeset and author-corrected version of record of the manuscript is available on our site with no access controls, subscription charges or pay-per-view fees (<http://bmjopen.bmj.com>).

If you have any questions on BMJ Open's open peer review process please email [info.bmjopen@bmj.com](mailto:info.bmjopen@bmj.com)

# BMJ Open

## The association of serum high sensitivity C-reactive protein with the mortality risk in Asian: the Health Examinees cohort

|                               |                                                                                                                                                                                                                                                                                                                                                                                                                                                                                                   |
|-------------------------------|---------------------------------------------------------------------------------------------------------------------------------------------------------------------------------------------------------------------------------------------------------------------------------------------------------------------------------------------------------------------------------------------------------------------------------------------------------------------------------------------------|
| Journal:                      | <i>BMJ Open</i>                                                                                                                                                                                                                                                                                                                                                                                                                                                                                   |
| Manuscript ID                 | bmjopen-2021-052630                                                                                                                                                                                                                                                                                                                                                                                                                                                                               |
| Article Type:                 | Original research                                                                                                                                                                                                                                                                                                                                                                                                                                                                                 |
| Date Submitted by the Author: | 20-Apr-2021                                                                                                                                                                                                                                                                                                                                                                                                                                                                                       |
| Complete List of Authors:     | Lee, Sang-Ah; Kangwon National University School of Medicine, Preventive Medicine; Vanderbilt University Medical Center<br>Kwon, Sung Ok; Kangwon National University School of Medicine, Preventive Medicine<br>Park, Hyerim; Kangwon National University School of Medicine, Preventive Medicine<br>Shu, Xiao-Ou ; Vanderbilt University Medical Center<br>Lee, Jong-Koo; JW LEE Center for Global Medicine<br>Kang, Daehee; Seoul National University College of Medicine, Preventive Medicine |
| Keywords:                     | PREVENTIVE MEDICINE, EPIDEMIOLOGY, Cardiac Epidemiology < CARDIOLOGY                                                                                                                                                                                                                                                                                                                                                                                                                              |
|                               |                                                                                                                                                                                                                                                                                                                                                                                                                                                                                                   |

SCHOLARONE™  
Manuscripts

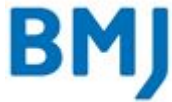

I, the Submitting Author has the right to grant and does grant on behalf of all authors of the Work (as defined in the below author licence), an exclusive licence and/or a non-exclusive licence for contributions from authors who are: i) UK Crown employees; ii) where BMJ has agreed a CC-BY licence shall apply, and/or iii) in accordance with the terms applicable for US Federal Government officers or employees acting as part of their official duties; on a worldwide, perpetual, irrevocable, royalty-free basis to BMJ Publishing Group Ltd ("BMJ") its licensees and where the relevant Journal is co-owned by BMJ to the co-owners of the Journal, to publish the Work in this journal and any other BMJ products and to exploit all rights, as set out in our [licence](#).

The Submitting Author accepts and understands that any supply made under these terms is made by BMJ to the Submitting Author unless you are acting as an employee on behalf of your employer or a postgraduate student of an affiliated institution which is paying any applicable article publishing charge ("APC") for Open Access articles. Where the Submitting Author wishes to make the Work available on an Open Access basis (and intends to pay the relevant APC), the terms of reuse of such Open Access shall be governed by a Creative Commons licence – details of these licences and which [Creative Commons](#) licence will apply to this Work are set out in our licence referred to above.

Other than as permitted in any relevant BMJ Author's Self Archiving Policies, I confirm this Work has not been accepted for publication elsewhere, is not being considered for publication elsewhere and does not duplicate material already published. I confirm all authors consent to publication of this Work and authorise the granting of this licence.

196 **The association of serum high sensitivity C-reactive protein with the mortality risk in**  
197 **Asian: the Health Examinees cohort**

200 **Sang-Ah Lee<sup>1,2\*</sup>, Sung Ok Kwon<sup>1</sup>, Hyerim Park<sup>1</sup>, Xiao-Ou Shu<sup>2</sup>, Jong-Koo Lee<sup>3</sup>, Daehee Kang<sup>4</sup>**

203 <sup>1</sup>Department of Preventive Medicine, School of Medicine, Kangwon National University, Chuncheon, Republic  
204 of Korea.

205 <sup>2</sup>Division of Epidemiology, Vanderbilt Epidemiology Center, Vanderbilt University Medical Center, Nashville,  
206 TN, USA.

207 <sup>3</sup>JW Lee Center for Global Medicine, College of Medicine, Seoul National University, Seoul, Republic of Korea.

208 <sup>4</sup>Department of Preventive Medicine, College of Medicine, Seoul National University, Seoul, Republic of Korea.

211 **ABSTRACT**

212 **Objectives** This study aimed to examine the association of *hsCRP* with mortality risk and the attenuated effect  
213 of non-communicable disease history (NCD<sub>history</sub>) on the association.

214 **Design** Prospective cohort study.

215 **Setting** the Health Examinees (HEXA) cohort.

216 **Participants** A total of 41 070 men and 81 011 women aged  $\geq 40$  years were involved (follow-up: 6.8 years).

217 **Outcome measures** The data and cause of death occurring until December 31, 2015, were confirmed by death  
218 statistics from the National Statistical Office. We conducted the advanced analysis after stratification by  
219 NCD<sub>history</sub> and the sensitivity analysis after excluding death before 1 or 2 years from recruitment. Cox  
220 proportional hazard and restricted cubic spline models were used to assess the association.

221 **Results** The association between serum *hsCRP* and the risk of all-cause mortality was observed with strong  
222 linearity in both genders, which was not influenced by NCD<sub>history</sub>. Otherwise, the association of serum *hsCRP*  
223 with cancer-mortality risk was not observed in women with NCD<sub>history</sub>, but the association with the risk of  
224 cardiovascular disease (CVD) mortality was predominantly observed in men with NCD<sub>history</sub>.

225 **Conclusions** This study suggested the dose-response association of *hsCRP* with mortality risk, including  
226 cancer and CVD mortality, in Korean with low serum *hsCRP*, although the association with cancer and CVD-  
227 mortality risk could be influenced by gender and NCD<sub>history</sub>.

230 **Strengths and limitations of this study**

- 231 • This is the large population-based prospective study.
- 232 • We examined the effect of very high *hsCRP* concentration on mortality risk.
- 233 • The *hsCRP* level of present study was measured within 18 hours in a single institution to minimize error/bias.

1  
2  
3  
4 234 · Due to due to random fluctuations of *hsCRP*, using the single measurement of *hsCRP* at baseline could reflect  
5  
6 235 the inaccurate status of blood *hsCRP* levels in the study participants and increase the instability of *hsCRP*.  
7  
8 236 · This study lacked information on medication use at recruitment and during the follow-up period, and  
9  
10 237 information on hormone-replacement therapy (HRT) among women.  
11  
12 238  
13 239

14 240 \*Correspondence to: Sang-Ah Lee, Ph.D.

15 241 Department of Preventive Medicine, School of Medicine, Kangwon National University,

16 242 Chuncheon, Gangwon, Republic of Korea.

17 243 Tel: +82 33 250 8871

18 244 E-mail: [sangahlee@kangwon.ac.kr](mailto:sangahlee@kangwon.ac.kr)  
19 245  
20  
21  
22  
23  
24  
25  
26  
27  
28  
29  
30  
31  
32  
33  
34  
35  
36  
37  
38  
39  
40  
41  
42  
43  
44  
45  
46  
47  
48  
49  
50  
51  
52  
53  
54  
55  
56  
57  
58  
59  
60

## 266 INTRODUCTION

267 High sensitivity C-reactive protein (*hsCRP*) is an acute-phase response protein synthesized by the liver and  
268 the most sensitive and dynamic marker of inflammation[1]. Since *hsCRP* has been reported as a candidate  
269 marker for generalized atherosclerosis and cardiovascular disease (CVD)[2], many studies[3-7] have  
270 investigated the role of *hsCRP* levels as a predictor of mortality risk. A recent meta-analysis[8] reported the  
271 predictable role of serum *hsCRP* on all-cause and CVD mortality in the general population. Nevertheless, it is  
272 controversial whether the predictable role of *hsCRP* could be applied to the risk of mortality in Asians, whose  
273 *hsCRP* levels are lower than those in individuals in Western countries.

274 Serum *hsCRP* represents a low-grade inflammation state that is generally involved in the process of aging[9].  
275 Several large cohorts, including Study of Women's Health Across the Nation (SWAN)[10], the Women's  
276 Health Study[11] and the Dallas Heart Study[12], reported significant differences in *hsCRP* levels by race and  
277 gender. In two studies of multiethnic populations residing in the USA[10, 13], the median *hsCRP* level in East  
278 Asians was less than half the concentration in Caucasians. Even among East Asian populations, the geometric  
279 mean of *hsCRP* levels varied depending on ethnic background[14]. In addition, a meta-analysis[11] reported  
280 the *hsCRP* levels among women of various ethnic groups living in the United States (from the Women's Health  
281 Study) on the association between *hsCRP* and the mortality risk; the association was observed in only men  
282 supported by the results from two cohort studies[15, 16] reported in Korea. On the other hand, the increased  
283 *hsCRP* may be influenced by comorbidity itself because inflammation has emerged as an important factor in the  
284 progression of non-communicable diseases (NCDs), including CVD[17], cancer[18], chronic obstructive  
285 pulmonary disease (COPD)[19], type 2 diabetes[20] and fractures[21], which contribute to increased morbidity  
286 and mortality.

287 This study aimed to examine the association of serum *hsCRP* with the risk of mortality in Koreans with low  
288 serum *hsCRP* and to evaluate the attenuated effect of non-communicable disease history ( $NCD_{history}$ ) on the  
289 association.

290

291

292

293

294

## 295 **METHODS**

### 296 **Study population**

297 Details on the main objectives, rationale, study design and baseline characteristics of the Health Examinees  
298 (HEXA) study have been published elsewhere[22]. Considering the homogeneity and comparability of  
299 participants, we created a qualified dataset called HEXA-G (Health Examinees-Gem) from previously published  
300 HEXA studies[23]. In the new HEXA-G data, a total of 141 968 participants remained after the exclusion of  
301 withdrawers ( $n=12$ ). In addition, 19 887 were excluded due to missing information ( $n=19 876$ ) or small sample  
302 size ( $n=11$ ) on any *hsCRP* components at the baseline survey. Ultimately, 122 081 subjects, including 41 070  
303 men and 81 011 women, remained in the final analysis (Fig. 1). All study participants provided informed  
304 consent prior to entering the study. The Institutional Review Board of the Seoul National University Hospital,  
305 Seoul, Korea, approved it for statistical analysis (IRB No. E-1503-103-657).

### 307 **Laboratory measurements**

308 After at least 10 hours of overnight fasting, blood samples were obtained in the morning. Bio-specimens  
309 included fasting blood samples that were collected in a serum separator tube and two ethylenediaminetetraacetic  
310 acid (EDTA) tubes. All samples were then transported to the National Biobank of Korea and stored for future  
311 research purposes within 18 hours. *hsCRP* was measured using a turbidimetric immunoassay (ADVIA 1650 and  
312 ADVIA 1800; Siemens Healthineers).

### 314 **Follow-up and ascertainment of mortality**

315 All-cause mortality was confirmed by death statistics from the National Statistical Office, which provided the  
316 data and causes of all deaths occurring through December 31, 2015. We added the mortality data from Statistics  
317 Korea to our dataset using each participant's unique identifier. Information on death and causes of death was  
318 obtained from a record link with the national death certificate files in Korea. The main outcome of interest was  
319 all-cause mortality (defined as death from any cause), including cancers and CVD mortality. The cause of death  
320 was classified according to the International Classification of Diseases, 10th revision (ICD-10). Deaths were  
321 coded as C00-C97 for cancer and I00-I99 for CVD.

322

### 323 **Baseline variables**

324 Trained interviewers collected information on demographic, socioeconomic and lifestyle factors.  
325 Anthropometric measurements were obtained using standardized methods. Body mass index (BMI) was  
326 calculated, and all participants were defined into four classes based on the World Health Organization  
327 classification of BMI for Asian adults[24]: underweight (BMI <18.5 kg/m<sup>2</sup>), normal (18.5 ≤ BMI <23.0 kg/m<sup>2</sup>),  
328 overweight (23.0 ≤ BMI <25.0 kg/m<sup>2</sup>), obesity (25.0 ≤ BMI <29.9 kg/m<sup>2</sup>), and severe obesity (BMI ≥30.0 kg/m<sup>2</sup>).  
329 The current study defined metabolic syndrome using the National Cholesterol Education Program Adult  
330 Treatment Panel III (NCEP-ATP III)[25], modified for the Asian guideline for waist circumference (WC ≥90 and  
331 ≥80 cm for men and women, respectively). Nonsmokers were defined as those who had smoked less than 400  
332 cigarettes over the course of their lifetime. Participants who had smoked were categorized into two groups:  
333 noncurrent (never/former) and current smoker. Noncurrent drinkers were defined as those who had never  
334 consumed an alcoholic drink over the course of their lifetime or those who had not consumed alcohol at  
335 recruitment, while current drinkers were defined as those who persisted in consuming alcohol. Regular exercise  
336 was classified into two groups (yes/no) as follows: “Do you currently engage in regular exercise strenuous enough  
337 to cause you to break into a sweat at least once per week?” Furthermore, considering the attenuated effect of the  
338 NCD<sub>history</sub> on the association between serum *hsCRP* and the risk of mortality, we performed advanced analysis  
339 after stratification by NCD<sub>history</sub>. We considered six main non-communicable diseases (hypertension, diabetes,  
340 hyperlipidemia, cancer, cardiovascular and cerebrovascular diseases, and respiratory disease) to classify healthy  
341 subjects vs. subjects with NCD<sub>history</sub>.

342

### 343 **Statistical analysis**

344 For the categorical analysis, we created nine categories based on the distribution of *hsCRP* levels in our  
345 population: ≤1.00 (reference group), 1.01-1.50, 1.51-2.00, 2.01-2.50, 2.51-3.00, 3.01-4.00, 4.01-6.00, 6.01-10.0,  
346 and >10.0 mg/L. For the advanced analysis after stratification by the NCD<sub>history</sub>, the *hsCRP* levels were  
347 categorized as ≤1.00, 1.01-2.00, 2.01-3.00, 3.01-10.0, and >10.0 mg/L because of the reduced sample size in  
348 each subgroup. The concentrations of *hsCRP* were log-transformed for analyses because of the skewed  
349 distribution.

350 We calculated a follow-up time for each subject starting from the date of interview until the date of death or  
351 December 31, 2015, whichever came first. Using age as the time scale, subjects enter the risk set at the age at  
352 which they completed the baseline questionnaire and exit at their event/censoring age. The associations of



1  
2  
3  
4 353 *hsCRP* and all-cause mortality, as well as cancer and CVD mortality, were analyzed by Cox proportional hazard  
5  
6 354 models (aHR) and included adjustment for age, gender, demographic factors (education, marital status, job, BMI  
7  
8 355 and *NCD<sub>history</sub>*), and lifestyle factors (smoking, alcohol consumption and exercise). In addition, we conducted a  
9  
10 356 sensitivity analysis to avoid latent period bias after excluding death before 1 year (aHR<sub>1year</sub>) or 2 years (aHR<sub>2year</sub>)  
11  
12 357 since recruitment. We employed restricted cubic splines (RCSs) to evaluate the possibility of complex (i.e.,  
13  
14 358 nonlinear) hazard functions[26] using continuous values of *hsCRP* (aHR<sub>continuous</sub>). We selected five *hsCRP*  
15  
16 359 concentration values as knots based on *hsCRP* concentration percentiles, tested the linear and nonlinear associa-  
17  
18 360 tions between knots using a cubic function, and presented the integrated graph smoothly. All statistical analyses  
19  
20 361 were performed using SAS version 9.3 (SAS Institute Inc., Cary, NC, USA) and RCS analysis was carried out  
21  
22 362 using the SAS LGTPHCURV9 macro. The *P*-values <0.05 were defined as indicating statistical significance.  
23  
24 363

#### 25 364 **Patient and public involvement**

26  
27 365 No patients and public were involved in the design, conducting, reporting, and dissemination plans of the present  
28  
29 366 study.  
30  
31 367

#### 32 368

#### 33 369 **RESULTS**

34  
35 370 The association of demographic and lifestyle factors with the risk of all-cause mortality is presented in Table  
36  
37 371 1. During the follow-up period (average 6.8 years), 1 365 men and 864 women died. The median levels of  
38  
39 372 *hsCRP* were 0.77 and 0.59 mg/L for men and women, respectively. The risk of all-cause mortality was inversely  
40  
41 373 associated with female gender (aHR=0.38), high educated (aHR=0.65), overweight (aHR=0.81) or obesity  
42  
43 374 (aHR=0.83), current alcohol consumption (aHR=0.81) and regular exercise (aHR=0.83), but was positively  
44  
45 375 associated with single marital status (aHR=1.23), *NCD<sub>history</sub>* (aHR=1.57), underweight (aHR=2.05) and current  
46  
47 376 smoking (aHR=1.97).  
48  
49 377

50  
51 378  
52  
53 379  
54  
55 380  
56  
57 381  
58  
59  
60

382 **Table 1.** Baseline characteristics of participants by all-cause mortality

|                                      | All<br>(n=122 081) | Death<br>(n=2229) | All-cause mortality |                     |
|--------------------------------------|--------------------|-------------------|---------------------|---------------------|
|                                      |                    |                   | Age,gender adjusted | adj HR <sup>a</sup> |
| Age                                  | 53.1 ± 8.3         | 59.7 ± 8.8        |                     |                     |
| Female                               | 66.4               | 38.8              | 0.40 (0.36-0.43)    | 0.38 (0.33-0.44)    |
| Education (≥10 year, %)              | 68.2               | 55.4              | 0.67 (0.60-0.75)    | 0.65 (0.56-0.75)    |
| Blue-colored worker <sup>b</sup> (%) | 32.3               | 33.8              | 1.46 (1.26-1.68)    | 1.16 (0.99-1.35)    |
| Marital status (single, %)           | 11.0               | 13.3              | 1.35 (1.19-1.54)    | 1.23 (1.07-1.40)    |
| NCD <sub>history</sub> (yes, %)      | 32.4               | 53.6              | 1.51 (1.39-1.65)    | 1.57 (1.42-1.72)    |
| Hypertension                         | 18.9               | 31.5              | 1.18 (1.08-1.30)    | 1.22 (1.11-1.35)    |
| Diabete                              | 6.5                | 17.1              | 1.81 (1.62-2.03)    | 1.77 (1.57-2.00)    |
| Hyperlipidemia                       | 9.2                | 7.6               | 0.73 (0.62-0.86)    | 0.78 (0.66-0.92)    |
| Cancer                               | 3.2                | 8.8               | 2.69 (2.31-3.12)    | 2.66 (2.27-3.11)    |
| Cerebral & cardiovascular disease    | 3.7                | 10.2              | 1.50 (1.30-1.73)    | 1.43 (1.23-1.66)    |
| Respiratory disease                  | 2.4                | 4.3               | 1.37 (1.12-1.68)    | 1.32 (1.06-1.64)    |
| Body mass index (%)                  |                    |                   |                     |                     |
| <18.5                                | 1.8                | 3.7               | 2.14 (1.69-2.69)    | 2.05 (1.61-2.62)    |
| 18.5-22.9                            | 38.1               | 34.9              | 1.00 (ref.)         | 1.00 (ref.)         |
| 23.0-24.9                            | 27.8               | 26.0              | 0.82 (0.73-0.91)    | 0.81 (0.72-0.91)    |
| 25.0-29.9                            | 29.5               | 32.5              | 0.90 (0.81-1.00)    | 0.83 (0.74-0.93)    |
| ≥ 30.0                               | 2.8                | 2.9               | 1.08 (0.83-1.39)    | 0.81 (0.61-1.08)    |
| <i>P</i> -trend                      |                    |                   | 0.0118              | <.0001              |
| Metabolic syndrome (yes, %)          | 22.0               | 28.4              | 1.13 (1.03-1.24)    | 1.07 (0.96-1.19)    |
| Current smoker (%)                   | 11.7               | 22.7              | 2.04 (1.79-2.33)    | 1.97 (1.71-2.27)    |
| Current drinker (%)                  | 44.0               | 43.8              | 0.86 (0.77-0.95)    | 0.81 (0.73-0.91)    |
| Regular exercise (yes, %)            | 53.4               | 49.1              | 0.76 (0.70-0.83)    | 0.83 (0.76-0.91)    |

383 NCD<sub>history</sub>: Non-communicable disease history384 <sup>a</sup> Adjusted for age, gender, education, job, marital status, BMI and non-communicable disease history385 <sup>b</sup> Compared to white-colored worker

386

387

388

389

390

391

392

393

394

1  
2  
3  
4 395 The risk of all-cause mortality was inclined with a dose-dependent pattern as increased serum *hsCRP* level  
5  
6 396 ( $P_{trend}<0.001$ , Supplement 1), regardless of gender ( $P_{trend}<0.001$  in both genders), even in the sensitivity analysis  
7  
8 397 ( $P_{trend}<0.001$  for  $aHR_{1year}$  in both genders). The increased risk of female mortality with increased *hsCRP* levels  
9  
10 398 was observed in both premenopausal ( $P_{trend}=0.020$ ) and postmenopausal women ( $P_{trend}<0.001$ ), although the  
11  
12 399 statistical significance in premenopausal women disappeared after sensitivity analysis ( $P_{trend}=0.150$  for  $aHR_{2year}$ ,  
13  
14 400 Supplement 1). The integrated graph, based on the restricted cubic spline analyses, indicated a strong and linear  
15  
16 401 association of serum *hsCRP* level with all-cause mortality in both genders ( $aHR_{continuous}=1.019$  and  $1.013$  in men  
17  
18 402 and women, respectively, Fig. 2 (a)).

19 403 The dose-response association between *hsCRP* level and the risk of all-cause mortality was not influenced by  
20  
21 404  $NCD_{history}$  (Supplement 2). After stratification by gender, however, the attenuated effect by  $NCD_{history}$  on the  
22  
23 405 association was observed only in women; the linearity of the relationship was observed in healthy women  
24  
25 406 ( $P_{trend}=0.001$  for  $aHR_{2year}$ ) but disappeared in women with  $NCD_{history}$ , particularly after sensitivity analysis with  
26  
27 407 the exclusion of a 2-year follow-up time ( $P_{trend}=0.084$  for  $aHR_{2year}$ ). Based on the restricted cubic spline  
28  
29 408 analyses, otherwise, the pattern of increase in the association was different depending on the  $NCD_{history}$  (Fig. 2  
30  
31 409 (b)(c)). In the healthy subjects, the risk of all-cause mortality was increased with a gradual slope (strength) until  
32  
33 410  $3.0$  mg/L *hsCRP*, with a very steep slope until  $4.5$  mg/L and finally with a reduced and flattened slope after  $4.5$   
34  
35 411 mg/L (Fig. 2 (b)). On the other hand, the slope of the association fluctuated as the *hsCRP* level increased in the  
36  
37 412 subjects with  $NCD_{history}$ ; the slope increased up to  $3.0$  mg/L *hsCRP* but decreased until  $4.5$  mg/L and rapidly  
38  
39 413 increased after  $4.5$  mg/L (Fig. 2 (c)).

40 414 The association of serum *hsCRP* with the risk of cancer-mortality was not influenced by  $NCD_{history}$   
41  
42 415 ( $P_{trend}<0.001$  regardless of  $NCD_{history}$ ) (Table 2). Otherwise, after stratification by gender, the association was  
43  
44 416 not observed in women with  $NCD_{history}$  ( $P_{trend}=0.856$ ); however, the association was not influenced by  $NCD_{history}$   
45  
46 417 in men ( $P_{trend}<0.001$  and  $0.002$  for  $aHR$  in both healthy and  $NCD_{history}$ ) (Table 2). Although the risk of CVD  
47  
48 418 mortality was linearly associated with increasing *hsCRP* levels, the association was dominant in men  
49  
50 419 ( $P_{trend}=0.002$ ) and in subjects with  $NCD_{history}$  ( $P_{trend}=0.001$ , Table 3) after stratified by gender and  $NCD_{history}$ ,  
51  
52 420 respectively. After stratification by gender and  $NCD_{history}$ , otherwise, the association only appeared in  
53  
54 421 individuals of both genders with  $NCD_{history}$  ( $P_{trend}=0.015$  and  $0.035$  in men and women with  $NCD_{history}$ ,  
55  
56 422 respectively); no association between *hsCRP* level and CVD mortality risk was found in either healthy men or  
57  
58 423 women.

**Table 2.** The association between serum *hs*CRP level and cancer-mortality by gender and non-communicable disease history (NCD<sub>history</sub>) at recruitment

|                 | Cancer-mortality |      |       |                     |                     | Healthy subjects at recruitment |       |       |                     |                     | Subjects with NCD <sub>history</sub> at recruitment |      |       |                     |                     |
|-----------------|------------------|------|-------|---------------------|---------------------|---------------------------------|-------|-------|---------------------|---------------------|-----------------------------------------------------|------|-------|---------------------|---------------------|
|                 | E                | MR   | aHR   | HR <sub>1year</sub> | HR <sub>2year</sub> | E                               | MR    | aHR   | HR <sub>1year</sub> | HR <sub>2year</sub> | E                                                   | MR   | aHR   | HR <sub>1year</sub> | HR <sub>2year</sub> |
| <b>Total</b>    |                  |      |       |                     |                     |                                 |       |       |                     |                     |                                                     |      |       |                     |                     |
| ≤1.00           | 590              | 10.9 | Ref   | Ref                 | Ref                 | 270                             | 7.9   | Ref   | Ref                 | Ref                 | 320                                                 | 16.3 | Ref   | Ref                 | Ref                 |
| 1.01-2.00       | 232              | 17.1 | 1.25  | 1.23                | 1.17                | 85                              | 13.4  | 1.43  | 1.40                | 1.31                | 147                                                 | 20.3 | 1.19  | 1.13                | 1.09                |
| 2.01-3.00       | 86               | 20.4 | 1.32  | 1.24                | 1.19                | 29                              | 16.0  | 1.38  | 1.34                | 1.35                | 57                                                  | 23.7 | 1.35  | 1.18                | 1.10                |
| 3.01-10.0       | 149              | 29.4 | 1.83  | 1.76                | 1.72                | 54                              | 24.8  | 2.22  | 2.07                | 2.01                | 95                                                  | 33.0 | 1.75  | 1.59                | 1.55                |
| >10.0           | 66               | 48.9 | 2.69  | 2.28                | 1.96                | 20                              | 30.6  | 1.85  | 1.59                | 1.57                | 46                                                  | 65.9 | 3.25  | 2.64                | 2.16                |
| <i>P</i> -trend |                  |      | <.001 | <.001               | <.001               |                                 |       | <.001 | <.001               | <.001               |                                                     |      | <.001 | <.001               | <.001               |
| <b>Men</b>      |                  |      |       |                     |                     |                                 |       |       |                     |                     |                                                     |      |       |                     |                     |
| ≤1.00           | 302              | 18.5 | Ref   | Ref                 | Ref                 | 169                             | 23.6  | Ref   | Ref                 | Ref                 | 133                                                 | 14.5 | Ref   | Ref                 | Ref                 |
| 1.01-2.00       | 144              | 26.6 | 1.36  | 1.36                | 1.32                | 95                              | 32.6  | 1.40  | 1.38                | 1.34                | 49                                                  | 19.7 | 1.31  | 1.34                | 1.31                |
| 2.01-3.00       | 59               | 34.7 | 1.45  | 1.31                | 1.19                | 40                              | 40.4  | 1.54  | 1.37                | 1.16                | 19                                                  | 26.7 | 1.29  | 1.22                | 1.26                |
| 3.01-10.0       | 111              | 52.7 | 2.17  | 2.10                | 2.00                | 77                              | 64.5  | 2.26  | 2.24                | 2.12                | 34                                                  | 37.3 | 1.98  | 1.80                | 1.70                |
| >10.0           | 50               | 82.9 | 3.13  | 2.66                | 2.34                | 38                              | 114.1 | 4.07  | 3.42                | 2.79                | 13                                                  | 46.1 | 1.58  | 1.40                | 1.56                |
| <i>P</i> -trend |                  |      | <.001 | <.001               | <.001               |                                 |       | <.001 | <.001               | <.001               |                                                     |      | 0.002 | 0.009               | 0.015               |
| <b>Women</b>    |                  |      |       |                     |                     |                                 |       |       |                     |                     |                                                     |      |       |                     |                     |
| ≤1.00           | 288              | 7.7  | Ref   | Ref                 | Ref                 | 137                             | 5.5   | Ref   | Ref                 | Ref                 | 151                                                 | 12.1 | Ref   | Ref                 | Ref                 |
| 1.01-2.00       | 88               | 10.8 | 1.13  | 1.08                | 0.99                | 36                              | 9.4   | 1.60  | 1.48                | 1.31                | 52                                                  | 12.1 | 0.86  | 0.86                | 0.81                |
| 2.01-3.00       | 27               | 10.7 | 1.16  | 1.17                | 1.2                 | 10                              | 9.1   | 1.48  | 1.50                | 1.47                | 17                                                  | 12.0 | 0.96  | 0.98                | 1.03                |
| 3.01-10.0       | 38               | 12.9 | 1.31  | 1.24                | 1.29                | 20                              | 15.8  | 2.58  | 2.48                | 2.57                | 18                                                  | 10.7 | 0.75  | 0.71                | 0.74                |
| >10.0           | 15               | 20.4 | 1.89  | 1.61                | 1.28                | 7                               | 18.9  | 2.16  | 1.75                | 1.42                | 8                                                   | 21.9 | 1.66  | 1.47                | 1.17                |
| <i>P</i> -trend |                  |      | 0.019 | 0.074               | 0.161               |                                 |       | <.001 | 0.001               | 0.002               |                                                     |      | 0.856 | 0.635               | 0.538               |

E: Number of death, MR: Mortality rate (10 000 person year), Ref: Reference

aHR: Adjusted for age, gender, education, job, marital status, BMI, non-communicable disease history, smoking, alcohol consumption and exercise

HR<sub>1year</sub>: aHR after exclude subjects who died within 1 yr f/u time

HR<sub>2year</sub>: aHR after exclude subjects who died within 2 yr f/u time

**Table 3.** The association between serum *hs*CRP level and cardiovascular disease mortality by gender and non-communicable disease history (NCD<sub>history</sub>) at recruitment

|                 | Cardiovascular disease mortality |      |       |                     |                     | Healthy subjects at recruitment |      |       |                     |                     | Subjects with NCD <sub>history</sub> at recruitment |      |       |                     |                     |
|-----------------|----------------------------------|------|-------|---------------------|---------------------|---------------------------------|------|-------|---------------------|---------------------|-----------------------------------------------------|------|-------|---------------------|---------------------|
|                 | E                                | MR   | aHR   | HR <sub>1year</sub> | HR <sub>2year</sub> | E                               | MR   | aHR   | HR <sub>1year</sub> | HR <sub>2year</sub> | E                                                   | MR   | aHR   | HR <sub>1year</sub> | HR <sub>2year</sub> |
| <b>Total</b>    |                                  |      |       |                     |                     |                                 |      |       |                     |                     |                                                     |      |       |                     |                     |
| ≤1.00           | 167                              | 3.1  | Ref   | Ref                 | Ref                 | 58                              | 1.7  | Ref   | Ref                 | Ref                 | 109                                                 | 5.5  | Ref   | Ref                 | Ref                 |
| 1.01-2.00       | 79                               | 5.8  | 1.35  | 1.37                | 1.23                | 18                              | 2.8  | 1.19  | 1.15                | 0.94                | 64                                                  | 8.4  | 1.42  | 1.46                | 1.36                |
| 2.01-3.00       | 42                               | 10.0 | 2.06  | 2.05                | 2.02                | 6                               | 3.3  | 1.47  | 1.54                | 1.46                | 36                                                  | 15.0 | 2.28  | 2.25                | 2.26                |
| 3.01-10.0       | 39                               | 7.7  | 1.45  | 1.38                | 1.44                | 8                               | 3.7  | 1.44  | 1.50                | 1.70                | 31                                                  | 1.08 | 1.48  | 1.37                | 1.40                |
| >10.0           | 13                               | 9.6  | 1.81  | 1.76                | 1.59                | 3                               | 4.6  | 2.02  | 2.10                | 1.58                | 10                                                  | 14.3 | 1.85  | 1.74                | 1.68                |
| <i>P</i> -trend |                                  |      | 0.001 | 0.002               | 0.004               |                                 |      | 0.130 | 0.100               | 0.162               |                                                     |      | 0.001 | 0.006               | 0.009               |
| <b>Men</b>      |                                  |      |       |                     |                     |                                 |      |       |                     |                     |                                                     |      |       |                     |                     |
| ≤1.00           | 89                               | 5.5  | Ref   | Ref                 | Ref                 | 25                              | 2.7  | Ref   | Ref                 | Ref                 | 64                                                  | 8.9  | Ref   | Ref                 | Ref                 |
| 1.01-2.00       | 45                               | 8.3  | 1.33  | 1.32                | 1.25                | 12                              | 4.8  | 1.30  | 1.22                | 1.22                | 33                                                  | 11.3 | 1.31  | 1.33                | 1.33                |
| 2.01-3.00       | 30                               | 17.6 | 2.70  | 2.67                | 2.53                | 3                               | 4.2  | 1.31  | 1.37                | 1.37                | 27                                                  | 27.3 | 3.05  | 2.99                | 2.99                |
| 3.01-10.0       | 24                               | 11.4 | 1.43  | 1.36                | 1.46                | 6                               | 6.6  | 1.70  | 1.79                | 1.79                | 18                                                  | 15.1 | 1.42  | 1.21                | 1.21                |
| >10.0           | 8                                | 13.0 | 1.90  | 2.02                | 1.70                | 3                               | 10.6 | 3.42  | 3.61                | 3.61                | 5                                                   | 15.0 | 1.59  | 1.62                | 1.62                |
| <i>P</i> -trend |                                  |      | 0.002 | 0.003               | 0.009               |                                 |      | 0.053 | 0.038               | 0.062               |                                                     |      | 0.015 | 0.027               | 0.047               |
| <b>Women</b>    |                                  |      |       |                     |                     |                                 |      |       |                     |                     |                                                     |      |       |                     |                     |
| ≤1.00           | 78                               | 2.1  | Ref   | Ref                 | Ref                 | 33                              | 1.3  | Ref   | Ref                 | Ref                 | 45                                                  | 6.3  | Ref   | Ref                 | Ref                 |
| 1.01-2.00       | 34                               | 4.2  | 1.41  | 1.46                | 1.25                | 6                               | 1.6  | 1.09  | 1.13                | 0.62                | 28                                                  | 9.6  | 1.60  | 1.66                | 1.58                |
| 2.01-3.00       | 12                               | 4.8  | 1.26  | 1.30                | 1.44                | 3                               | 2.7  | 1.65  | 1.70                | 1.86                | 9                                                   | 9.1  | 1.17  | 1.20                | 1.39                |
| 3.01-10.0       | 15                               | 5.1  | 1.51  | 1.45                | 1.44                | 2                               | 1.6  | 1.06  | 1.07                | 1.14                | 13                                                  | 10.9 | 1.75  | 1.64                | 1.65                |
| >10.0           | 5                                | 6.8  | 1.72  | 1.35                | 1.45                | 0                               | -    | -     | -                   | -                   | 5                                                   | 15.0 | 2.51  | 1.91                | 2.07                |
| <i>P</i> -trend |                                  |      | 0.092 | 0.177               | 0.168               |                                 |      | 0.940 | 0.998               | 0.922               |                                                     |      | 0.035 | 0.092               | 0.078               |

E: Number of death, MR: Mortality rate (10 000 person year), Ref: Reference  
aHR: Adjusted for age, gender, education, job, marital status, BMI, non-communicable disease history, smoking, alcohol consumption and exercise  
HR<sub>1year</sub>: aHR after exclude subjects who died within 1 yr f/u time  
HR<sub>2year</sub>: aHR after exclude subjects who died within 2 yr f/u time

## 424 DISCUSSION

425 This study suggests that the risk of all-cause mortality was associated with elevated *hsCRP* levels with a  
426 dose-response manner in both gender among Asian who have reported low *hsCRP* levels compared to other  
427 races, and was not influenced by  $NCD_{history}$ . Otherwise, the association was influenced by gender and  $NCD_{history}$   
428 although a dose-response association of *hsCRP* with the risk of cancer- and CVD-mortality was also observed in  
429 this population. The level of *hsCRP* was not associated with the risk of cancer- mortality among women with  
430  $NCD_{history}$ . The risk effect of high *hsCRP* level on CVD mortality was predominantly observed in men with  
431  $NCD_{history}$ .

432 Several large cohorts[10-12, 14] have suggested that serum *hsCRP* levels may differ according to ethnic  
433 background, with the highest concentrations seen in African Americans, followed by Hispanic, White, Chinese  
434 and Japanese individuals. Although the reason for this ethnic difference is not clearly resolved, genetic  
435 diversity[27], the relatively low BMI in Asian populations and ethnic differences in diet and lifestyle[28] have  
436 been suggested. Although the extent to which these findings adopt to Asian populations has been unclear,  
437 several recent studies[11, 16] conducted in Asia reported a positive association of *hsCRP* with mortality risk.  
438 In this population, the *hsCRP* level was associated with the risk of all-cause mortality in a dose-dependent  
439 manner, even though the level of *hsCRP* was lower than that in the western population. A meta-analysis[29] and  
440 large cohort studies[3-6] supported the robustness of the association regardless of adjusted confounders, the cut-  
441 off point of CRP level and exclusion deaths within the first 2 years of follow-up.

442 The reason for the discrepancy in *hsCRP* levels with respect to gender is not clearly resolved, although  
443 several studies suggested different lifestyle and metabolic risk factors between men and women[30] and genetic  
444 diversity[27]. A high level of serum *hsCRP* in our population was positively related to the increased risk of all-  
445 cause mortality in both genders, supported by several previous studies[8, 16, 31]. Nevertheless, several studies  
446 reported no association of *hsCRP* levels with all-cause mortality was observed in women[7, 16]. In particular,  
447 the association was shown in postmenopausal women only, which might suggest the protective effect of  
448 endogenous female hormones on the low level of *hsCRP*[32]; the average *hsCRP* level was 0.48 and 0.68 mg/L  
449 for premenopausal and postmenopausal women in this study. The protective effect could be supported by the  
450 proposition that estrogen or progesterone might to some extent repress the detrimental effects of chronic  
451 inflammation on tissue damage[33].

452 Inflammation has emerged as an important factor in the processes of NCD, including CVD[17], cancer[18],  
453 type 2 diabetes[20], COPD[19, 34] and fracture[21]. In addition, medications that had taken to treat any specific

1  
2  
3  
4 454 NCD, such as rennin–angiotensin system inhibitors[35] and statins and thiazolidinedione[36], could influence  
5  
6 455 the level of *hsCRP*. The association between *hsCRP* and the mortality risk was not attenuated by  $NCD_{history}$  in  
7  
8 456 either gender in this study, but the statistical significance of the association disappeared in women after  
9  
10 457 sensitivity analysis ( $aHR_{2year}$ ). A dose-response relationship between *hsCRP* level and all-cause mortality risk  
11  
12 458 was pronounced in both genders. On the other hand, the positive association of *hsCRP* with the risk of all-cause  
13  
14 459 mortality risk was significantly observed in only men with  $NCD_{history}$  but not in women with  $NCD_{history}$ . The  
15  
16 460 attenuated effect of  $NCD_{history}$  on the association between *hsCRP* and the risk of cancer-mortality was not  
17  
18 461 observed in men, consistent with results from several studies which reported the associations among healthy  
19  
20 462 men[3] or cancer patients[37, 38] only. Most studies[3, 4, 6, 7, 15, 16, 31, 39] supported that CVD mortality  
21  
22 463 increased with elevated *hsCRP* levels, predominantly in men[4, 7, 15, 16]. Although *hsCRP* levels are lower in  
23  
24 464 our population than in other races, the level of *hsCRP* was positively associated with CVD mortality in men but  
25  
26 465 not in women, similar to previous studies[7, 15, 16, 31, 39]. After stratification by gender and  $NCD_{history}$ , the  
27  
28 466 association between *hsCRP* and the risk of CVD mortality was dominant in subjects with  $NCD_{history}$  in this  
29  
30 467 study.

31 468 This study has several strengths because of the large population-based prospective study; it makes possible 1)  
32  
33 469 to adjust for confounders; 2) to examine sensitivity analysis after excluding death before 1 or 2 years from  
34  
35 470 recruitment; 3) to assess an advanced analysis after stratification by gender and  $NCD_{history}$ ; 4) to examine the  
36  
37 471 association using various cut-off points of *hsCRP* considering low serum *hsCRP* levels in Asian populations;  
38  
39 472 and 5) to evaluate the complex (i.e., nonlinear) hazard functions using restricted cubic splines on the association  
40  
41 473 between continuous *hsCRP* levels and the risk of mortality. In particular, most previous studies excluded  
42  
43 474 subjects with more than 10 mg/L *hsCRP* because of their relatively low sample size or reflecting acute phase  
44  
45 475 reactions of severe inflammation, but we examined the effect of very high *hsCRP* concentration on the risk of  
46  
47 476 mortality because it is possible to be more concerning for these subjects in the future. The *hsCRP* level of this  
48  
49 477 study, in addition, was measured within 18 hours in a single institution to minimize measurement error/bias  
50  
51 478 from institutional variation to avoid bias from measurement or long-term storage before analysis.

52 479 Despite of those strengths, it is also has several limitations. First, the use of a single measurement of *hsCRP* at  
53  
54 480 baseline could reflect the inaccurate status of blood *hsCRP* levels in the study participants and increase the  
55  
56 481 instability of *hsCRP* due to random fluctuations over time. Nevertheless, a report [40] on the long-term *hsCRP*  
57  
58 482 variability suggested that the *hsCRP* variability within individual is relatively small and that the variability  
59  
60 483 could not account for the association. Second, our study lacked information on medication use at recruitment

1  
2  
3  
4 484 and during the follow-up period. Several medications related to NCDs, including statins, angiotensin-converting  
5  
6 485 enzyme inhibitors, fibrates, niacin, thiazolidinedione and estrogen/progestogen hormone, could influence the  
7  
8 486 *hsCRP* level[37]; however, we tried to overcome this limitation through advanced analysis after stratification by  
9  
10 487 *NCD<sub>history</sub>*. Third, because there is no available information on hormone-replacement therapy (HRT) among  
11  
12 488 women, which could not examine the influence of HRT on the association of *hsCRP* with the risk of hormone-  
13  
14 489 related cancer or CVD mortality among women, we could not suggest the effect of female hormones on the  
15  
16 490 association.

17  
18 491 In conclusion, the association of *hsCRP* level is dose-responsively increased with the risk of all-cause  
19  
20 492 mortality in men and women (particularly postmenopausal women), which was not influenced by the association  
21  
22 493 was not observed in women with *NCD<sub>history</sub>*. Otherwise, the association of *hsCRP* level with the risk of cancer-  
23  
24 494 and CVD-mortality could be attenuated by gender or *NCD<sub>history</sub>*.

25 495

26 496

#### 27 497 **Contributors**

28  
29  
30 498 SAL, XS and DK: designed and conducted the research, SAL and SOK: analyzed the data and performed the  
31  
32 499 statistical analyses; HP and JKL: managed data mining and collection; SAL: wrote the manuscript and had primary  
33  
34 500 responsibility for the final content of the manuscript; and all authors: read and approved the final manuscript.

35 501

36  
37  
38  
39 502 **Funding** None.

40 503

41  
42  
43 504 **Competing interests** None declared.

44 505

45  
46  
47  
48 506 **Patient consent for publication** Not required.

49 507

50  
51  
52  
53 508 **Ethics approval** The Institutional Review Board of the Seoul National University Hospital, Seoul, Korea,  
54  
55 509 approved it for statistical analysis (IRB No. E-1503-103-657).

56 510

57  
58  
59 511 **Provenance and peer review** Not commissioned; externally peer reviewed.

60



1  
2  
3  
4 512 **Data availability statement**

5  
6 513 No additional data available.  
7  
8 514  
9  
10 515

11  
12 516 **REFERENCES**

- 13 517 1 Pepys MB, Hirschfield GM. C-reactive protein: a critical update. *The Journal of clinical*  
14 518 *investigation* 2003;**111**:1805-12.
- 15  
16 519 2 Elias-Smale SE, Kardys I, Oudkerk M, *et al.* C-reactive protein is related to extent and  
17 520 progression of coronary and extra-coronary atherosclerosis; results from the Rotterdam study.  
18 521 *Atherosclerosis* 2007;**195**:e195-202.
- 19  
20 522 3 Koenig W, Khuseyinova N, Baumert J, *et al.* Prospective study of high-sensitivity C-reactive  
21 523 protein as a determinant of mortality: results from the MONICA/KORA Augsburg Cohort Study,  
22 524 1984-1998. *Clinical chemistry* 2008;**54**:335-42.
- 23  
24 525 4 Ahmadi-Abhari S, Luben RN, Wareham NJ, *et al.* Seventeen year risk of all-cause and  
25 526 cause-specific mortality associated with C-reactive protein, fibrinogen and leukocyte count in men  
26 527 and women: the EPIC-Norfolk study. *European journal of epidemiology* 2013;**28**:541-50.
- 27  
28 528 5 Kuoppamaki M, Salminen M, Vahlberg T, *et al.* High sensitive C-reactive protein (hsCRP),  
29 529 cardiovascular events and mortality in the aged: a prospective 9-year follow-up study. *Archives of*  
30 530 *gerontology and geriatrics* 2015;**60**:112-7.
- 31  
32 531 6 Zuo H, Ueland PM, Ulvik A, *et al.* Plasma Biomarkers of Inflammation, the Kynurenine  
33 532 Pathway, and Risks of All-Cause, Cancer, and Cardiovascular Disease Mortality: The Hordaland  
34 533 Health Study. *American journal of epidemiology* 2016;**183**:249-58.
- 35  
36 534 7 Nisa H, Hirata A, Kohno M, *et al.* High-Sensitivity C-Reactive Protein and Risks of All-  
37 535 Cause and Cause-Specific Mortality in a Japanese Population. *Asian Pacific journal of cancer*  
38 536 *prevention : APJCP* 2016;**17**:2643-8.
- 39  
40 537 8 Li Y, Zhong X, Cheng G, *et al.* Hs-CRP and all-cause, cardiovascular, and cancer mortality  
41 538 risk: A meta-analysis. *Atherosclerosis* 2017;**259**:75-82.
- 42  
43 539 9 Vasto S, Candore G, Balistreri CR, *et al.* Inflammatory networks in ageing, age-related  
44 540 diseases and longevity. *Mechanisms of ageing and development* 2007;**128**:83-91.
- 45  
46 541 10 Kelley-Hedgpeath A, Lloyd-Jones DM, Colvin A, *et al.* Ethnic differences in C-reactive  
47 542 protein concentrations. *Clinical chemistry* 2008;**54**:1027-37.
- 48  
49 543 11 Albert MA, Glynn RJ, Buring J, *et al.* C-reactive protein levels among women of various  
50 544 ethnic groups living in the United States (from the Women's Health Study). *The American journal of*  
51 545 *cardiology* 2004;**93**:1238-42.  
52  
53  
54  
55  
56  
57  
58  
59  
60

- 1  
2  
3  
4 546 12 Khera A, McGuire DK, Murphy SA, *et al.* Race and gender differences in C-reactive protein  
5 547 levels. *Journal of the American College of Cardiology* 2005;**46**:464-9.
- 6  
7 548 13 Lakoski SG, Cushman M, Criqui M, *et al.* Gender and C-reactive protein: data from the  
8 549 Multiethnic Study of Atherosclerosis (MESA) cohort. *American heart journal* 2006;**152**:593-8.
- 9  
10 550 14 Matthews KA, Sowers MF, Derby CA, *et al.* Ethnic differences in cardiovascular risk factor  
11 551 burden among middle-aged women: Study of Women's Health Across the Nation (SWAN). *American*  
12 552 *heart journal* 2005;**149**:1066-73.
- 13  
14  
15 553 15 Lee JH, Yeom H, Kim HC, *et al.* C-reactive Protein Concentration Is Associated With a  
16 554 Higher Risk of Mortality in a Rural Korean Population. *Journal of preventive medicine and public*  
17 555 *health = Yebang Uihakhoe chi* 2016;**49**:275-87.
- 18  
19 556 16 Sung KC, Ryu S, Chang Y, *et al.* C-reactive protein and risk of cardiovascular and all-cause  
20 557 mortality in 268 803 East Asians. *European heart journal* 2014;**35**:1809-16.
- 21  
22  
23 558 17 Kengne AP, Batty GD, Hamer M, *et al.* Association of C-reactive protein with  
24 559 cardiovascular disease mortality according to diabetes status: pooled analyses of 25,979 participants  
25 560 from four U.K. prospective cohort studies. *Diabetes care* 2012;**35**:396-403.
- 26  
27  
28 561 18 Heikkila K, Ebrahim S, Lawlor DA. A systematic review of the association between  
29 562 circulating concentrations of C reactive protein and cancer. *Journal of epidemiology and community*  
30 563 *health* 2007;**61**:824-33.
- 31  
32  
33 564 19 Dahl M, Vestbo J, Lange P, *et al.* C-reactive protein as a predictor of prognosis in chronic  
34 565 obstructive pulmonary disease. *American journal of respiratory and critical care medicine*  
35 566 2007;**175**:250-5.
- 36  
37  
38 567 20 Wang X, Bao W, Liu J, *et al.* Inflammatory markers and risk of type 2 diabetes: a systematic  
39 568 review and meta-analysis. *Diabetes care* 2013;**36**:166-75.
- 40  
41 569 21 Ishii S, Cauley JA, Greendale GA, *et al.* C-reactive protein, bone strength, and nine-year  
42 570 fracture risk: data from the Study of Women's Health Across the Nation (SWAN). *Journal of bone*  
43 571 *and mineral research : the official journal of the American Society for Bone and Mineral Research*  
44 572 2013;**28**:1688-98.
- 45  
46  
47 573 22 Kim Y, Han BG, Ko GESg. Cohort Profile: The Korean Genome and Epidemiology Study  
48 574 (KoGES) Consortium. *International journal of epidemiology* 2017;**46**:1350.
- 49  
50 575 23 Shin S, Lee HW, Kim CE, *et al.* Egg Consumption and Risk of Metabolic Syndrome in  
51 576 Korean Adults: Results from the Health Examinees Study. *Nutrients* 2017;**9**.
- 52  
53 577 24 Pan WH, Yeh WT. How to define obesity? Evidence-based multiple action points for public  
54 578 awareness, screening, and treatment: an extension of Asian-Pacific recommendations. *Asia Pacific*  
55 579 *journal of clinical nutrition* 2008;**17**:370-4.
- 56  
57  
58 580 25 National Cholesterol Education Program Expert Panel on Detection E, Treatment of High  
59 581 Blood Cholesterol in A. Third Report of the National Cholesterol Education Program (NCEP) Expert

- 1  
2  
3  
4 582 Panel on Detection, Evaluation, and Treatment of High Blood Cholesterol in Adults (Adult Treatment  
5 Panel III) final report. *Circulation* 2002;**106**:3143-421.
- 6 583  
7 584 26 Heinzl H, Kaider A. Gaining more flexibility in Cox proportional hazards regression models  
8 with cubic spline functions. *Computer methods and programs in biomedicine* 1997;**54**:201-8.
- 9 585  
10 586 27 MacGregor AJ, Gallimore JR, Spector TD, *et al.* Genetic effects on baseline values of C-  
11 reactive protein and serum amyloid a protein: a comparison of monozygotic and dizygotic twins.  
12 *Clinical chemistry* 2004;**50**:130-4.
- 13 588  
14 589 28 Ledue TB, Rifai N. Preanalytic and analytic sources of variations in C-reactive protein  
15 measurement: implications for cardiovascular disease risk assessment. *Clinical chemistry*  
16 2003;**49**:1258-71.
- 17 590  
18 591 29 Emerging Risk Factors C, Kaptoge S, Di Angelantonio E, *et al.* C-reactive protein  
19 concentration and risk of coronary heart disease, stroke, and mortality: an individual participant meta-  
20 analysis. *Lancet* 2010;**375**:132-40.
- 21 592  
22 593 30 Lee YJ, Lee JH, Shin YH, *et al.* Gender difference and determinants of C-reactive protein  
23 level in Korean adults. *Clinical chemistry and laboratory medicine* 2009;**47**:863-9.
- 24 594  
25 595 31 Doran B, Zhu W, Muennig P. Gender differences in cardiovascular mortality by C-reactive  
26 protein level in the United States: evidence from the National Health and Nutrition Examination  
27 Survey III. *American heart journal* 2013;**166**:45-51.
- 28 597  
29 598 32 Gaskins AJ, Wilchesky M, Mumford SL, *et al.* Endogenous reproductive hormones and C-  
30 reactive protein across the menstrual cycle: the BioCycle Study. *American journal of epidemiology*  
31 2012;**175**:423-31.
- 32 600  
33 601 33 Gilliver SC. Sex steroids as inflammatory regulators. *The Journal of steroid biochemistry*  
34 and molecular biology 2010;**120**:105-15.
- 35 602  
36 603 34 Man SF, Connett JE, Anthonisen NR, *et al.* C-reactive protein and mortality in mild to  
37 moderate chronic obstructive pulmonary disease. *Thorax* 2006;**61**:849-53.
- 38 604  
39 605 35 Di Napoli M, Papa F. Angiotensin-converting enzyme inhibitor use is associated with  
40 reduced plasma concentration of C-reactive protein in patients with first-ever ischemic stroke. *Stroke*  
41 2003;**34**:2922-9.
- 42 606  
43 607 36 Sidhu JS, Cowan D, Kaski JC. The effects of rosiglitazone, a peroxisome proliferator-  
44 activated receptor-gamma agonist, on markers of endothelial cell activation, C-reactive protein, and  
45 fibrinogen levels in non-diabetic coronary artery disease patients. *Journal of the American College of*  
46 *Cardiology* 2003;**42**:1757-63.
- 47 608  
48 609 37 Heikkila K, Ebrahim S, Rumley A, *et al.* Associations of circulating C-reactive protein and  
49 interleukin-6 with survival in women with and without cancer: findings from the British Women's  
50 Heart and Health Study. *Cancer epidemiology, biomarkers & prevention : a publication of the*  
51  
52  
53  
54  
55  
56  
57  
58  
59  
60

1  
2  
3  
4 617 *American Association for Cancer Research, cosponsored by the American Society of Preventive*  
5  
6 618 *Oncology* 2007;**16**:1155-9.

7 619 38 Marsik C, Kazemi-Shirazi L, Schickbauer T, *et al.* C-reactive protein and all-cause mortality  
8  
9 620 in a large hospital-based cohort. *Clinical chemistry* 2008;**54**:343-9.

10 621 39 Proctor MJ, McMillan DC, Horgan PG, *et al.* Systemic inflammation predicts all-cause  
11  
12 622 mortality: a glasgow inflammation outcome study. *PloS one* 2015;**10**:e0116206.

13 623 40 Chen TH, Gona P, Sutherland PA, *et al.* Long-term C-reactive protein variability and  
14  
15 624 prediction of metabolic risk. *The American journal of medicine* 2009;**122**:53-61.

16  
17 625  
18  
19  
20  
21  
22  
23  
24  
25  
26  
27  
28  
29  
30  
31  
32  
33  
34  
35  
36  
37  
38  
39  
40  
41  
42  
43  
44  
45  
46  
47  
48  
49  
50  
51  
52  
53  
54  
55  
56  
57  
58  
59  
60

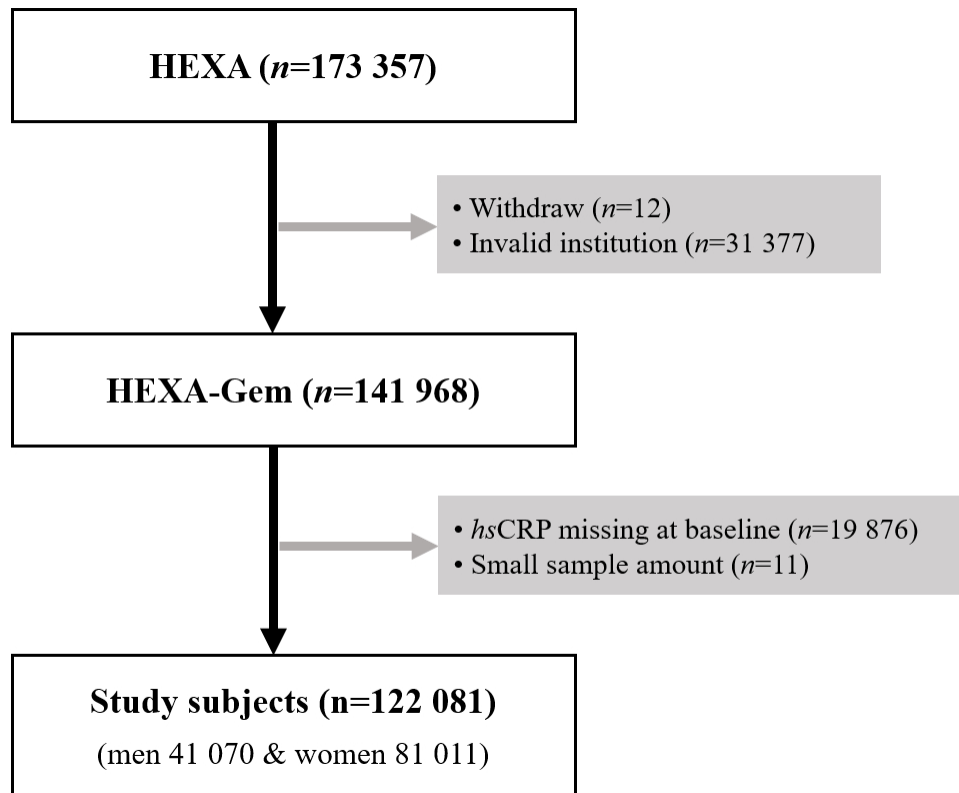

Flow diagram of analytical sample in current study using Health Examinees cohort  
HEXA: Health Examinees, hsCRP: High sensitivity C-reactive protein

169x137mm (150 x 150 DPI)

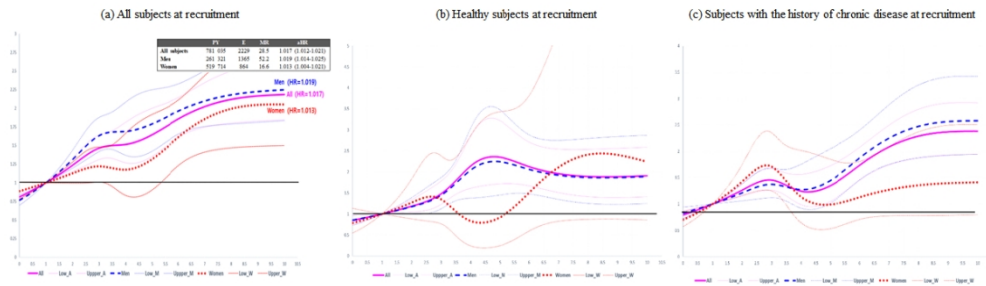

A dose-response association between serum hsCRP level and risk of all-cause mortality by subject.  
 PY: Person-year, E: Number of death, MR: Mortality rate (10 000 person year)  
 aHR: Adjusted for age, gender, education, job, marital status, BMI, non-communicable disease history,  
 smoking, alcohol consumption and exercise  
 Low\_A and Upper\_A: 95%CI for all subjects  
 Low\_M and Upper\_M: 95%CI for men  
 Low\_W and Upper\_W: 95%CI for women

330x97mm (96 x 96 DPI)

**Supplement 1.** The association of serum *hsCRP* level with the risk of all-cause mortality

|                       | PY      | E    | MR    | aHR                 | HR <sub>1year</sub> | HR <sub>2year</sub> |
|-----------------------|---------|------|-------|---------------------|---------------------|---------------------|
| <b>All subjects</b>   |         |      |       |                     |                     |                     |
| Continuous            | 781 035 | 2229 | 28.5  | 1.017 (1.012-1.021) | 1.015 (1.010-1.020) | 1.014 (1.009-1.019) |
| 1.00                  | 539 271 | 1153 | 21.4  | Reference           | Reference           | Reference           |
| 1.01-1.50             | 90 911  | 308  | 33.9  | 1.26 (1.10-1.45)    | 1.27 (1.10-1.45)    | 1.21 (1.04-1.40)    |
| 1.51-2.00             | 44 615  | 163  | 36.5  | 1.28 (1.08-1.53)    | 1.28 (1.07-1.53)    | 1.26 (1.04-1.52)    |
| 2.01-2.50             | 25 139  | 117  | 46.5  | 1.53 (1.25-1.89)    | 1.51 (1.22-1.87)    | 1.49 (1.19-1.87)    |
| 2.51-3.00             | 16 996  | 72   | 42.4  | 1.39 (1.08-1.80)    | 1.31 (1.00-1.72)    | 1.23 (0.92-1.65)    |
| 3.01-4.00             | 19 667  | 103  | 52.4  | 1.61 (1.29-2.01)    | 1.62 (1.29-2.03)    | 1.64 (1.30-2.08)    |
| 4.01-6.00             | 17 933  | 102  | 56.9  | 1.84 (1.48-2.28)    | 1.77 (1.41-2.21)    | 1.70 (1.34-2.16)    |
| 6.01-10.00            | 13 019  | 88   | 67.6  | 2.02 (1.59-2.56)    | 1.96 (1.54-2.50)    | 1.93 (1.49-2.51)    |
| >10.0                 | 13 484  | 123  | 91.2  | 2.59 (2.12-3.16)    | 2.41 (1.95-2.97)    | 2.26 (1.80-2.84)    |
| <i>P</i> -trend       |         |      |       | <.001               | <.001               | <.001               |
| <b>Men</b>            |         |      |       |                     |                     |                     |
| Continuous            | 261 321 | 1365 | 52.2  | 1.019 (1.014-1.025) | 1.017 (1.011-1.023) | 1.017 (1.010-1.023) |
| 1.00                  | 163 068 | 638  | 39.1  | Reference           | Reference           | Reference           |
| 1.01-1.50             | 36 094  | 190  | 52.6  | 1.27 (1.07-1.51)    | 1.28 (1.07-1.53)    | 1.22 (1.01-1.47)    |
| 1.51-2.00             | 17 946  | 103  | 57.4  | 1.34 (1.07-1.67)    | 1.34 (1.07-1.68)    | 1.35 (1.06-1.72)    |
| 2.01-2.50             | 10 059  | 77   | 76.5  | 1.56 (1.20-2.03)    | 1.53 (1.16-2.00)    | 1.47 (1.10-1.96)    |
| 2.51-3.00             | 6959    | 54   | 77.6  | 1.71 (1.27-2.29)    | 1.57 (1.15-2.15)    | 1.46 (1.04-2.05)    |
| 3.01-4.00             | 8177    | 77   | 94.2  | 1.88 (1.45-2.43)    | 1.94 (1.50-2.52)    | 1.92 (1.46-2.54)    |
| 4.01-6.00             | 7425    | 75   | 101.0 | 2.05 (1.59-2.63)    | 1.95 (1.49-2.53)    | 1.91 (1.44-2.52)    |
| 6.01-10.00            | 5456    | 59   | 108.1 | 2.03 (1.52-2.73)    | 1.96 (1.44-2.66)    | 1.85 (1.33-2.58)    |
| >10.0                 | 6137    | 92   | 149.9 | 2.84 (2.25-3.58)    | 2.66 (2.08-3.39)    | 2.58 (1.99-3.35)    |
| <i>P</i> -trend       |         |      |       | <.001               | <.001               | <.001               |
| <b>Women</b>          |         |      |       |                     |                     |                     |
| Continuous            | 519 714 | 864  | 16.6  | 1.013 (1.004-1.021) | 1.011(1.002-1.021)  | 1.010 (0.999-1.021) |
| 1.00                  | 376 203 | 515  | 13.7  | Reference           | Reference           | Reference           |
| 1.01-1.50             | 54 817  | 118  | 21.5  | 1.28 (1.03-1.59)    | 1.27 (1.02-1.58)    | 1.23 (0.97-1.56)    |
| 1.51-2.00             | 26 669  | 60   | 22.5  | 1.23 (0.92-1.64)    | 1.21 (0.90-1.63)    | 1.14 (0.83-1.56)    |
| 2.01-2.50             | 15 080  | 40   | 26.5  | 1.52 (1.09-2.14)    | 1.52 (1.08-2.15)    | 1.56 (1.09-2.24)    |
| 2.51-3.00             | 10 037  | 18   | 17.9  | 0.84 (0.49-1.44)    | 0.87 (0.51-1.48)    | 0.83 (0.46-1.47)    |
| 3.01-4.00             | 11 490  | 26   | 22.6  | 1.16 (0.75-1.81)    | 1.09 (0.68-1.72)    | 1.21 (0.76-1.93)    |
| 4.01-6.00             | 10 508  | 27   | 25.7  | 1.48 (0.99-2.22)    | 1.47 (0.97-2.22)    | 1.36 (0.86-2.14)    |
| 6.01-10.00            | 7563    | 29   | 38.3  | 2.00 (1.34-2.98)    | 1.98 (1.32-2.98)    | 2.10 (1.39-3.19)    |
| >10.0                 | 7347    | 31   | 42.2  | 2.02 (1.36-3.02)    | 1.84 (1.21-2.81)    | 1.51 (0.93-2.47)    |
| <i>P</i> -trend       |         |      |       | <.001               | <.001               | 0.001               |
| <b>Pre-menopause</b>  |         |      |       |                     |                     |                     |
| 1.00                  | 141 286 | 96   | 6.8   |                     |                     |                     |
| 1.01-2.00             | 20 500  | 20   | 9.8   | 1.52 (0.92-2.52)    | 1.49 (0.89-2.50)    | 1.57 (0.90-2.73)    |
| 2.01-3.00             | 5835    | 6    | 10.3  | 1.76 (0.77-4.06)    | 1.83 (0.79-4.22)    | 1.42 (0.52-3.93)    |
| 3.01-10.0             | 6886    | 6    | 8.7   | 1.51 (0.66-3.50)    | 1.31 (0.53-3.25)    | 1.21 (0.44-3.36)    |
| >10.0                 | 1759    | 4    | 22.7  | 2.57 (0.81-8.14)    | 2.63 (0.83-8.37)    | 2.09 (0.51-8.58)    |
| <i>P</i> -trend       |         |      |       | 0.020               | 0.036               | 0.150               |
| <b>Post-menopause</b> |         |      |       |                     |                     |                     |
| 1.00                  | 192 164 | 366  | 19.0  |                     |                     |                     |
| 1.01-2.00             | 52 897  | 145  | 27.4  | 1.26 (1.03-1.55)    | 1.25 (1.02-1.54)    | 1.18 (0.95-1.48)    |
| 2.01-3.00             | 16 943  | 44   | 26.0  | 1.11 (0.80-1.56)    | 1.12 (0.80-1.57)    | 1.19 (0.83-1.68)    |
| 3.01-10.0             | 19 687  | 67   | 34.0  | 1.49 (1.13-1.97)    | 1.47 (1.10-1.95)    | 1.52 (1.13-2.05)    |
| >10.0                 | 4828    | 27   | 55.9  | 2.09 (1.37-3.21)    | 1.88 (1.19-2.96)    | 1.56 (0.92-2.63)    |
| <i>P</i> -trend       |         |      |       | <0.001              | 0.001               | 0.003               |

PY: Person-year, E: Number of death, MR: Mortality rate (10,000 person year)

1  
2  
3  
4 aHR: Adjusted for age, gender, education, job, marital status, BMI, non-communicable disease history, smoking, alcohol  
5 consumption and exercise

6 HR<sub>1year</sub>: aHR after exclude subjects who died within 1 yr f/u time

7 HR<sub>2year</sub>: aHR after exclude subjects who died within 2 yr f/u time  
8  
9  
10  
11  
12  
13  
14  
15  
16  
17  
18  
19  
20  
21  
22  
23  
24  
25  
26  
27  
28  
29  
30  
31  
32  
33  
34  
35  
36  
37  
38  
39  
40  
41  
42  
43  
44  
45  
46  
47  
48  
49  
50  
51  
52  
53  
54  
55  
56  
57  
58  
59  
60

For peer review only



**Supplement 2.** The association between serum *hsCRP* level and all-cause mortality by gender and non-communicable disease history (NCD<sub>history</sub>) at recruitment

|                 | Healthy subjects at recruitment |       |       |                     |                     | Subjects with NCD <sub>history</sub> at recruitment |       |       |                     |                     |
|-----------------|---------------------------------|-------|-------|---------------------|---------------------|-----------------------------------------------------|-------|-------|---------------------|---------------------|
|                 | E                               | MR    | aHR   | HR <sub>1year</sub> | HR <sub>2year</sub> | E                                                   | MR    | aHR   | HR <sub>1year</sub> | HR <sub>2year</sub> |
| All             |                                 |       |       |                     |                     |                                                     |       |       |                     |                     |
| 1.00            | 517                             | 15.1  | Ref   | Ref                 | Ref                 | 636                                                 | 32.3  | Ref   | Ref                 | Ref                 |
| 1.01-2.00       | 145                             | 22.9  | 1.20  | 1.19                | 1.16                | 326                                                 | 45.1  | 1.20  | 1.19                | 1.16                |
| 2.01-3.00       | 53                              | 29.3  | 1.38  | 1.37                | 1.32                | 136                                                 | 56.6  | 1.51  | 1.46                | 1.41                |
| 3.01-10.0       | 102                             | 46.8  | 2.22  | 2.15                | 2.15                | 191                                                 | 66.3  | 1.62  | 1.60                | 1.58                |
| >10.0           | 40                              | 61.3  | 2.38  | 2.23                | 2.27                | 83                                                  | 118.9 | 2.74  | 2.54                | 2.29                |
| <i>P</i> -trend |                                 |       | <.001 | <.001               | <.001               |                                                     |       | <.001 | <.001               | <.001               |
| Men             |                                 |       |       |                     |                     |                                                     |       |       |                     |                     |
| 1.00            | 270                             | 29.5  | Ref   | Ref                 | Ref                 | 368                                                 | 51.4  | Ref   | Ref                 | Ref                 |
| 1.01-2.00       | 89                              | 35.8  | 1.11  | 1.11                | 1.13                | 204                                                 | 70.0  | 1.40  | 1.41                | 1.33                |
| 2.01-3.00       | 33                              | 46.3  | 1.22  | 1.17                | 1.15                | 98                                                  | 99.0  | 1.82  | 1.73                | 1.61                |
| 3.01-10.0       | 70                              | 76.8  | 2.14  | 2.08                | 2.03                | 141                                                 | 118.1 | 1.92  | 1.90                | 1.83                |
| >10.0           | 31                              | 110.0 | 2.60  | 2.49                | 2.73                | 61                                                  | 183.1 | 3.05  | 2.83                | 2.58                |
| <i>P</i> -trend |                                 |       | <.001 | <.001               | <.001               |                                                     |       | <.001 | <.001               | <.001               |
| Women           |                                 |       |       |                     |                     |                                                     |       |       |                     |                     |
| 1.00            | 247                             | 9.8   | Ref   | Ref                 | Ref                 | 268                                                 | 21.4  | Ref   | Ref                 | Ref                 |
| 1.01-2.00       | 56                              | 14.6  | 1.35  | 1.32                | 1.20                | 122                                                 | 28.3  | 1.19  | 1.20                | 1.19                |
| 2.01-3.00       | 20                              | 18.2  | 1.61  | 1.66                | 1.60                | 38                                                  | 26.9  | 1.06  | 1.06                | 1.11                |
| 3.01-10.0       | 32                              | 25.2  | 2.31  | 2.23                | 2.37                | 50                                                  | 29.7  | 1.16  | 1.14                | 1.17                |
| >10.0           | 9                               | 24.3  | 1.69  | 1.49                | 1.12                | 22                                                  | 60.3  | 2.15  | 1.99                | 1.68                |
| <i>P</i> -trend |                                 |       | <.001 | <.001               | 0.001               |                                                     |       | 0.018 | 0.043               | 0.084               |

E: Number of death, MR: Mortality rate (10 000 person year)

aHR: Adjusted for age, gender, education, job, marital status, BMI, non-communicable disease history, smoking, alcohol consumption and exercise

HR<sub>1year</sub>: aHR after exclude subjects who died within 1 yr f/u time

HR<sub>2year</sub>: aHR after exclude subjects who died within 2 yr f/u time

**STROBE 2007 (v4) checklist of items to be included in reports of observational studies in epidemiology\***  
**Checklist for cohort, case-control, and cross-sectional studies (combined)**

| Section/Topic             | Item # | Recommendation                                                                                                                                                                                                                                                                                                                                                                                                                                                         | Reported on page # |
|---------------------------|--------|------------------------------------------------------------------------------------------------------------------------------------------------------------------------------------------------------------------------------------------------------------------------------------------------------------------------------------------------------------------------------------------------------------------------------------------------------------------------|--------------------|
| Title and abstract        | 1      | (a) Indicate the study's design with a commonly used term in the title or the abstract                                                                                                                                                                                                                                                                                                                                                                                 | 1                  |
|                           |        | (b) Provide in the abstract an informative and balanced summary of what was done and what was found                                                                                                                                                                                                                                                                                                                                                                    | 1-2                |
| Introduction              |        |                                                                                                                                                                                                                                                                                                                                                                                                                                                                        |                    |
| Background/rationale      | 2      | Explain the scientific background and rationale for the investigation being reported                                                                                                                                                                                                                                                                                                                                                                                   | 3                  |
| Objectives                | 3      | State specific objectives, including any pre-specified hypotheses                                                                                                                                                                                                                                                                                                                                                                                                      | 3                  |
| Methods                   |        |                                                                                                                                                                                                                                                                                                                                                                                                                                                                        |                    |
| Study design              | 4      | Present key elements of study design early in the paper                                                                                                                                                                                                                                                                                                                                                                                                                | 4                  |
| Setting                   | 5      | Describe the setting, locations, and relevant dates, including periods of recruitment, exposure, follow-up, and data collection                                                                                                                                                                                                                                                                                                                                        | 4-5                |
| Participants              | 6      | (a) <i>Cohort study</i> —Give the eligibility criteria, and the sources and methods of selection of participants. Describe methods of follow-up<br><i>Case-control study</i> —Give the eligibility criteria, and the sources and methods of case ascertainment and control selection. Give the rationale for the choice of cases and controls<br><i>Cross-sectional study</i> —Give the eligibility criteria, and the sources and methods of selection of participants | 4                  |
|                           |        | (b) <i>Cohort study</i> —For matched studies, give matching criteria and number of exposed and unexposed<br><i>Case-control study</i> —For matched studies, give matching criteria and the number of controls per case                                                                                                                                                                                                                                                 | -                  |
| Variables                 | 7      | Clearly define all outcomes, exposures, predictors, potential confounders, and effect modifiers. Give diagnostic criteria, if applicable                                                                                                                                                                                                                                                                                                                               | 5                  |
| Data sources/ measurement | 8*     | For each variable of interest, give sources of data and details of methods of assessment (measurement). Describe comparability of assessment methods if there is more than one group                                                                                                                                                                                                                                                                                   | 5                  |
| Bias                      | 9      | Describe any efforts to address potential sources of bias                                                                                                                                                                                                                                                                                                                                                                                                              | 6                  |
| Study size                | 10     | Explain how the study size was arrived at                                                                                                                                                                                                                                                                                                                                                                                                                              | 4                  |
| Quantitative variables    | 11     | Explain how quantitative variables were handled in the analyses. If applicable, describe which groupings were chosen and why                                                                                                                                                                                                                                                                                                                                           | 5-6                |
| Statistical methods       | 12     | (a) Describe all statistical methods, including those used to control for confounding                                                                                                                                                                                                                                                                                                                                                                                  | 5-6                |
|                           |        | (b) Describe any methods used to examine subgroups and interactions                                                                                                                                                                                                                                                                                                                                                                                                    | 5-6                |
|                           |        | (c) Explain how missing data were addressed                                                                                                                                                                                                                                                                                                                                                                                                                            | 4                  |
|                           |        | (d) <i>Cohort study</i> —If applicable, explain how loss to follow-up was addressed<br><i>Case-control study</i> —If applicable, explain how matching of cases and controls was addressed                                                                                                                                                                                                                                                                              | 4                  |

|                          |     |                                                                                                                                                                                                              |       |
|--------------------------|-----|--------------------------------------------------------------------------------------------------------------------------------------------------------------------------------------------------------------|-------|
|                          |     | <i>Cross-sectional study</i> —If applicable, describe analytical methods taking account of sampling strategy                                                                                                 |       |
|                          |     | (e) Describe any sensitivity analyses                                                                                                                                                                        | 6     |
| <b>Results</b>           |     |                                                                                                                                                                                                              |       |
| Participants             | 13* | (a) Report numbers of individuals at each stage of study—eg numbers potentially eligible, examined for eligibility, confirmed eligible, included in the study, completing follow-up, and analysed            | 4     |
|                          |     | (b) Give reasons for non-participation at each stage                                                                                                                                                         | 4     |
|                          |     | (c) Consider use of a flow diagram                                                                                                                                                                           | 4     |
| Descriptive data         | 14* | (a) Give characteristics of study participants (eg demographic, clinical, social) and information on exposures and potential confounders                                                                     | 6-7   |
|                          |     | (b) Indicate number of participants with missing data for each variable of interest                                                                                                                          | 4     |
|                          |     | (c) <i>Cohort study</i> —Summarise follow-up time (eg, average and total amount)                                                                                                                             | 6     |
| Outcome data             | 15* | <i>Cohort study</i> —Report numbers of outcome events or summary measures over time                                                                                                                          | 6-10  |
|                          |     | <i>Case-control study</i> —Report numbers in each exposure category, or summary measures of exposure                                                                                                         |       |
|                          |     | <i>Cross-sectional study</i> —Report numbers of outcome events or summary measures                                                                                                                           |       |
| Main results             | 16  | (a) Give unadjusted estimates and, if applicable, confounder-adjusted estimates and their precision (eg, 95% confidence interval). Make clear which confounders were adjusted for and why they were included | 6-10  |
|                          |     | (b) Report category boundaries when continuous variables were categorized                                                                                                                                    | 5     |
|                          |     | (c) If relevant, consider translating estimates of relative risk into absolute risk for a meaningful time period                                                                                             | -     |
| Other analyses           | 17  | Report other analyses done—eg analyses of subgroups and interactions, and sensitivity analyses                                                                                                               | 8     |
| <b>Discussion</b>        |     |                                                                                                                                                                                                              |       |
| Key results              | 18  | Summarise key results with reference to study objectives                                                                                                                                                     | 11    |
| Limitations              | 19  | Discuss limitations of the study, taking into account sources of potential bias or imprecision. Discuss both direction and magnitude of any potential bias                                                   | 12-13 |
| Interpretation           | 20  | Give a cautious overall interpretation of results considering objectives, limitations, multiplicity of analyses, results from similar studies, and other relevant evidence                                   | 11-12 |
| Generalisability         | 21  | Discuss the generalisability (external validity) of the study results                                                                                                                                        | 11-12 |
| <b>Other information</b> |     |                                                                                                                                                                                                              |       |
| Funding                  | 22  | Give the source of funding and the role of the funders for the present study and, if applicable, for the original study on which the present article is based                                                | 13    |

\*Give information separately for cases and controls in case-control studies and, if applicable, for exposed and unexposed groups in cohort and cross-sectional studies.

**Note:** An Explanation and Elaboration article discusses each checklist item and gives methodological background and published examples of transparent reporting. The STROBE checklist is best used in conjunction with this article (freely available on the Web sites of PLoS Medicine at <http://www.plosmedicine.org/>, Annals of Internal Medicine at <http://www.annals.org/>, and Epidemiology at <http://www.epidem.com/>). Information on the STROBE Initiative is available at [www.strobe-statement.org](http://www.strobe-statement.org).

# BMJ Open

## The association of serum high sensitivity C-reactive protein with the risk of mortality in Asian: the Health Examinees cohort

|                                 |                                                                                                                                                                                                                                                                                                                                                                                                                                                                                                   |
|---------------------------------|---------------------------------------------------------------------------------------------------------------------------------------------------------------------------------------------------------------------------------------------------------------------------------------------------------------------------------------------------------------------------------------------------------------------------------------------------------------------------------------------------|
| Journal:                        | <i>BMJ Open</i>                                                                                                                                                                                                                                                                                                                                                                                                                                                                                   |
| Manuscript ID                   | bmjopen-2021-052630.R1                                                                                                                                                                                                                                                                                                                                                                                                                                                                            |
| Article Type:                   | Original research                                                                                                                                                                                                                                                                                                                                                                                                                                                                                 |
| Date Submitted by the Author:   | 27-Oct-2021                                                                                                                                                                                                                                                                                                                                                                                                                                                                                       |
| Complete List of Authors:       | Lee, Sang-Ah; Kangwon National University School of Medicine, Preventive Medicine; Vanderbilt University Medical Center<br>Kwon, Sung Ok; Kangwon National University School of Medicine, Preventive Medicine<br>Park, Hyerim; Kangwon National University School of Medicine, Preventive Medicine<br>Shu, Xiao-Ou ; Vanderbilt University Medical Center<br>Lee, Jong-Koo; JW LEE Center for Global Medicine<br>Kang, Daehee; Seoul National University College of Medicine, Preventive Medicine |
| <b>Primary Subject Heading</b>: | Epidemiology                                                                                                                                                                                                                                                                                                                                                                                                                                                                                      |
| Secondary Subject Heading:      | Epidemiology, Cardiovascular medicine                                                                                                                                                                                                                                                                                                                                                                                                                                                             |
| Keywords:                       | PREVENTIVE MEDICINE, EPIDEMIOLOGY, Cardiac Epidemiology < CARDIOLOGY                                                                                                                                                                                                                                                                                                                                                                                                                              |
|                                 |                                                                                                                                                                                                                                                                                                                                                                                                                                                                                                   |

SCHOLARONE™  
Manuscripts



I, the Submitting Author has the right to grant and does grant on behalf of all authors of the Work (as defined in the below author licence), an exclusive licence and/or a non-exclusive licence for contributions from authors who are: i) UK Crown employees; ii) where BMJ has agreed a CC-BY licence shall apply, and/or iii) in accordance with the terms applicable for US Federal Government officers or employees acting as part of their official duties; on a worldwide, perpetual, irrevocable, royalty-free basis to BMJ Publishing Group Ltd ("BMJ") its licensees and where the relevant Journal is co-owned by BMJ to the co-owners of the Journal, to publish the Work in this journal and any other BMJ products and to exploit all rights, as set out in our [licence](#).

The Submitting Author accepts and understands that any supply made under these terms is made by BMJ to the Submitting Author unless you are acting as an employee on behalf of your employer or a postgraduate student of an affiliated institution which is paying any applicable article publishing charge ("APC") for Open Access articles. Where the Submitting Author wishes to make the Work available on an Open Access basis (and intends to pay the relevant APC), the terms of reuse of such Open Access shall be governed by a Creative Commons licence – details of these licences and which [Creative Commons](#) licence will apply to this Work are set out in our licence referred to above.

Other than as permitted in any relevant BMJ Author's Self Archiving Policies, I confirm this Work has not been accepted for publication elsewhere, is not being considered for publication elsewhere and does not duplicate material already published. I confirm all authors consent to publication of this Work and authorise the granting of this licence.

1  
2  
3  
4 196 **The association of serum high sensitivity C-reactive protein with the risk of mortality in**  
5  
6 197 **Asian: the Health Examinees cohort**

7 198

8 199

9  
10 200 **Sang-Ah Lee<sup>1,2\*</sup>, Sung Ok Kwon<sup>1</sup>, Hyerim Park<sup>1</sup>, Xiao-Ou Shu<sup>2</sup>, Jong-Koo Lee<sup>3</sup>, Daehee Kang<sup>4</sup>**

11 201

12 202

13 203 <sup>1</sup>Department of Preventive Medicine, School of Medicine, Kangwon National University, Chuncheon, Republic  
14 204 of Korea.15 205 <sup>2</sup>Division of Epidemiology, Vanderbilt Epidemiology Center, Vanderbilt University Medical Center, Nashville,  
16 206 TN, USA.17 207 <sup>3</sup>JW Lee Center for Global Medicine, College of Medicine, Seoul National University, Seoul, Republic of Korea.18 208 <sup>4</sup>Department of Preventive Medicine, College of Medicine, Seoul National University, Seoul, Republic of Korea.

19 209

20 210

21 211 **ABSTRACT**22 212 **Objectives** This study aimed to examine the association of *hsCRP* with mortality risk and the attenuated effect  
23 213 of non-communicable disease history (NCD<sub>history</sub>) on the association.24 214 **Design** Prospective cohort study.25 215 **Setting** the Health Examinees (HEXA) cohort.26 216 **Participants** A total of 41 070 men and 81 011 women aged  $\geq 40$  years were involved (follow-up: 6.8 years).27 217 **Outcome measures** The data and cause of death occurring until December 31, 2015, were confirmed by death  
28 218 statistics from the National Statistical Office. We conducted the advanced analysis after stratification by  
29 219 NCD<sub>history</sub> and the sensitivity analysis after excluding death before 1 or 2 years from recruitment. Cox  
30 220 proportional hazard and restricted cubic spline models were used to assess the association.31 221 **Results** The association between serum *hsCRP* and the risk of all-cause mortality was observed with strong  
32 222 linearity in both genders, which was not influenced by NCD<sub>history</sub>. Otherwise, the association of serum *hsCRP*  
33 223 with cancer-mortality risk was not observed in women with NCD<sub>history</sub>, but the association with the risk of  
34 224 cardiovascular disease (CVD) mortality was predominantly observed in men with NCD<sub>history</sub>.35 225 **Conclusions** This study suggested the dose-response association of *hsCRP* with mortality risk, including  
36 226 cancer and CVD mortality, in Korean with low serum *hsCRP*, although the association with cancer and CVD-  
37 227 mortality risk could be influenced by gender and NCD<sub>history</sub>.

38 228

39 229

40 230 **Strengths and limitations of this study**

41 231 • This is the large population-based prospective study.

42 232 • We examined the effect of very high *hsCRP* concentration on mortality risk.43 233 • The *hsCRP* level of present study was measured within 18 hours in a single institution to minimize error/bias.

1  
2  
3  
4 234 • Due to random fluctuations of *hsCRP*, using the single measurement of *hsCRP* at baseline could reflect the  
5  
6 235 inaccurate status of blood *hsCRP* levels in the study participants and increase the instability of *hsCRP*.  
7  
8 236 • This study lacked information on medication use at recruitment and during the follow-up period, and  
9  
10 237 information on hormone-replacement therapy (HRT) among women.  
11  
12 238  
13 239

14 240 \*Correspondence to: Sang-Ah Lee, Ph.D.

15 241 Department of Preventive Medicine, School of Medicine, Kangwon National University,

16 242 Chuncheon, Gangwon, Republic of Korea.

17 243 Tel: +82 33 250 8871

18 244 E-mail: [sangahlee@kangwon.ac.kr](mailto:sangahlee@kangwon.ac.kr)  
19  
20  
21  
22  
23  
24  
25  
26  
27  
28  
29  
30  
31  
32  
33  
34  
35  
36  
37  
38  
39  
40  
41  
42  
43  
44  
45  
46  
47  
48  
49  
50  
51  
52  
53  
54  
55  
56  
57  
58  
59  
60

## 266 INTRODUCTION

267 High sensitivity C-reactive protein (*hsCRP*) is an acute-phase response protein synthesized by the liver and  
268 the most sensitive and dynamic marker of inflammation[1]. Since *hsCRP* has been reported as a candidate  
269 marker for generalized atherosclerosis and cardiovascular disease (CVD)[2], many studies[3-7] have  
270 investigated the role of *hsCRP* levels as a predictor of mortality risk. A recent meta-analysis[8] reported the  
271 predictable role of serum *hsCRP* on all-cause and CVD mortality in the general population. Nevertheless, it is  
272 controversial whether the predictable role of *hsCRP* could be applied to the risk of mortality in Asians, whose  
273 *hsCRP* levels are lower than those in individuals in Western countries.

274 Serum *hsCRP* represents a low-grade inflammation state that is generally involved in the process of aging[9].  
275 Several large cohorts, including Study of Women's Health Across the Nation (SWAN)[10], the Women's  
276 Health Study[11] and the Dallas Heart Study[12], reported significant differences in *hsCRP* levels by race and  
277 gender. In two studies of multiethnic populations residing in the USA[10, 13], the median *hsCRP* level in East  
278 Asians was less than half the concentration in Caucasians. Even among East Asian populations, the geometric  
279 mean of *hsCRP* levels varied depending on ethnic background[14]. In addition, a meta-analysis[11] reported  
280 the *hsCRP* levels among women of various ethnic groups living in the United States (from the Women's Health  
281 Study) on the association between *hsCRP* and the mortality risk; the association was observed in only men  
282 supported by the results from two cohort studies[15, 16] reported in Korea. On the other hand, the increased  
283 *hsCRP* may be influenced by comorbidity itself because inflammation has emerged as an important factor in the  
284 progression of non-communicable diseases (NCDs), including CVD[17], cancer[18], chronic obstructive  
285 pulmonary disease (COPD)[19], type 2 diabetes[20] and fractures[21], which contribute to increased morbidity  
286 and mortality.

287 This study aimed to examine the association of serum *hsCRP* with the risk of mortality in Koreans with low  
288 serum *hsCRP* and to evaluate the attenuated effect of non-communicable disease history ( $NCD_{history}$ ) on the  
289 association.

290

291

292

293

294



## 295 **METHODS**

### 296 **Study population**

297 Details on the main objectives, rationale, study design and baseline characteristics of the Health Examinees  
298 (HEXA) study have been published elsewhere[22]. Considering the homogeneity and comparability of  
299 participants, we created a qualified dataset called HEXA-G (Health Examinees-Gem) from previously published  
300 HEXA studies[23]. In the new HEXA-G data, a total of 141 968 participants remained after the exclusion of  
301 withdrawers ( $n=12$ ). In addition, 19 887 were excluded due to missing information ( $n=19\ 876$ ) or small sample  
302 size ( $n=11$ ) on any *hsCRP* components at the baseline survey. Ultimately, 122 081 subjects, including 41 070  
303 men and 81 011 women, remained in the final analysis (Fig. 1). All study participants provided informed  
304 consent prior to entering the study. The Institutional Review Board of the Seoul National University Hospital,  
305 Seoul, Korea, approved it for statistical analysis (IRB No. E-1503-103-657).

### 307 **Laboratory measurements**

308 After at least 10 hours of overnight fasting, blood samples were obtained in the morning. Bio-specimens  
309 included fasting blood samples that were collected in a serum separator tube and two ethylenediaminetetraacetic  
310 acid (EDTA) tubes. All samples were then transported to the National Biobank of Korea and stored for future  
311 research purposes within 18 hours. *hsCRP* was measured using a turbidimetric immunoassay (ADVIA 1650 and  
312 ADVIA 1800; Siemens Healthineers).

### 314 **Follow-up and ascertainment of mortality**

315 All-cause mortality was confirmed by death statistics from the National Statistical Office, which provided the  
316 data and causes of all deaths occurring through December 31, 2015. We added the mortality data from Statistics  
317 Korea to our dataset using each participant's unique identifier. Information on death and causes of death was  
318 obtained from a record link with the national death certificate files in Korea. The main outcome of interest was  
319 all-cause mortality (defined as death from any cause), including cancers and CVD mortality. The cause of death  
320 was classified according to the International Classification of Diseases, 10th revision (ICD-10). Deaths were  
321 coded as C00-C97 for cancer and I00-I99 for CVD.

322

### 323 **Baseline variables**

324 Trained interviewers collected information on demographic, socioeconomic and lifestyle factors.  
325 Anthropometric measurements were obtained using standardized methods. Body mass index (BMI) was  
326 calculated, and all participants were defined into four classes based on the World Health Organization  
327 classification of BMI for Asian adults[24]: underweight (BMI <18.5 kg/m<sup>2</sup>), normal (18.5 ≤ BMI <23.0 kg/m<sup>2</sup>),  
328 overweight (23.0 ≤ BMI <25.0 kg/m<sup>2</sup>), obesity (25.0 ≤ BMI <29.9 kg/m<sup>2</sup>), and severe obesity (BMI ≥30.0 kg/m<sup>2</sup>).  
329 The current study defined metabolic syndrome using the National Cholesterol Education Program Adult  
330 Treatment Panel III (NCEP-ATP III)[25], modified for the Asian guideline for waist circumference (WC ≥90 and  
331 ≥80 cm for men and women, respectively). Nonsmokers were defined as those who had smoked less than 400  
332 cigarettes over the course of their lifetime. Participants who had smoked were categorized into two groups:  
333 noncurrent (never/former) and current smoker. Noncurrent drinkers were defined as those who had never  
334 consumed an alcoholic drink over the course of their lifetime or those who had not consumed alcohol at  
335 recruitment, while current drinkers were defined as those who persisted in consuming alcohol. Regular exercise  
336 was classified into two groups (yes/no) as follows: “Do you currently engage in regular exercise strenuous enough  
337 to cause you to break into a sweat at least once per week?” Furthermore, considering the attenuated effect of the  
338 NCD<sub>history</sub> on the association between serum *hsCRP* and the risk of mortality, we performed advanced analysis  
339 after stratification by NCD<sub>history</sub>. We considered six main non-communicable diseases (hypertension, diabetes,  
340 hyperlipidemia, cancer, cardiovascular and cerebrovascular diseases, and respiratory disease) to classify healthy  
341 subjects vs. subjects with NCD<sub>history</sub>.

342

### 343 **Statistical analysis**

344 For the categorical analysis, we created nine categories based on the distribution of *hsCRP* levels in our  
345 population: ≤1.00 (reference group), 1.01-1.50, 1.51-2.00, 2.01-2.50, 2.51-3.00, 3.01-4.00, 4.01-6.00, 6.01-10.0,  
346 and >10.0 mg/L. For the advanced analysis after stratification by the NCD<sub>history</sub>, the *hsCRP* levels were  
347 categorized as ≤1.00, 1.01-2.00, 2.01-3.00, 3.01-10.0, and >10.0 mg/L because of the reduced sample size in  
348 each subgroup. The concentrations of *hsCRP* were log-transformed for analyses because of the skewed  
349 distribution.

350 We calculated a follow-up time for each subject starting from the date of interview until the date of death or  
351 December 31, 2015, whichever came first. Using age as the time scale, subjects enter the risk set at the age at  
352 which they completed the baseline questionnaire and exit at their event/censoring age. The associations of

1  
2  
3  
4 353 *hsCRP* and all-cause mortality, as well as cancer and CVD mortality, were analyzed by Cox proportional hazard  
5  
6 354 models (aHR) and included adjustment for age, gender, demographic factors (education, marital status, job, BMI  
7  
8 355 and NCD<sub>history</sub>), and lifestyle factors (smoking, alcohol consumption and exercise). We used Wald tests to test  
9  
10 356 for heterogeneity of risk between serum *hsCRP* level groups. The proportional hazards assumption was assessed  
11  
12 357 on the basis of Schoenfeld residuals, and was not violated for the variables of interest in the adjusted model for  
13  
14 358 either cancer-mortality or cardiovascular disease mortality ( $P>0.05$  for all categories). In addition, we conducted  
15  
16 359 a sensitivity analysis to avoid latent period bias after excluding death before 1 year (aHR<sub>1year</sub>) or 2 years  
17  
18 360 (aHR<sub>2year</sub>) since recruitment. Based on the Cox proportional hazard models, we made Kaplan-Meier curves and  
19  
20 361 log-rank analysis. We employed restricted cubic splines (RCSs) to evaluate the possibility of complex (i.e.,  
21  
22 362 nonlinear) hazard functions[26] using continuous values of *hsCRP* (aHR<sub>continuous</sub>). We selected five *hsCRP*  
23  
24 363 concentration values as knots based on *hsCRP* concentration percentiles, tested the linear and nonlinear associa-  
25  
26 364 tions between knots using a cubic function, and presented the integrated graph smoothly. All statistical analyses  
27  
28 365 were performed using SAS version 9.3 (SAS Institute Inc., Cary, NC, USA) and RCS analysis was carried out  
29  
30 366 using the SAS LGTPHCURV9 macro. Two-sided  $p$ -values  $<0.05$  were defined as indicating statistical  
31  
32 367 significance.

33 368

### 369 **Patient and public involvement**

370 No patients and public were involved in the design, conducting, reporting, and dissemination plans of the present  
38  
39 371 study.

40 372

41 373

## 42 374 **RESULTS**

43  
44  
45  
46  
47 375 The association of demographic and lifestyle factors with the risk of all-cause mortality is presented in Table  
48  
49 376 1. During the follow-up period (average 6.8 years), 1 365 men and 864 women died. The median levels of  
50  
51 377 *hsCRP* were 0.77 and 0.59 mg/L for men and women, respectively. The risk of all-cause mortality was inversely  
52  
53 378 associated with female gender (aHR=0.38), high educated (aHR=0.65), overweight (aHR=0.81) or obesity  
54  
55 379 (aHR=0.83), current alcohol consumption (aHR=0.81) and regular exercise (aHR=0.83), but was positively  
56  
57 380 associated with single marital status (aHR=1.23), NCD<sub>history</sub> (aHR=1.57), underweight (aHR=2.05) and current  
58  
59 381 smoking (aHR=1.97).

382 **Table 1.** Baseline characteristics of participants by all-cause mortality

|                                      | All<br>(n=122 081) | Death<br>(n=2229) | All-cause mortality |                     |
|--------------------------------------|--------------------|-------------------|---------------------|---------------------|
|                                      |                    |                   | Age,gender adjusted | adj HR <sup>a</sup> |
| Age                                  | 53.1 ± 8.3         | 59.7 ± 8.8        |                     |                     |
| Female                               | 66.4               | 38.8              | 0.40 (0.36-0.43)    | 0.38 (0.33-0.44)    |
| Education (≥10 year, %)              | 68.2               | 55.4              | 0.67 (0.60-0.75)    | 0.65 (0.56-0.75)    |
| Blue-colored worker <sup>b</sup> (%) | 32.3               | 33.8              | 1.46 (1.26-1.68)    | 1.16 (0.99-1.35)    |
| Marital status (single, %)           | 11.0               | 13.3              | 1.35 (1.19-1.54)    | 1.23 (1.07-1.40)    |
| NCD <sub>history</sub> (yes, %)      | 32.4               | 53.6              | 1.51 (1.39-1.65)    | 1.57 (1.42-1.72)    |
| Hypertension                         | 18.9               | 31.5              | 1.18 (1.08-1.30)    | 1.22 (1.11-1.35)    |
| Diabete                              | 6.5                | 17.1              | 1.81 (1.62-2.03)    | 1.77 (1.57-2.00)    |
| Hyperlipidemia                       | 9.2                | 7.6               | 0.73 (0.62-0.86)    | 0.78 (0.66-0.92)    |
| Cancer                               | 3.2                | 8.8               | 2.69 (2.31-3.12)    | 2.66 (2.27-3.11)    |
| Cerebral & cardiovascular disease    | 3.7                | 10.2              | 1.50 (1.30-1.73)    | 1.43 (1.23-1.66)    |
| Respiratory disease                  | 2.4                | 4.3               | 1.37 (1.12-1.68)    | 1.32 (1.06-1.64)    |
| Body mass index (%)                  |                    |                   |                     |                     |
| <18.5                                | 1.8                | 3.7               | 2.14 (1.69-2.69)    | 2.05 (1.61-2.62)    |
| 18.5-22.9                            | 38.1               | 34.9              | 1.00 (ref.)         | 1.00 (ref.)         |
| 23.0-24.9                            | 27.8               | 26.0              | 0.82 (0.73-0.91)    | 0.81 (0.72-0.91)    |
| 25.0-29.9                            | 29.5               | 32.5              | 0.90 (0.81-1.00)    | 0.83 (0.74-0.93)    |
| ≥ 30.0                               | 2.8                | 2.9               | 1.08 (0.83-1.39)    | 0.81 (0.61-1.08)    |
| P-trend                              |                    |                   | 0.0118              | <.0001              |
| Metabolic syndrome (yes, %)          | 22.0               | 28.4              | 1.13 (1.03-1.24)    | 1.07 (0.96-1.19)    |
| Current smoker (%)                   | 11.7               | 22.7              | 2.04 (1.79-2.33)    | 1.97 (1.71-2.27)    |
| Current drinker (%)                  | 44.0               | 43.8              | 0.86 (0.77-0.95)    | 0.81 (0.73-0.91)    |
| Regular exercise (yes, %)            | 53.4               | 49.1              | 0.76 (0.70-0.83)    | 0.83 (0.76-0.91)    |

383 NCD<sub>history</sub>: Non-communicable disease history384 <sup>a</sup> Adjusted for age, gender, education, job, marital status, BMI and non-communicable disease history385 <sup>b</sup> Compared to white-colored worker

386

387

388

389

390

391

392

393

394

1  
2  
3  
4 395 The risk of all-cause mortality was inclined with a dose-dependent pattern as increased serum *hsCRP* level  
5  
6 396 ( $P_{trend}<0.001$ , Supplement 1), regardless of gender ( $P_{trend}<0.001$  in both genders), even in the sensitivity analysis  
7  
8 397 ( $P_{trend}<0.001$  for  $aHR_{1year}$  in both genders). The increased risk of female mortality with increased *hsCRP* levels  
9  
10 398 was observed in both premenopausal ( $P_{trend}=0.020$ ) and postmenopausal women ( $P_{trend}<0.001$ ), although the  
11  
12 399 statistical significance in premenopausal women disappeared after sensitivity analysis ( $P_{trend}=0.150$  for  $aHR_{2year}$ ,  
13  
14 400 Supplement 1). The integrated graph, based on the restricted cubic spline analyses, indicated a strong and linear  
15  
16 401 association of serum *hsCRP* level with all-cause mortality in both genders ( $aHR_{continuous}=1.019$  and  $1.013$  in men  
17  
18 402 and women, respectively, Fig. 2).

19 403 The dose-response association between *hsCRP* level and the risk of all-cause mortality was not influenced by  
20  
21 404  $NCD_{history}$  (Supplement 2). After stratification by gender, however, the attenuated effect by  $NCD_{history}$  on the  
22  
23 405 association was observed only in women; the linearity of the relationship was observed in healthy women  
24  
25 406 ( $P_{trend}=0.001$  for  $aHR_{2year}$ ) but disappeared in women with  $NCD_{history}$ , particularly after sensitivity analysis with  
26  
27 407 the exclusion of a 2-year follow-up time ( $P_{trend}=0.084$  for  $aHR_{2year}$ ). Based on the restricted cubic spline  
28  
29 408 analyses, otherwise, the pattern of increase in the association was different depending on the  $NCD_{history}$  (Fig.  
30  
31 409 3,4). In the healthy subjects, the risk of all-cause mortality was increased with a gradual slope (strength) until  
32  
33 410  $3.0$  mg/L *hsCRP*, with a very steep slope until  $4.5$  mg/L and finally with a reduced and flattened slope after  $4.5$   
34  
35 411 mg/L (Fig. 3). On the other hand, the slope of the association fluctuated as the *hsCRP* level increased in the  
36  
37 412 subjects with  $NCD_{history}$ ; the slope increased up to  $3.0$  mg/L *hsCRP* but decreased until  $4.5$  mg/L and rapidly  
38  
39 413 increased after  $4.5$  mg/L (Fig. 4).

40 414 The association of serum *hsCRP* with the risk of cancer-mortality was not influenced by  $NCD_{history}$   
41  
42 415 ( $P_{trend}<0.001$  regardless of  $NCD_{history}$ ) (Table 2 and Fig. 5-9). Otherwise, after stratification by gender, the  
43  
44 416 association was not observed in women with  $NCD_{history}$  ( $P_{trend}=0.856$ ); however, the association was not  
45  
46 417 influenced by  $NCD_{history}$  in men ( $P_{trend}<0.001$  and  $0.002$  for  $aHR$  in both healthy and  $NCD_{history}$ ) (Table 2).  
47  
48 418 Although the risk of CVD mortality was linearly associated with increasing *hsCRP* levels, the association was  
49  
50 419 dominant in men ( $P_{trend}=0.002$ ) and in subjects with  $NCD_{history}$  ( $P_{trend}=0.001$ , Table 3) after stratified by gender  
51  
52 420 and  $NCD_{history}$ , respectively (Fig. 10-14). After stratification by gender and  $NCD_{history}$ , otherwise, the association  
53  
54 421 only appeared in individuals of both genders with  $NCD_{history}$  ( $P_{trend}=0.015$  and  $0.035$  in men and women with  
55  
56 422  $NCD_{history}$ , respectively); no association between *hsCRP* level and CVD mortality risk was found in either  
57  
58 423 healthy men or women.  
59  
60

**Table 2.** The association between serum *hsCRP* level and cancer-mortality by gender and non-communicable disease history (NCD<sub>history</sub>) at recruitment

|                 | Cancer-mortality |      |       |                     |                     | Healthy subjects at recruitment |       |       |                     |                     | Subjects with NCD <sub>history</sub> at recruitment |      |       |                     |                     |
|-----------------|------------------|------|-------|---------------------|---------------------|---------------------------------|-------|-------|---------------------|---------------------|-----------------------------------------------------|------|-------|---------------------|---------------------|
|                 | E                | MR   | aHR   | HR <sub>1year</sub> | HR <sub>2year</sub> | E                               | MR    | aHR   | HR <sub>1year</sub> | HR <sub>2year</sub> | E                                                   | MR   | aHR   | HR <sub>1year</sub> | HR <sub>2year</sub> |
| <b>Total</b>    |                  |      |       |                     |                     |                                 |       |       |                     |                     |                                                     |      |       |                     |                     |
| ≤1.00           | 590              | 10.9 | Ref   | Ref                 | Ref                 | 270                             | 7.9   | Ref   | Ref                 | Ref                 | 320                                                 | 16.3 | Ref   | Ref                 | Ref                 |
| 1.01-2.00       | 232              | 17.1 | 1.25  | 1.23                | 1.17                | 85                              | 13.4  | 1.43  | 1.40                | 1.31                | 147                                                 | 20.3 | 1.19  | 1.13                | 1.09                |
| 2.01-3.00       | 86               | 20.4 | 1.32  | 1.24                | 1.19                | 29                              | 16.0  | 1.38  | 1.34                | 1.35                | 57                                                  | 23.7 | 1.35  | 1.18                | 1.10                |
| 3.01-10.0       | 149              | 29.4 | 1.83  | 1.76                | 1.72                | 54                              | 24.8  | 2.22  | 2.07                | 2.01                | 95                                                  | 33.0 | 1.75  | 1.59                | 1.55                |
| >10.0           | 66               | 48.9 | 2.69  | 2.28                | 1.96                | 20                              | 30.6  | 1.85  | 1.59                | 1.57                | 46                                                  | 65.9 | 3.25  | 2.64                | 2.16                |
| <i>P</i> -trend |                  |      | <.001 | <.001               | <.001               |                                 |       | <.001 | <.001               | <.001               |                                                     |      | <.001 | <.001               | <.001               |
| <b>Men</b>      |                  |      |       |                     |                     |                                 |       |       |                     |                     |                                                     |      |       |                     |                     |
| ≤1.00           | 302              | 18.5 | Ref   | Ref                 | Ref                 | 169                             | 23.6  | Ref   | Ref                 | Ref                 | 133                                                 | 14.5 | Ref   | Ref                 | Ref                 |
| 1.01-2.00       | 144              | 26.6 | 1.36  | 1.36                | 1.32                | 95                              | 32.6  | 1.40  | 1.38                | 1.34                | 49                                                  | 19.7 | 1.31  | 1.34                | 1.31                |
| 2.01-3.00       | 59               | 34.7 | 1.45  | 1.31                | 1.19                | 40                              | 40.4  | 1.54  | 1.37                | 1.16                | 19                                                  | 26.7 | 1.29  | 1.22                | 1.26                |
| 3.01-10.0       | 111              | 52.7 | 2.17  | 2.10                | 2.00                | 77                              | 64.5  | 2.26  | 2.24                | 2.12                | 34                                                  | 37.3 | 1.98  | 1.80                | 1.70                |
| >10.0           | 50               | 82.9 | 3.13  | 2.66                | 2.34                | 38                              | 114.1 | 4.07  | 3.42                | 2.79                | 13                                                  | 46.1 | 1.58  | 1.40                | 1.56                |
| <i>P</i> -trend |                  |      | <.001 | <.001               | <.001               |                                 |       | <.001 | <.001               | <.001               |                                                     |      | 0.002 | 0.009               | 0.015               |
| <b>Women</b>    |                  |      |       |                     |                     |                                 |       |       |                     |                     |                                                     |      |       |                     |                     |
| ≤1.00           | 288              | 7.7  | Ref   | Ref                 | Ref                 | 137                             | 5.5   | Ref   | Ref                 | Ref                 | 151                                                 | 12.1 | Ref   | Ref                 | Ref                 |
| 1.01-2.00       | 88               | 10.8 | 1.13  | 1.08                | 0.99                | 36                              | 9.4   | 1.60  | 1.48                | 1.31                | 52                                                  | 12.1 | 0.86  | 0.86                | 0.81                |
| 2.01-3.00       | 27               | 10.7 | 1.16  | 1.17                | 1.2                 | 10                              | 9.1   | 1.48  | 1.50                | 1.47                | 17                                                  | 12.0 | 0.96  | 0.98                | 1.03                |
| 3.01-10.0       | 38               | 12.9 | 1.31  | 1.24                | 1.29                | 20                              | 15.8  | 2.58  | 2.48                | 2.57                | 18                                                  | 10.7 | 0.75  | 0.71                | 0.74                |
| >10.0           | 15               | 20.4 | 1.89  | 1.61                | 1.28                | 7                               | 18.9  | 2.16  | 1.75                | 1.42                | 8                                                   | 21.9 | 1.66  | 1.47                | 1.17                |
| <i>P</i> -trend |                  |      | 0.019 | 0.074               | 0.161               |                                 |       | <.001 | 0.001               | 0.002               |                                                     |      | 0.856 | 0.635               | 0.538               |

E: Number of death, MR: Mortality rate (10 000 person year), Ref: Reference

aHR: Adjusted for age, gender, education, job, marital status, BMI, non-communicable disease history, smoking, alcohol consumption and exercise

HR<sub>1year</sub>: aHR after exclude subjects who died within 1 yr f/u time

HR<sub>2year</sub>: aHR after exclude subjects who died within 2 yr f/u time

**Table 3.** The association between serum *hsCRP* level and cardiovascular disease mortality by gender and non-communicable disease history (NCD<sub>history</sub>) at recruitment

|                 | Cardiovascular disease mortality |      |       |                     |                     | Healthy subjects at recruitment |      |       |                     |                     | Subjects with NCD <sub>history</sub> at recruitment |      |       |                     |                     |
|-----------------|----------------------------------|------|-------|---------------------|---------------------|---------------------------------|------|-------|---------------------|---------------------|-----------------------------------------------------|------|-------|---------------------|---------------------|
|                 | E                                | MR   | aHR   | HR <sub>1year</sub> | HR <sub>2year</sub> | E                               | MR   | aHR   | HR <sub>1year</sub> | HR <sub>2year</sub> | E                                                   | MR   | aHR   | HR <sub>1year</sub> | HR <sub>2year</sub> |
| <b>Total</b>    |                                  |      |       |                     |                     |                                 |      |       |                     |                     |                                                     |      |       |                     |                     |
| ≤1.00           | 167                              | 3.1  | Ref   | Ref                 | Ref                 | 58                              | 1.7  | Ref   | Ref                 | Ref                 | 109                                                 | 5.5  | Ref   | Ref                 | Ref                 |
| 1.01-2.00       | 79                               | 5.8  | 1.35  | 1.37                | 1.23                | 18                              | 2.8  | 1.19  | 1.15                | 0.94                | 64                                                  | 8.4  | 1.42  | 1.46                | 1.36                |
| 2.01-3.00       | 42                               | 10.0 | 2.06  | 2.05                | 2.02                | 6                               | 3.3  | 1.47  | 1.54                | 1.46                | 36                                                  | 15.0 | 2.28  | 2.25                | 2.26                |
| 3.01-10.0       | 39                               | 7.7  | 1.45  | 1.38                | 1.44                | 8                               | 3.7  | 1.44  | 1.50                | 1.70                | 31                                                  | 1.08 | 1.48  | 1.37                | 1.40                |
| >10.0           | 13                               | 9.6  | 1.81  | 1.76                | 1.59                | 3                               | 4.6  | 2.02  | 2.10                | 1.58                | 10                                                  | 14.3 | 1.85  | 1.74                | 1.68                |
| <i>P</i> -trend |                                  |      | 0.001 | 0.002               | 0.004               |                                 |      | 0.130 | 0.100               | 0.162               |                                                     |      | 0.001 | 0.006               | 0.009               |
| <b>Men</b>      |                                  |      |       |                     |                     |                                 |      |       |                     |                     |                                                     |      |       |                     |                     |
| ≤1.00           | 89                               | 5.5  | Ref   | Ref                 | Ref                 | 25                              | 2.7  | Ref   | Ref                 | Ref                 | 64                                                  | 8.9  | Ref   | Ref                 | Ref                 |
| 1.01-2.00       | 45                               | 8.3  | 1.33  | 1.32                | 1.25                | 12                              | 4.8  | 1.30  | 1.22                | 1.22                | 33                                                  | 11.3 | 1.31  | 1.33                | 1.33                |
| 2.01-3.00       | 30                               | 17.6 | 2.70  | 2.67                | 2.53                | 3                               | 4.2  | 1.31  | 1.37                | 1.37                | 27                                                  | 27.3 | 3.05  | 2.99                | 2.99                |
| 3.01-10.0       | 24                               | 11.4 | 1.43  | 1.36                | 1.46                | 6                               | 6.6  | 1.70  | 1.79                | 1.79                | 18                                                  | 15.1 | 1.42  | 1.21                | 1.21                |
| >10.0           | 8                                | 13.0 | 1.90  | 2.02                | 1.70                | 3                               | 10.6 | 3.42  | 3.61                | 3.61                | 5                                                   | 15.0 | 1.59  | 1.62                | 1.62                |
| <i>P</i> -trend |                                  |      | 0.002 | 0.003               | 0.009               |                                 |      | 0.053 | 0.038               | 0.062               |                                                     |      | 0.015 | 0.027               | 0.047               |
| <b>Women</b>    |                                  |      |       |                     |                     |                                 |      |       |                     |                     |                                                     |      |       |                     |                     |
| ≤1.00           | 78                               | 2.1  | Ref   | Ref                 | Ref                 | 33                              | 1.3  | Ref   | Ref                 | Ref                 | 45                                                  | 6.3  | Ref   | Ref                 | Ref                 |
| 1.01-2.00       | 34                               | 4.2  | 1.41  | 1.46                | 1.25                | 6                               | 1.6  | 1.09  | 1.13                | 0.62                | 28                                                  | 9.6  | 1.60  | 1.66                | 1.58                |
| 2.01-3.00       | 12                               | 4.8  | 1.26  | 1.30                | 1.44                | 3                               | 2.7  | 1.65  | 1.70                | 1.86                | 9                                                   | 9.1  | 1.17  | 1.20                | 1.39                |
| 3.01-10.0       | 15                               | 5.1  | 1.51  | 1.45                | 1.44                | 2                               | 1.6  | 1.06  | 1.07                | 1.14                | 13                                                  | 10.9 | 1.75  | 1.64                | 1.65                |
| >10.0           | 5                                | 6.8  | 1.72  | 1.35                | 1.45                | 0                               | -    | -     | -                   | -                   | 5                                                   | 15.0 | 2.51  | 1.91                | 2.07                |
| <i>P</i> -trend |                                  |      | 0.092 | 0.177               | 0.168               |                                 |      | 0.940 | 0.998               | 0.922               |                                                     |      | 0.035 | 0.092               | 0.078               |

E: Number of death, MR: Mortality rate (10 000 person year), Ref: Reference  
aHR: Adjusted for age, gender, education, job, marital status, BMI, non-communicable disease history, smoking, alcohol consumption and exercise  
HR<sub>1year</sub>: aHR after exclude subjects who died within 1 yr f/u time  
HR<sub>2year</sub>: aHR after exclude subjects who died within 2 yr f/u time

## 424 DISCUSSION

425 This study suggests that the risk of all-cause mortality was associated with elevated *hsCRP* levels with a  
426 dose-response manner in both gender among Asian who have reported low *hsCRP* levels compared to other  
427 races, and was not influenced by *NCD<sub>history</sub>*. Otherwise, the association was influenced by gender and *NCD<sub>history</sub>*  
428 although a dose-response association of *hsCRP* with the risk of cancer- and CVD-mortality was also observed in  
429 this population. The level of *hsCRP* was not associated with the risk of cancer- mortality among women with  
430 *NCD<sub>history</sub>*. The risk effect of high *hsCRP* level on CVD mortality was predominantly observed in men with  
431 *NCD<sub>history</sub>*.

432 Several large cohorts[10-12, 14] have suggested that serum *hsCRP* levels may differ according to ethnic  
433 background, with the highest concentrations seen in African Americans, followed by Hispanic, White, Chinese  
434 and Japanese individuals. Although the reason for this ethnic difference is not clearly resolved, genetic  
435 diversity[27], the relatively low BMI in Asian populations and ethnic differences in diet and lifestyle[28] have  
436 been suggested. Although the extent to which these findings adopt to Asian populations has been unclear,  
437 several recent studies[11, 16] conducted in Asia reported a positive association of *hsCRP* with mortality risk.  
438 In this population, the *hsCRP* level was associated with the risk of all-cause mortality in a dose-dependent  
439 manner, even though the level of *hsCRP* was lower than that in the western population. A meta-analysis[29] and  
440 large cohort studies[3-6] supported the robustness of the association regardless of adjusted confounders, the cut-  
441 off point of CRP level and exclusion deaths within the first 2 years of follow-up.

442 The reason for the discrepancy in *hsCRP* levels with respect to gender is not clearly resolved, although  
443 several studies suggested different lifestyle and metabolic risk factors between men and women[30] and genetic  
444 diversity[27]. A high level of serum *hsCRP* in our population was positively related to the increased risk of all-  
445 cause mortality in both genders, supported by several previous studies[8, 16, 31]. Nevertheless, several studies  
446 reported no association of *hsCRP* levels with all-cause mortality was observed in women[7, 16]. In particular,  
447 the association was shown in postmenopausal women only, which might suggest the protective effect of  
448 endogenous female hormones on the low level of *hsCRP*[32]; the average *hsCRP* level was 0.48 and 0.68 mg/L  
449 for premenopausal and postmenopausal women in this study. The protective effect could be supported by the  
450 proposition that estrogen or progesterone might to some extent repress the detrimental effects of chronic  
451 inflammation on tissue damage[33].

452 Inflammation has emerged as an important factor in the processes of NCD, including CVD[17], cancer[18],  
453 type 2 diabetes[20], COPD[19, 34] and fracture[21]. In addition, medications that had taken to treat any specific



1  
2  
3  
4 454 NCD, such as rennin–angiotensin system inhibitors[35] and statins and thiazolidinedione[36], could influence  
5  
6 455 the level of *hsCRP*. The association between *hsCRP* and the mortality risk was not attenuated by  $NCD_{history}$  in  
7  
8 456 either gender in this study, but the statistical significance of the association disappeared in women after  
9  
10 457 sensitivity analysis ( $aHR_{2year}$ ). A dose-response relationship between *hsCRP* level and all-cause mortality risk  
11  
12 458 was pronounced in both genders. On the other hand, the positive association of *hsCRP* with the risk of all-cause  
13  
14 459 mortality risk was significantly observed in only men with  $NCD_{history}$  but not in women with  $NCD_{history}$ . The  
15  
16 460 attenuated effect of  $NCD_{history}$  on the association between *hsCRP* and the risk of cancer-mortality was not  
17  
18 461 observed in men, consistent with results from several studies which reported the associations among healthy  
19  
20 462 men[3] or cancer patients[37, 38] only. Most studies[3, 4, 6, 7, 15, 16, 31, 39] supported that CVD mortality  
21  
22 463 increased with elevated *hsCRP* levels, predominantly in men[4, 7, 15, 16]. Although *hsCRP* levels are lower in  
23  
24 464 our population than in other races, the level of *hsCRP* was positively associated with CVD mortality in men but  
25  
26 465 not in women, similar to previous studies[7, 15, 16, 31, 39]. After stratification by gender and  $NCD_{history}$ , the  
27  
28 466 association between *hsCRP* and the risk of CVD mortality was dominant in subjects with  $NCD_{history}$  in this  
29  
30 467 study. Although many interventional studies have been conducted recently on anti-inflammatory drugs for the  
31  
32 468 prevention of cardiovascular disease, the results are controversial. According to the results of our study, elevated  
33  
34 469 inflammatory markers in people with chronic disease were associated with an increased risk of CVD mortality.  
35  
36 470 This suggests that CVD-mortality in people with chronic diseases might be reduced by use of anti-inflammatory  
37  
38 471 medication.

39 472 This study has several strengths because of the large population-based prospective study; it makes possible 1)  
40  
41 473 to adjust for confounders; 2) to examine sensitivity analysis after excluding death before 1 or 2 years from  
42  
43 474 recruitment; 3) to assess an advanced analysis after stratification by gender and  $NCD_{history}$ ; 4) to examine the  
44  
45 475 association using various cut-off points of *hsCRP* considering low serum *hsCRP* levels in Asian populations;  
46  
47 476 and 5) to evaluate the complex (i.e., nonlinear) hazard functions using restricted cubic splines on the association  
48  
49 477 between continuous *hsCRP* levels and the risk of mortality. In particular, most previous studies excluded  
50  
51 478 subjects with more than 10 mg/L *hsCRP* because of their relatively low sample size or reflecting acute phase  
52  
53 479 reactions of severe inflammation, but we examined the effect of very high *hsCRP* concentration on the risk of  
54  
55 480 mortality because it is possible to be more concerning for these subjects in the future. The *hsCRP* level of this  
56  
57 481 study, in addition, was measured within 18 hours in a single institution to minimize measurement error/bias  
58  
59 482 from institutional variation to avoid bias from measurement or long-term storage before analysis.  
60

1  
2  
3  
4 483 Despite of those strengths, it is also several limitations. First, the use of a single measurement of *hsCRP* at  
5  
6 484 baseline could reflect the inaccurate status of blood *hsCRP* levels in the study participants and increase the  
7  
8 485 instability of *hsCRP* due to random fluctuations over time. Nevertheless, a report [40] on the long-term *hsCRP*  
9  
10 486 variability suggested that the *hsCRP* variability within individual is relatively small and that the variability  
11  
12 487 could not account for the association. Second, our study lacked information on medication use at recruitment  
13  
14 488 and during the follow-up period. Several medications related to NCDs, including statins, angiotensin-converting  
15  
16 489 enzyme inhibitors, fibrates, niacin, thiazolidinedione and estrogen/progestogen hormone, could influence the  
17  
18 490 *hsCRP* level[37]; however, we tried to overcome this limitation through advanced analysis after stratification by  
19  
20 491  $NCD_{history}$ . Third, because there is no available information on hormone-replacement therapy (HRT) among  
21  
22 492 women, which could not examine the influence of HRT on the association of *hsCRP* with the risk of hormone-  
23  
24 493 related cancer or CVD mortality among women, we could not suggest the effect of female hormones on the  
25  
26 494 association. In addition, further studies are needed on the effects of obesity although the inverse relationship  
27  
28 495 between all-cause mortality with obesity in our population was consistent to Wei's report in Asian[41]. On the  
29  
30 496 other hand, the inverse association of alcohol drinking with all-cause mortality couldn't interpret directly  
31  
32 497 because our report wasn't separated the distinguish between mild drinkers and abuse alcohol drinker, which  
33  
34 498 requires additional research for our population in the future.

35 499 In conclusion, the association of *hsCRP* level is dose-responsively increased with the risk of all-cause  
36  
37 500 mortality in men and women (particularly postmenopausal women), which was not influenced by the association  
38  
39 501 was not observed in women with  $NCD_{history}$ . Otherwise, the association of *hsCRP* level with the risk of cancer-  
40  
41 502 and CVD-mortality could be attenuated by gender or  $NCD_{history}$ .

42 503

43 504

44 505 **Figure 1** Flow diagram of analytical sample in current study using Health Examinees cohort.

45 506 **Figure 2** A dose-response association between serum *hsCRP* level and risk of all-cause mortality in all  
46 507 subjects at recruitment.

47 508 **Figure 3** A dose-response association between serum *hsCRP* level and risk of all-cause mortality in healthy  
48 509 subjects at recruitment.

49 510 **Figure 4** A dose-response association between serum *hsCRP* level and risk of all-cause mortality in subjects  
50 511 with non-communicable disease history ( $NCD_{history}$ ) at recruitment.

1  
2  
3  
4 512 **Figure 5** Kaplan-Meier crude survival curves for cancer-mortality according to serum *hsCRP* level in all  
5  
6 513 subjects at recruitment.

7  
8 514 **Figure 6** Kaplan-Meier crude survival curves for cancer-mortality according to serum *hsCRP* level in men at  
9  
10 515 recruitment.

11  
12 516 **Figure 7** Kaplan-Meier crude survival curves for cancer-mortality according to serum *hsCRP* level in women  
13  
14 517 at recruitment.

15  
16 518 **Figure 8** Kaplan-Meier crude survival curves for cancer-mortality according to serum *hsCRP* level in healthy  
17  
18 519 subjects at recruitment.

19  
20 520 **Figure 9** Kaplan-Meier crude survival curves for cancer-mortality according to serum *hsCRP* level in subjects  
21  
22 521 with non-communicable disease history (NCD<sub>history</sub>) at recruitment.

23  
24 522 **Figure 10** Kaplan-Meier crude survival curves for cardiovascular disease mortality according to serum *hsCRP*  
25  
26 523 level in all subjects at recruitment.

27  
28 524 **Figure 11** Kaplan-Meier crude survival curves for cardiovascular disease mortality according to serum *hsCRP*  
29  
30 525 level in men at recruitment.

31  
32 526 **Figure 12** Kaplan-Meier crude survival curves for cardiovascular disease mortality according to serum *hsCRP*  
33  
34 527 level in women at recruitment.

35  
36 528 **Figure 13** Kaplan-Meier crude survival curves for cardiovascular disease mortality according to serum *hsCRP*  
37  
38 529 level in healthy subjects at recruitment.

39  
40 530 **Figure 14** Kaplan-Meier crude survival curves for cardiovascular disease mortality according to serum *hsCRP*  
41  
42 531 level in subjects with non-communicable disease history (NCD<sub>history</sub>) at recruitment.

43 532

44 533

45  
46 534 **Contributors**

47  
48 535 SAL, XS and DK: designed and conducted the research, SAL and SOK: analyzed the data and performed the  
49  
50 536 statistical analyses; HP and JKL: managed data mining and collection; SAL: wrote the manuscript and had primary  
51  
52 537 responsibility for the final content of the manuscript; and all authors: read and approved the final manuscript.

53  
54 538

55  
56 539 **Funding** None.

57  
58 540

59  
60 541 **Competing interests** None declared.

542 **Patient consent for publication** Not required.

543 **Ethics approval** The Institutional Review Board of the Seoul National University Hospital, Seoul, Korea,  
544 approved it for statistical analysis (IRB No. E-1503-103-657).

545

546 **Provenance and peer review** Not commissioned; externally peer reviewed.

547 **Data availability statement**

548 No additional data available.

549

550

## 551 REFERENCES

552 1 Pepys MB, Hirschfield GM. C-reactive protein: a critical update. *The Journal of clinical*  
553 *investigation* 2003;**111**:1805-12.

554 2 Elias-Smale SE, Kardys I, Oudkerk M, *et al.* C-reactive protein is related to extent and  
555 progression of coronary and extra-coronary atherosclerosis; results from the Rotterdam study.  
556 *Atherosclerosis* 2007;**195**:e195-202.

557 3 Koenig W, Khuseyinova N, Baumert J, *et al.* Prospective study of high-sensitivity C-reactive  
558 protein as a determinant of mortality: results from the MONICA/KORA Augsburg Cohort Study,  
559 1984-1998. *Clinical chemistry* 2008;**54**:335-42.

560 4 Ahmadi-Abhari S, Luben RN, Wareham NJ, *et al.* Seventeen year risk of all-cause and  
561 cause-specific mortality associated with C-reactive protein, fibrinogen and leukocyte count in men  
562 and women: the EPIC-Norfolk study. *European journal of epidemiology* 2013;**28**:541-50.

563 5 Kuoppamaki M, Salminen M, Vahlberg T, *et al.* High sensitive C-reactive protein (hsCRP),  
564 cardiovascular events and mortality in the aged: a prospective 9-year follow-up study. *Archives of*  
565 *gerontology and geriatrics* 2015;**60**:112-7.

566 6 Zuo H, Ueland PM, Ulvik A, *et al.* Plasma Biomarkers of Inflammation, the Kynurenine  
567 Pathway, and Risks of All-Cause, Cancer, and Cardiovascular Disease Mortality: The Hordaland  
568 Health Study. *American journal of epidemiology* 2016;**183**:249-58.

569 7 Nisa H, Hirata A, Kohno M, *et al.* High-Sensitivity C-Reactive Protein and Risks of All-  
570 Cause and Cause-Specific Mortality in a Japanese Population. *Asian Pacific journal of cancer*  
571 *prevention : APJCP* 2016;**17**:2643-8.

572 8 Li Y, Zhong X, Cheng G, *et al.* Hs-CRP and all-cause, cardiovascular, and cancer mortality  
573 risk: A meta-analysis. *Atherosclerosis* 2017;**259**:75-82.

574 9 Vasto S, Candore G, Balistreri CR, *et al.* Inflammatory networks in ageing, age-related  
575 diseases and longevity. *Mechanisms of ageing and development* 2007;**128**:83-91.

- 1  
2  
3  
4 576 10 Kelley-Hedgepeth A, Lloyd-Jones DM, Colvin A, *et al.* Ethnic differences in C-reactive  
5 577 protein concentrations. *Clinical chemistry* 2008;**54**:1027-37.
- 7 578 11 Albert MA, Glynn RJ, Buring J, *et al.* C-reactive protein levels among women of various  
8 579 ethnic groups living in the United States (from the Women's Health Study). *The American journal of*  
9 580 *cardiology* 2004;**93**:1238-42.
- 12 581 12 Khera A, McGuire DK, Murphy SA, *et al.* Race and gender differences in C-reactive protein  
13 582 levels. *Journal of the American College of Cardiology* 2005;**46**:464-9.
- 15 583 13 Lakoski SG, Cushman M, Criqui M, *et al.* Gender and C-reactive protein: data from the  
16 584 Multiethnic Study of Atherosclerosis (MESA) cohort. *American heart journal* 2006;**152**:593-8.
- 18 585 14 Matthews KA, Sowers MF, Derby CA, *et al.* Ethnic differences in cardiovascular risk factor  
19 586 burden among middle-aged women: Study of Women's Health Across the Nation (SWAN). *American*  
20 587 *heart journal* 2005;**149**:1066-73.
- 23 588 15 Lee JH, Yeom H, Kim HC, *et al.* C-reactive Protein Concentration Is Associated With a  
24 589 Higher Risk of Mortality in a Rural Korean Population. *Journal of preventive medicine and public*  
25 590 *health = Yebang Uihakhoe chi* 2016;**49**:275-87.
- 28 591 16 Sung KC, Ryu S, Chang Y, *et al.* C-reactive protein and risk of cardiovascular and all-cause  
29 592 mortality in 268 803 East Asians. *European heart journal* 2014;**35**:1809-16.
- 31 593 17 Kengne AP, Batty GD, Hamer M, *et al.* Association of C-reactive protein with  
32 594 cardiovascular disease mortality according to diabetes status: pooled analyses of 25,979 participants  
33 595 from four U.K. prospective cohort studies. *Diabetes care* 2012;**35**:396-403.
- 36 596 18 Heikkila K, Ebrahim S, Lawlor DA. A systematic review of the association between  
37 597 circulating concentrations of C reactive protein and cancer. *Journal of epidemiology and community*  
38 598 *health* 2007;**61**:824-33.
- 40 599 19 Dahl M, Vestbo J, Lange P, *et al.* C-reactive protein as a predictor of prognosis in chronic  
41 600 obstructive pulmonary disease. *American journal of respiratory and critical care medicine*  
42 601 2007;**175**:250-5.
- 45 602 20 Wang X, Bao W, Liu J, *et al.* Inflammatory markers and risk of type 2 diabetes: a systematic  
46 603 review and meta-analysis. *Diabetes care* 2013;**36**:166-75.
- 48 604 21 Ishii S, Cauley JA, Greendale GA, *et al.* C-reactive protein, bone strength, and nine-year  
49 605 fracture risk: data from the Study of Women's Health Across the Nation (SWAN). *Journal of bone*  
50 606 *and mineral research : the official journal of the American Society for Bone and Mineral Research*  
51 607 2013;**28**:1688-98.
- 55 608 22 Kim Y, Han BG, Ko GESg. Cohort Profile: The Korean Genome and Epidemiology Study  
56 609 (KoGES) Consortium. *International journal of epidemiology* 2017;**46**:1350.
- 58 610 23 Shin S, Lee HW, Kim CE, *et al.* Egg Consumption and Risk of Metabolic Syndrome in  
59 611 Korean Adults: Results from the Health Examinees Study. *Nutrients* 2017;**9**.

- 1  
2  
3  
4 612 24 Pan WH, Yeh WT. How to define obesity? Evidence-based multiple action points for public  
5 613 awareness, screening, and treatment: an extension of Asian-Pacific recommendations. *Asia Pacific*  
6 614 *journal of clinical nutrition* 2008;**17**:370-4.  
7  
8 615 25 National Cholesterol Education Program Expert Panel on Detection E, Treatment of High  
9 616 Blood Cholesterol in A. Third Report of the National Cholesterol Education Program (NCEP) Expert  
10 617 Panel on Detection, Evaluation, and Treatment of High Blood Cholesterol in Adults (Adult Treatment  
11 618 Panel III) final report. *Circulation* 2002;**106**:3143-421.  
12  
13 619 26 Heinzl H, Kaider A. Gaining more flexibility in Cox proportional hazards regression models  
14 620 with cubic spline functions. *Computer methods and programs in biomedicine* 1997;**54**:201-8.  
15  
16 621 27 MacGregor AJ, Gallimore JR, Spector TD, *et al.* Genetic effects on baseline values of C-  
17 622 reactive protein and serum amyloid a protein: a comparison of monozygotic and dizygotic twins.  
18 623 *Clinical chemistry* 2004;**50**:130-4.  
19  
20 624 28 Ledue TB, Rifai N. Preanalytic and analytic sources of variations in C-reactive protein  
21 625 measurement: implications for cardiovascular disease risk assessment. *Clinical chemistry*  
22 626 2003;**49**:1258-71.  
23  
24 627 29 Emerging Risk Factors C, Kaptoge S, Di Angelantonio E, *et al.* C-reactive protein  
25 628 concentration and risk of coronary heart disease, stroke, and mortality: an individual participant meta-  
26 629 analysis. *Lancet* 2010;**375**:132-40.  
27  
28 630 30 Lee YJ, Lee JH, Shin YH, *et al.* Gender difference and determinants of C-reactive protein  
29 631 level in Korean adults. *Clinical chemistry and laboratory medicine* 2009;**47**:863-9.  
30  
31 632 31 Doran B, Zhu W, Muennig P. Gender differences in cardiovascular mortality by C-reactive  
32 633 protein level in the United States: evidence from the National Health and Nutrition Examination  
33 634 Survey III. *American heart journal* 2013;**166**:45-51.  
34  
35 635 32 Gaskins AJ, Wilchesky M, Mumford SL, *et al.* Endogenous reproductive hormones and C-  
36 636 reactive protein across the menstrual cycle: the BioCycle Study. *American journal of epidemiology*  
37 637 2012;**175**:423-31.  
38  
39 638 33 Gilliver SC. Sex steroids as inflammatory regulators. *The Journal of steroid biochemistry*  
40 639 *and molecular biology* 2010;**120**:105-15.  
41  
42 640 34 Man SF, Connett JE, Anthonisen NR, *et al.* C-reactive protein and mortality in mild to  
43 641 moderate chronic obstructive pulmonary disease. *Thorax* 2006;**61**:849-53.  
44  
45 642 35 Di Napoli M, Papa F. Angiotensin-converting enzyme inhibitor use is associated with  
46 643 reduced plasma concentration of C-reactive protein in patients with first-ever ischemic stroke. *Stroke*  
47 644 2003;**34**:2922-9.  
48  
49 645 36 Sidhu JS, Cowan D, Kaski JC. The effects of rosiglitazone, a peroxisome proliferator-  
50 646 activated receptor-gamma agonist, on markers of endothelial cell activation, C-reactive protein, and  
51  
52  
53  
54  
55  
56  
57  
58  
59  
60

- 1  
2  
3  
4 647 fibrinogen levels in non-diabetic coronary artery disease patients. *Journal of the American College of*  
5 648 *Cardiology* 2003;**42**:1757-63.
- 7 649 37 Heikkila K, Ebrahim S, Rumley A, *et al.* Associations of circulating C-reactive protein and  
8 650 interleukin-6 with survival in women with and without cancer: findings from the British Women's  
9 651 Heart and Health Study. *Cancer epidemiology, biomarkers & prevention : a publication of the*  
10 652 *American Association for Cancer Research, cosponsored by the American Society of Preventive*  
11 653 *Oncology* 2007;**16**:1155-9.
- 15 654 38 Marsik C, Kazemi-Shirazi L, Schickbauer T, *et al.* C-reactive protein and all-cause mortality  
16 655 in a large hospital-based cohort. *Clinical chemistry* 2008;**54**:343-9.
- 18 656 39 Proctor MJ, McMillan DC, Horgan PG, *et al.* Systemic inflammation predicts all-cause  
19 657 mortality: a glasgow inflammation outcome study. *PloS one* 2015;**10**:e0116206.
- 21 658 40 Chen TH, Gona P, Sutherland PA, *et al.* Long-term C-reactive protein variability and  
22 659 prediction of metabolic risk. *The American journal of medicine* 2009;**122**:53-61.
- 25 660 41 Zheng W, McLerran DF, Rolland B, *et al.* Association between Body-Mass Index and Risk  
26 661 of Death in More Than 1 Million Asians, *N Engl J Med* 2011; 364:719-729.
- 28 662

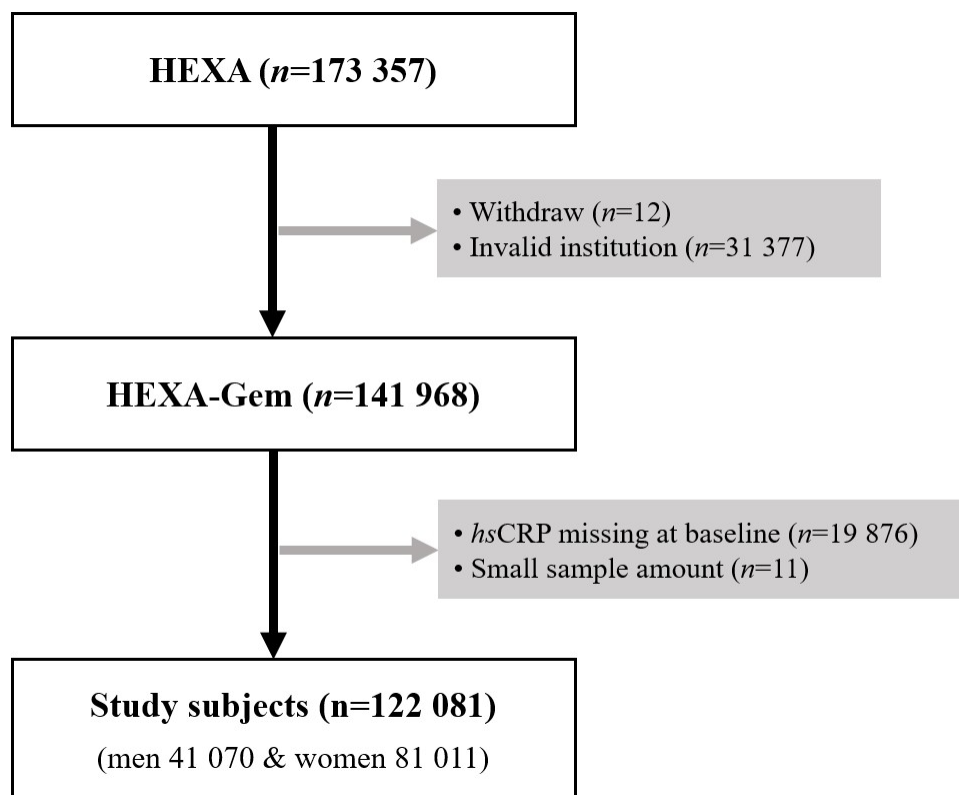

Figure 1 Flow diagram of analytical sample in current study using Health Examinees cohort.  
HEXA: Health Examinees, hsCRP: High sensitivity C-reactive protein



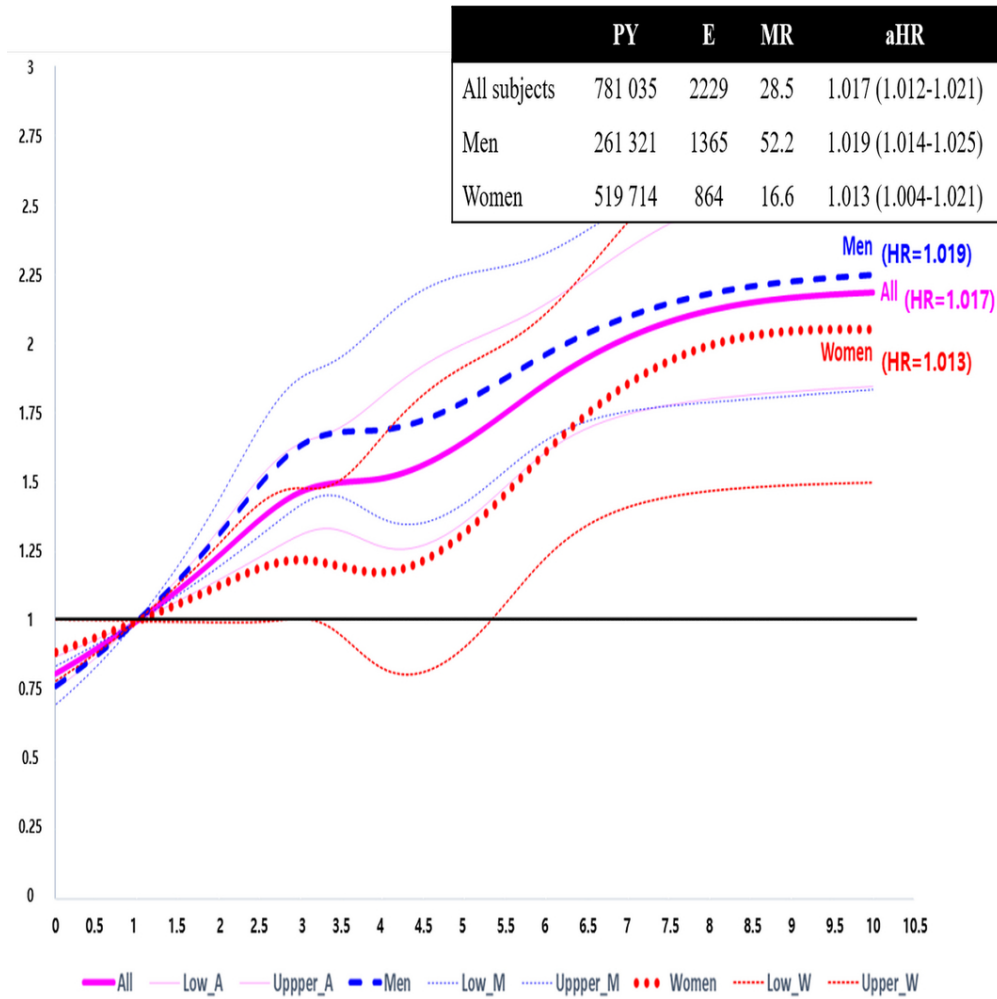

Figure 2 A dose-response association between serum hsCRP level and risk of all-cause mortality in all subjects at recruitment.

PY: Person-year, E: Number of death, MR: Mortality rate (10 000 person year)

aHR: Adjusted for age, gender, education, job, marital status, BMI, non-communicable disease history, smoking, alcohol consumption and exercise

Low\_A and Upper\_A: 95%CI for all subjects

Low\_M and Upper\_M: 95%CI for men

Low\_W and Upper\_W: 95%CI for women

90x90mm (300 x 300 DPI)

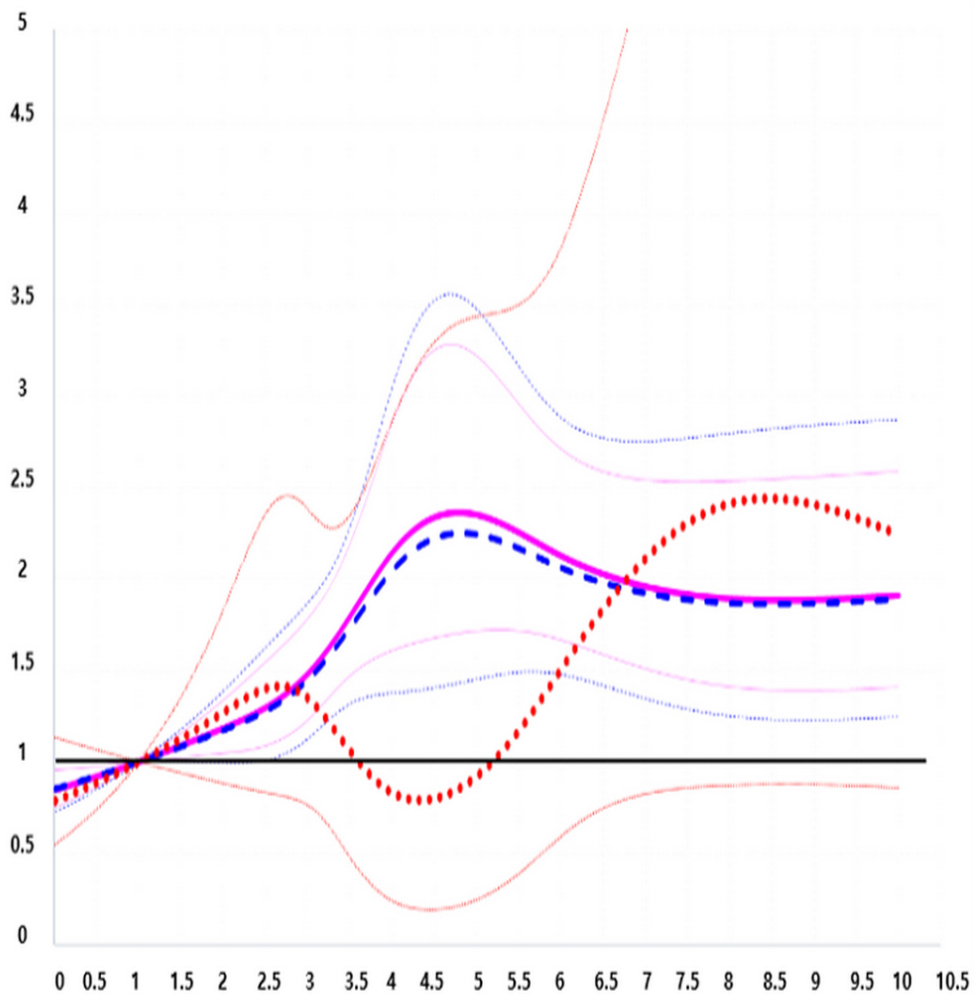

Figure 3 A dose-response association between serum hsCRP level and risk of all-cause mortality in healthy subjects at recruitment.

Low\_A and Upper\_A: 95%CI for all subjects

Low\_M and Upper\_M: 95%CI for men

Low\_W and Upper\_W: 95%CI for women

90x90mm (300 x 300 DPI)

1  
2  
3  
4  
5  
6  
7  
8  
9  
10  
11  
12  
13  
14  
15  
16  
17  
18  
19  
20  
21  
22  
23  
24  
25  
26  
27  
28  
29  
30  
31  
32  
33  
34  
35  
36  
37  
38  
39  
40  
41  
42  
43  
44  
45  
46  
47  
48  
49  
50  
51  
52  
53  
54  
55  
56  
57  
58  
59  
60

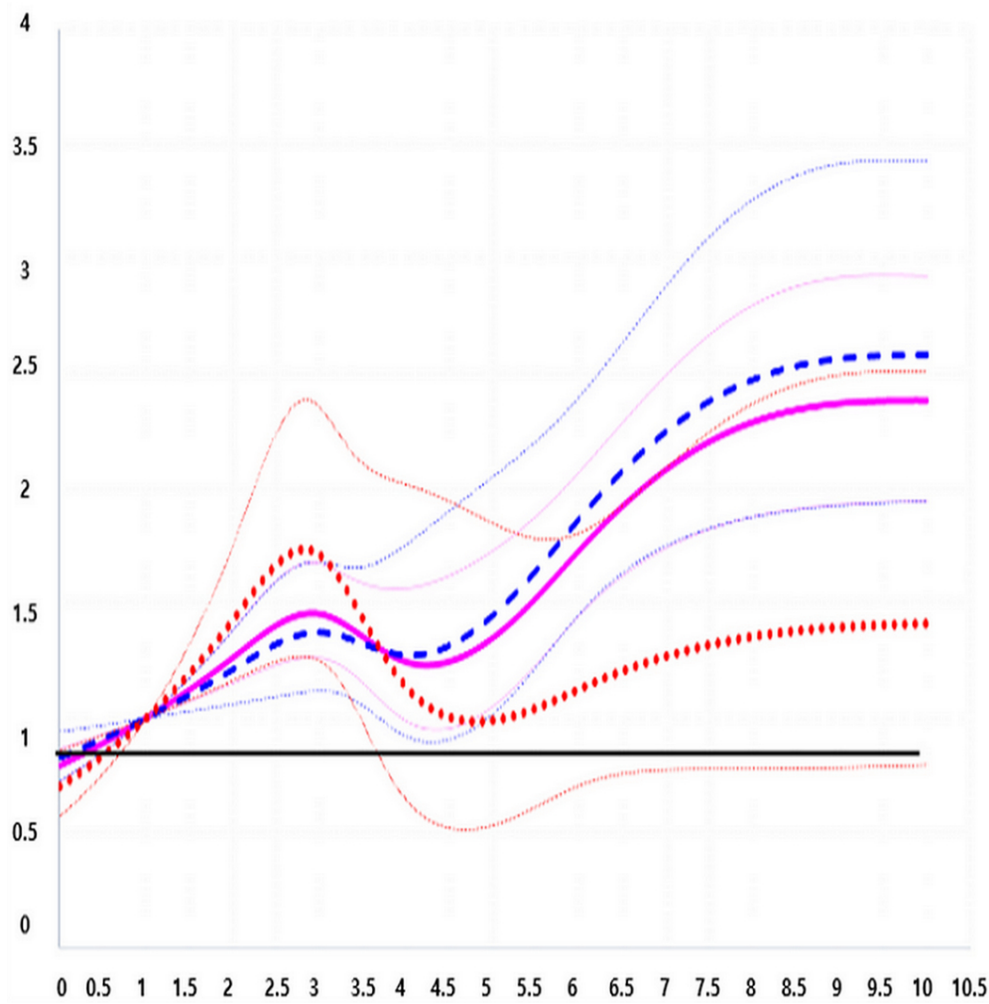

Figure 4 A dose-response association between serum hsCRP level and risk of all-cause mortality in subjects with non-communicable disease history (NCDhistory) at recruitment.  
Low\_A and Upper\_A: 95%CI for all subjects  
Low\_M and Upper\_M: 95%CI for men  
Low\_W and Upper\_W: 95%CI for women  
90x90mm (300 x 300 DPI)

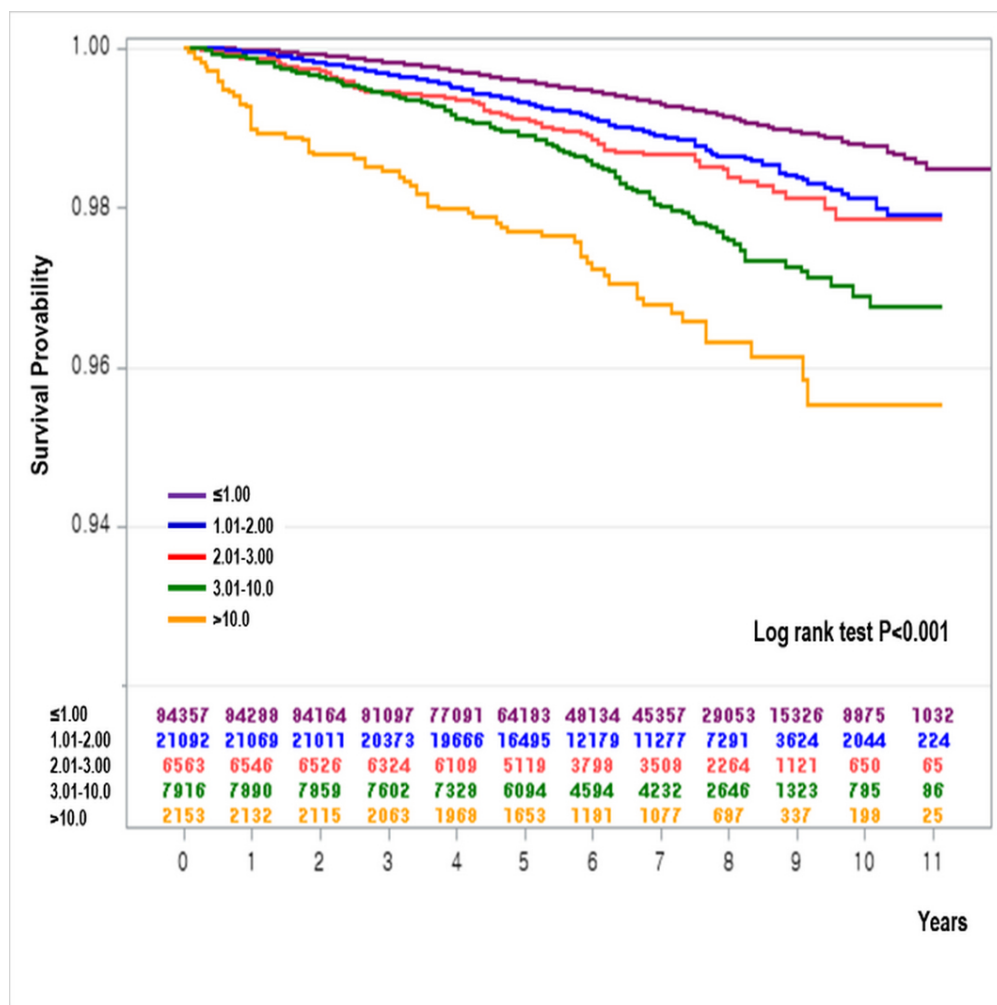

Figure 5 Kaplan-Meier crude survival curves for cancer-mortality according to serum hsCRP level in all subjects at recruitment.

90x90mm (300 x 300 DPI)

1  
2  
3  
4  
5  
6  
7  
8  
9  
10  
11  
12  
13  
14  
15  
16  
17  
18  
19  
20  
21  
22  
23  
24  
25  
26  
27  
28  
29  
30  
31  
32  
33  
34  
35  
36  
37  
38  
39  
40  
41  
42  
43  
44  
45  
46  
47  
48  
49  
50  
51  
52  
53  
54  
55  
56  
57  
58  
59  
60

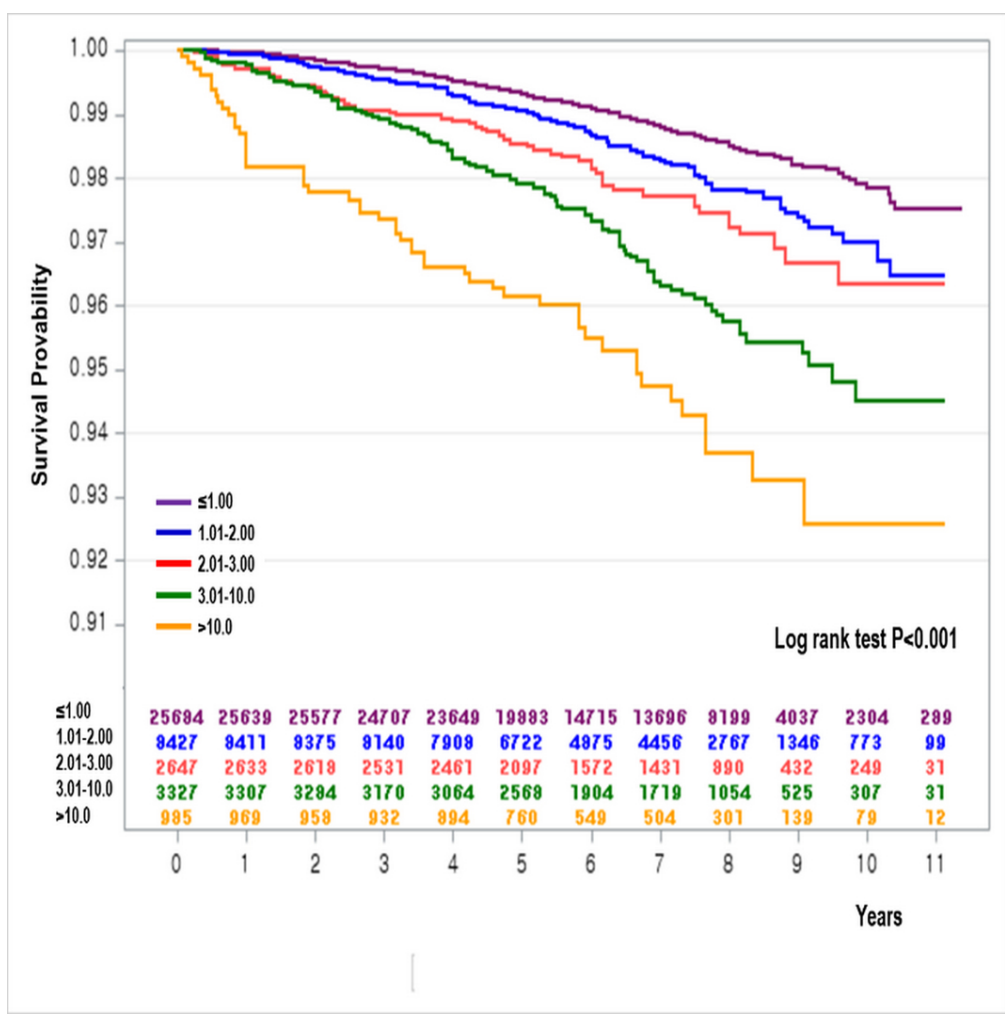

Figure 6 Kaplan-Meier crude survival curves for cancer-mortality according to serum hsCRP level in men at recruitment.

90x90mm (300 x 300 DPI)

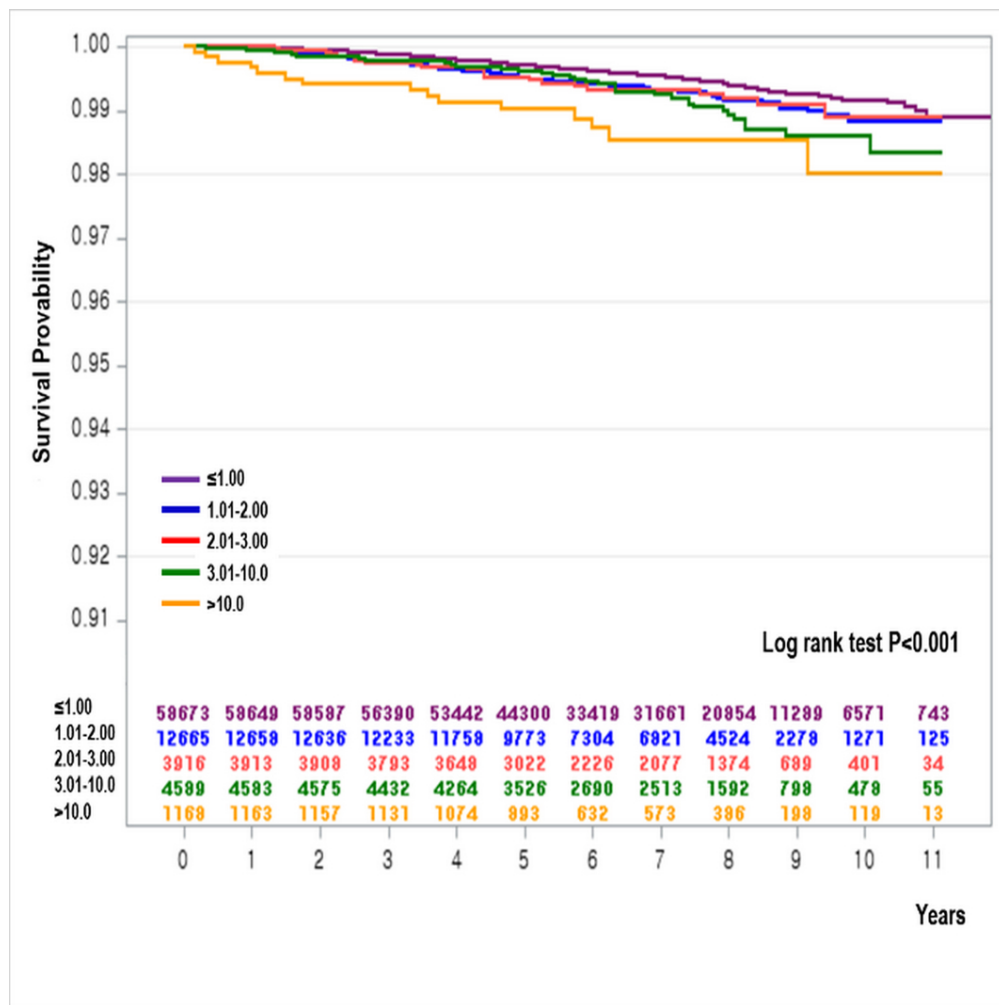

Figure 7 Kaplan-Meier crude survival curves for cancer-mortality according to serum hsCRP level in women at recruitment.

90x90mm (300 x 300 DPI)

1  
2  
3  
4  
5  
6  
7  
8  
9  
10  
11  
12  
13  
14  
15  
16  
17  
18  
19  
20  
21  
22  
23  
24  
25  
26  
27  
28  
29  
30  
31  
32  
33  
34  
35  
36  
37  
38  
39  
40  
41  
42  
43  
44  
45  
46  
47  
48  
49  
50  
51  
52  
53  
54  
55  
56  
57  
58  
59  
60

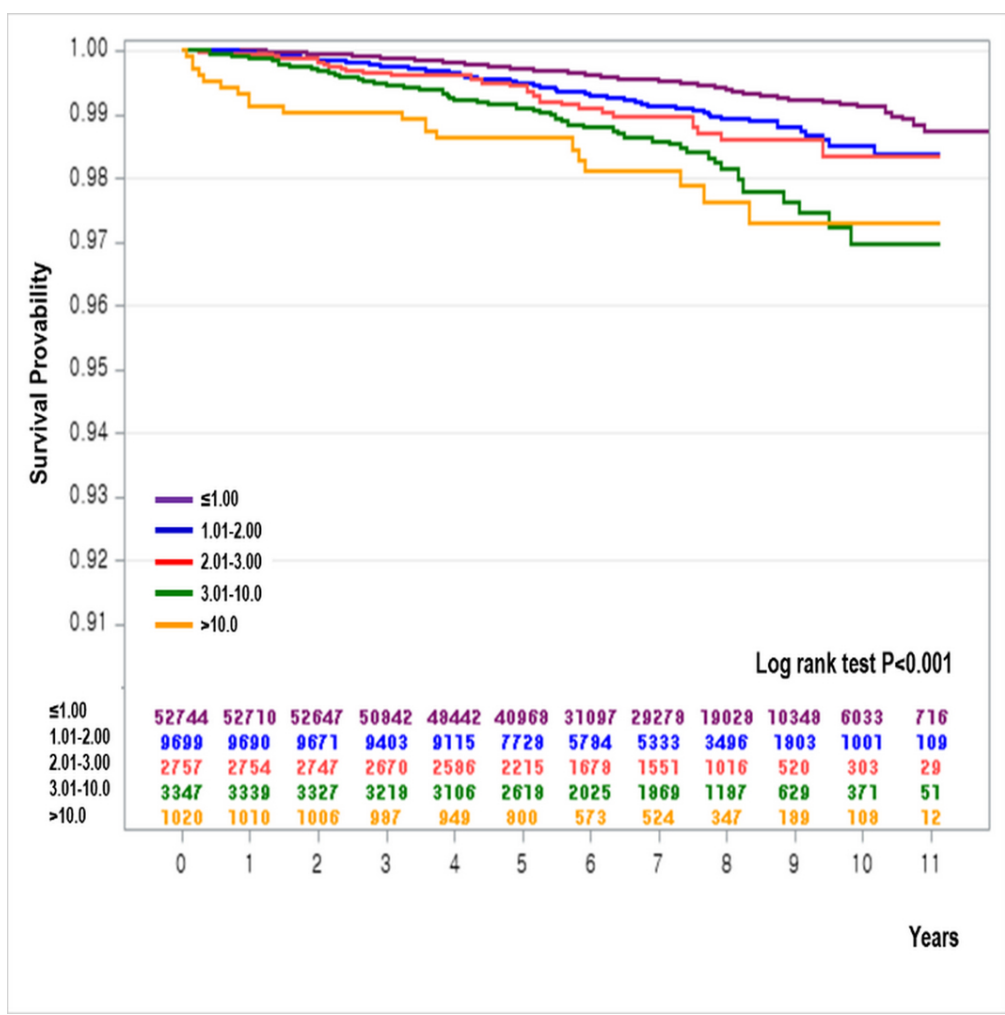

Figure 8 Kaplan-Meier crude survival curves for cancer-mortality according to serum hsCRP level in healthy subjects at recruitment.

90x90mm (300 x 300 DPI)

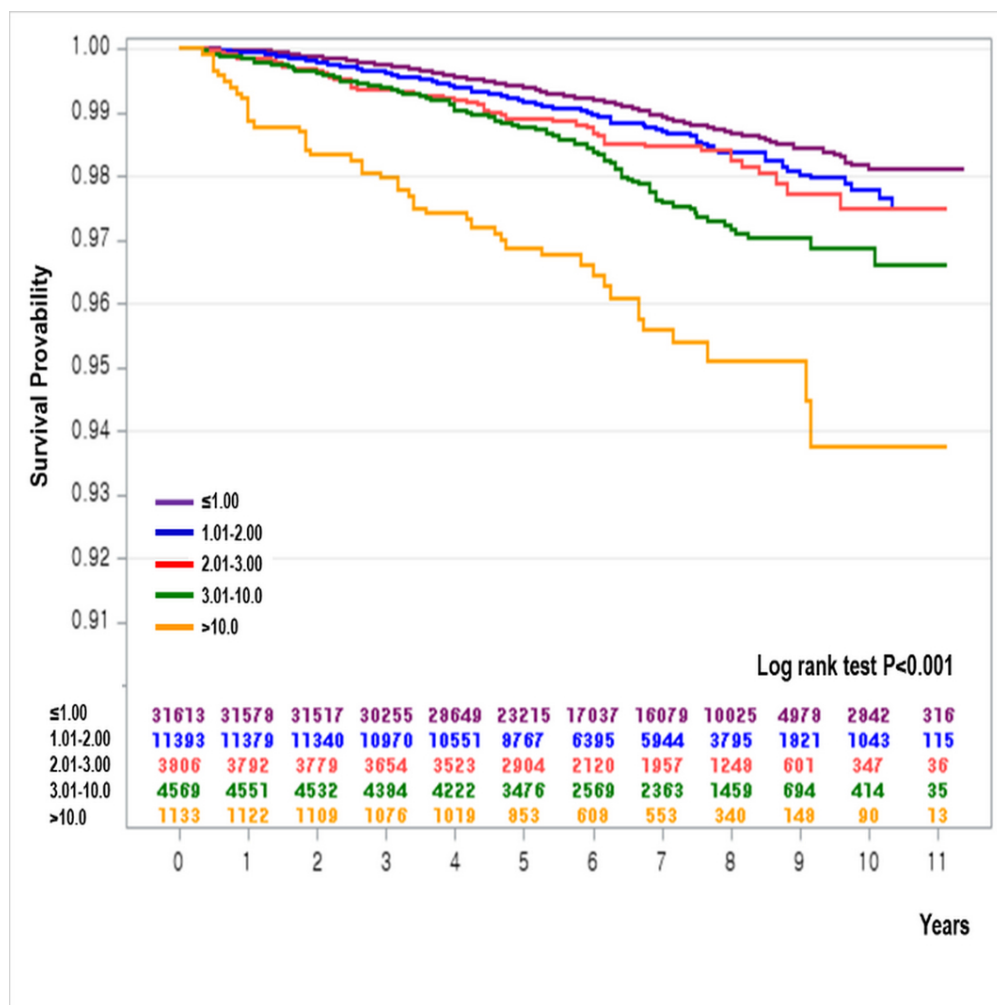

Figure 9 Kaplan-Meier crude survival curves for cancer-mortality according to serum hsCRP level in subjects with non-communicable disease history (NCDhistory) at recruitment.

90x90mm (300 x 300 DPI)



1  
2  
3  
4  
5  
6  
7  
8  
9  
10  
11  
12  
13  
14  
15  
16  
17  
18  
19  
20  
21  
22  
23  
24  
25  
26  
27  
28  
29  
30  
31  
32  
33  
34  
35  
36  
37  
38  
39  
40  
41  
42  
43  
44  
45  
46  
47  
48  
49  
50  
51  
52  
53  
54  
55  
56  
57  
58  
59  
60

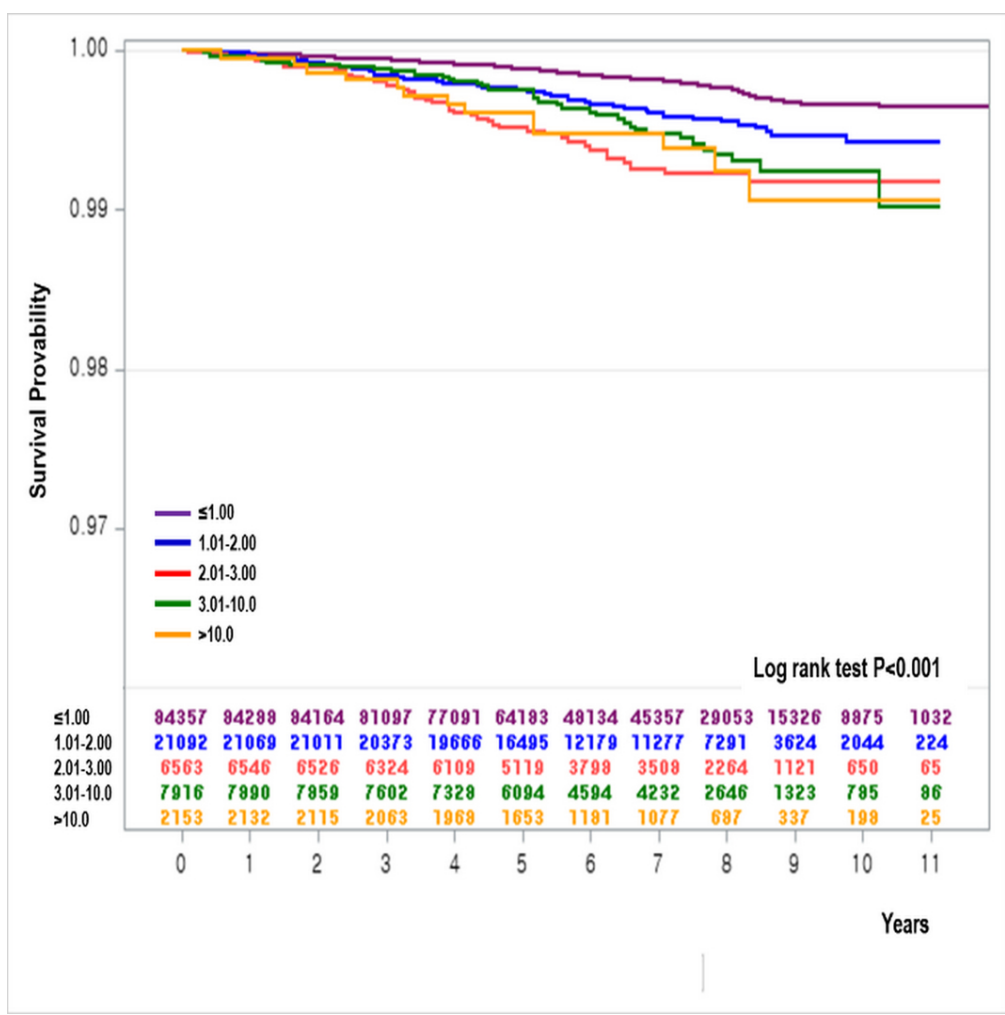

Figure 10 Kaplan-Meier crude survival curves for cardiovascular disease mortality according to serum hsCRP level in all subjects at recruitment.

90x90mm (300 x 300 DPI)

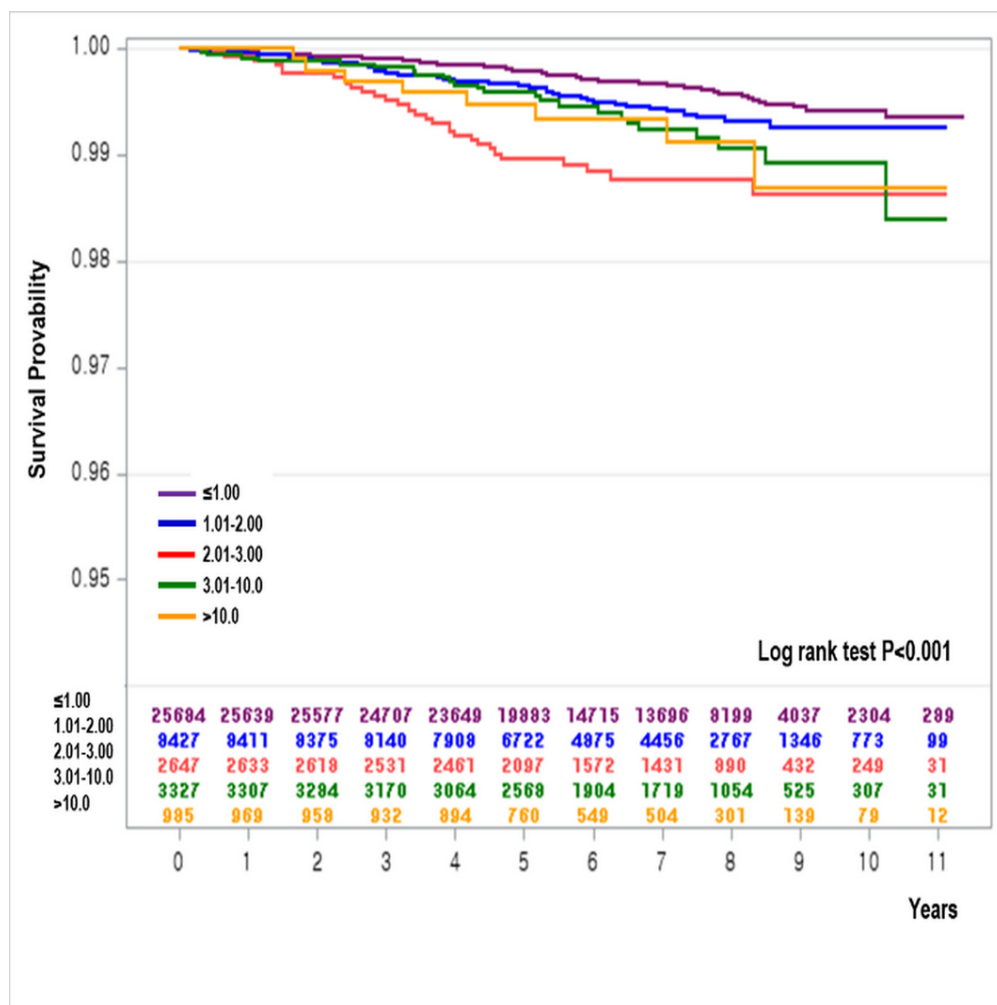

Figure 11 Kaplan-Meier crude survival curves for cardiovascular disease mortality according to serum hsCRP level in men at recruitment.

90x90mm (300 x 300 DPI)

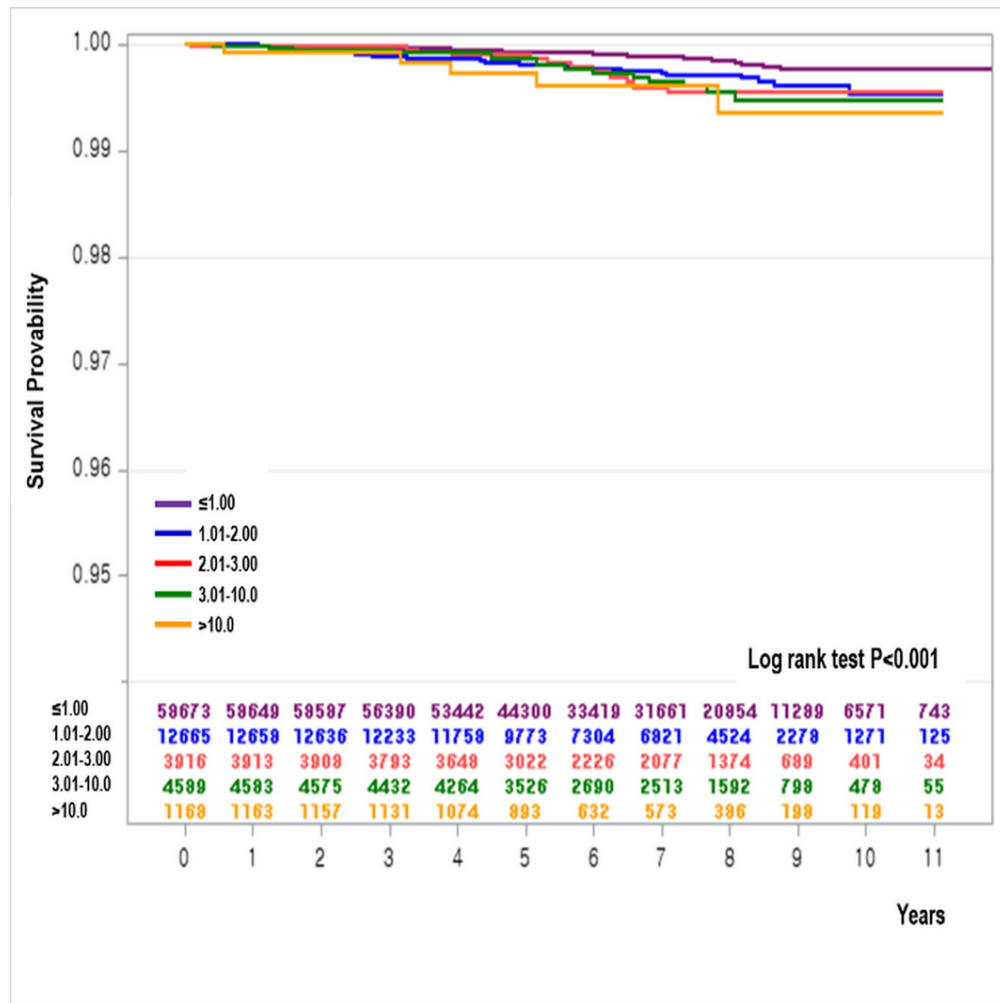

Figure 12 Kaplan-Meier crude survival curves for cardiovascular disease mortality according to serum hsCRP level in women at recruitment.

90x90mm (300 x 300 DPI)

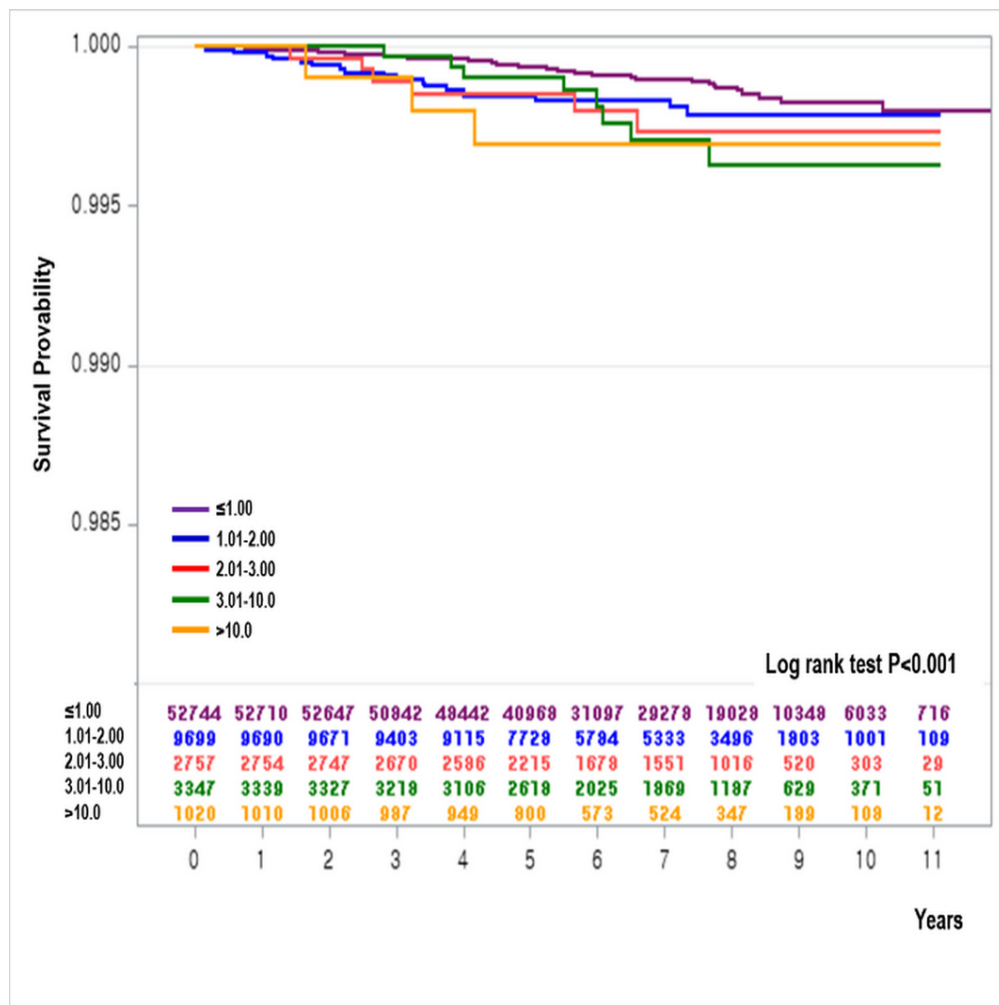

Figure 13 Kaplan-Meier crude survival curves for cardiovascular disease mortality according to serum hsCRP level in healthy subjects at recruitment.

90x90mm (300 x 300 DPI)

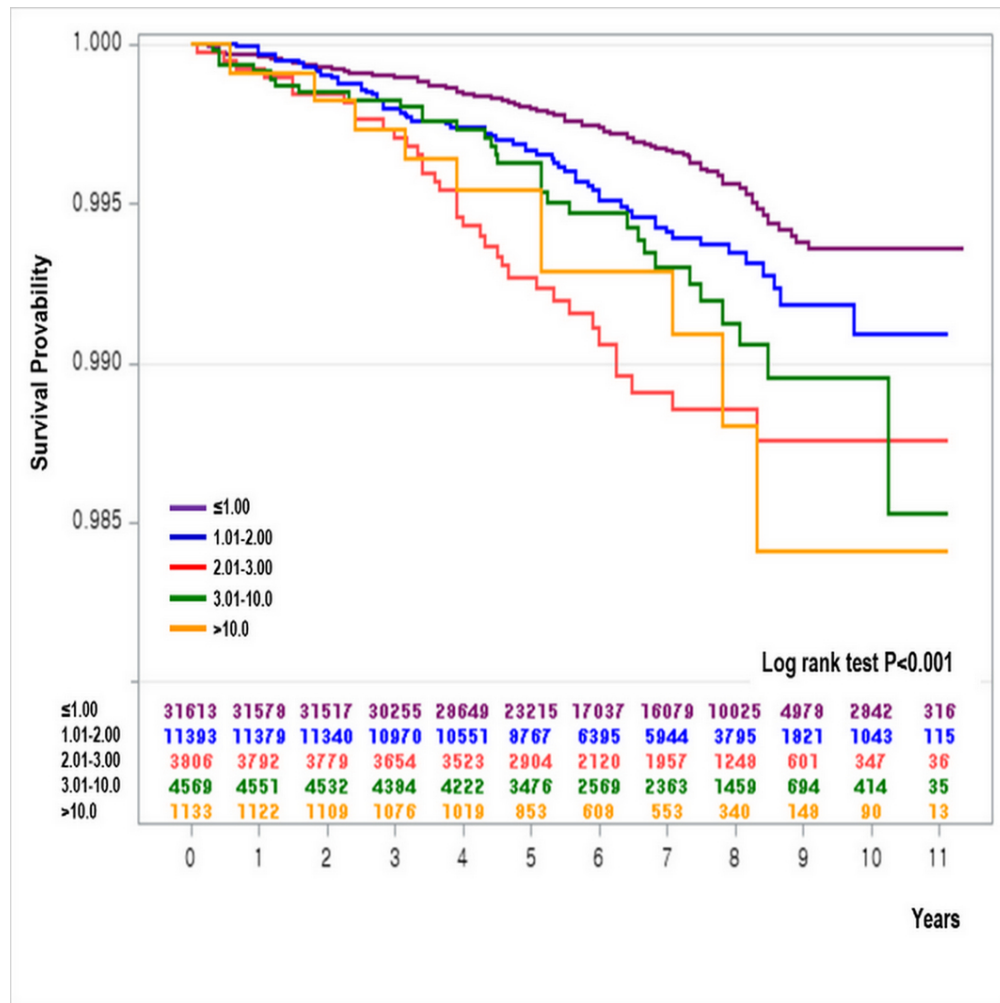

Figure 14 Kaplan-Meier crude survival curves for cardiovascular disease mortality according to serum hsCRP level in subjects with non-communicable disease history (NCDhistory) at recruitment.

90x90mm (300 x 300 DPI)

**Supplement 1.** The association of serum *hsCRP* level with the risk of all-cause mortality

|                      | PY      | E    | MR    | aHR                 | HR <sub>1year</sub> | HR <sub>2year</sub> |
|----------------------|---------|------|-------|---------------------|---------------------|---------------------|
| <b>All subjects</b>  |         |      |       |                     |                     |                     |
| Continuous           | 781 035 | 2229 | 28.5  | 1.017 (1.012-1.021) | 1.015 (1.010-1.020) | 1.014 (1.009-1.019) |
| ≤1.00                | 539 271 | 1153 | 21.4  | Reference           | Reference           | Reference           |
| 1.01-1.50            | 90 911  | 308  | 33.9  | 1.26 (1.10-1.45)    | 1.27 (1.10-1.45)    | 1.21 (1.04-1.40)    |
| 1.51-2.00            | 44 615  | 163  | 36.5  | 1.28 (1.08-1.53)    | 1.28 (1.07-1.53)    | 1.26 (1.04-1.52)    |
| 2.01-2.50            | 25 139  | 117  | 46.5  | 1.53 (1.25-1.89)    | 1.51 (1.22-1.87)    | 1.49 (1.19-1.87)    |
| 2.51-3.00            | 16 996  | 72   | 42.4  | 1.39 (1.08-1.80)    | 1.31 (1.00-1.72)    | 1.23 (0.92-1.65)    |
| 3.01-4.00            | 19 667  | 103  | 52.4  | 1.61 (1.29-2.01)    | 1.62 (1.29-2.03)    | 1.64 (1.30-2.08)    |
| 4.01-6.00            | 17 933  | 102  | 56.9  | 1.84 (1.48-2.28)    | 1.77 (1.41-2.21)    | 1.70 (1.34-2.16)    |
| 6.01-10.00           | 13 019  | 88   | 67.6  | 2.02 (1.59-2.56)    | 1.96 (1.54-2.50)    | 1.93 (1.49-2.51)    |
| >10.0                | 13 484  | 123  | 91.2  | 2.59 (2.12-3.16)    | 2.41 (1.95-2.97)    | 2.26 (1.80-2.84)    |
| <i>P</i> -trend      |         |      |       | <.001               | <.001               | <.001               |
| <b>Men</b>           |         |      |       |                     |                     |                     |
| Continuous           | 261 321 | 1365 | 52.2  | 1.019 (1.014-1.025) | 1.017 (1.011-1.023) | 1.017 (1.010-1.023) |
| ≤1.00                | 163 068 | 638  | 39.1  | Reference           | Reference           | Reference           |
| 1.01-1.50            | 36 094  | 190  | 52.6  | 1.27 (1.07-1.51)    | 1.28 (1.07-1.53)    | 1.22 (1.01-1.47)    |
| 1.51-2.00            | 17 946  | 103  | 57.4  | 1.34 (1.07-1.67)    | 1.34 (1.07-1.68)    | 1.35 (1.06-1.72)    |
| 2.01-2.50            | 10 059  | 77   | 76.5  | 1.56 (1.20-2.03)    | 1.53 (1.16-2.00)    | 1.47 (1.10-1.96)    |
| 2.51-3.00            | 6959    | 54   | 77.6  | 1.71 (1.27-2.29)    | 1.57 (1.15-2.15)    | 1.46 (1.04-2.05)    |
| 3.01-4.00            | 8177    | 77   | 94.2  | 1.88 (1.45-2.43)    | 1.94 (1.50-2.52)    | 1.92 (1.46-2.54)    |
| 4.01-6.00            | 7425    | 75   | 101.0 | 2.05 (1.59-2.63)    | 1.95 (1.49-2.53)    | 1.91 (1.44-2.52)    |
| 6.01-10.00           | 5456    | 59   | 108.1 | 2.03 (1.52-2.73)    | 1.96 (1.44-2.66)    | 1.85 (1.33-2.58)    |
| >10.0                | 6137    | 92   | 149.9 | 2.84 (2.25-3.58)    | 2.66 (2.08-3.39)    | 2.58 (1.99-3.35)    |
| <i>P</i> -trend      |         |      |       | <.001               | <.001               | <.001               |
| <b>Women</b>         |         |      |       |                     |                     |                     |
| Continuous           | 519 714 | 864  | 16.6  | 1.013 (1.004-1.021) | 1.011(1.002-1.021)  | 1.010 (0.999-1.021) |
| ≤1.00                | 376 203 | 515  | 13.7  | Reference           | Reference           | Reference           |
| 1.01-1.50            | 54 817  | 118  | 21.5  | 1.28 (1.03-1.59)    | 1.27 (1.02-1.58)    | 1.23 (0.97-1.56)    |
| 1.51-2.00            | 26 669  | 60   | 22.5  | 1.23 (0.92-1.64)    | 1.21 (0.90-1.63)    | 1.14 (0.83-1.56)    |
| 2.01-2.50            | 15 080  | 40   | 26.5  | 1.52 (1.09-2.14)    | 1.52 (1.08-2.15)    | 1.56 (1.09-2.24)    |
| 2.51-3.00            | 10 037  | 18   | 17.9  | 0.84 (0.49-1.44)    | 0.87 (0.51-1.48)    | 0.83 (0.46-1.47)    |
| 3.01-4.00            | 11 490  | 26   | 22.6  | 1.16 (0.75-1.81)    | 1.09 (0.68-1.72)    | 1.21 (0.76-1.93)    |
| 4.01-6.00            | 10 508  | 27   | 25.7  | 1.48 (0.99-2.22)    | 1.47 (0.97-2.22)    | 1.36 (0.86-2.14)    |
| 6.01-10.00           | 7563    | 29   | 38.3  | 2.00 (1.34-2.98)    | 1.98 (1.32-2.98)    | 2.10 (1.39-3.19)    |
| >10.0                | 7347    | 31   | 42.2  | 2.02 (1.36-3.02)    | 1.84 (1.21-2.81)    | 1.51 (0.93-2.47)    |
| <i>P</i> -trend      |         |      |       | <.001               | <.001               | 0.001               |
| <b>Premenopause</b>  |         |      |       |                     |                     |                     |
| ≤1.00                | 141 286 | 96   | 6.8   |                     |                     |                     |
| 1.01-2.00            | 20 500  | 20   | 9.8   | 1.52 (0.92-2.52)    | 1.49 (0.89-2.50)    | 1.57 (0.90-2.73)    |
| 2.01-3.00            | 5835    | 6    | 10.3  | 1.76 (0.77-4.06)    | 1.83 (0.79-4.22)    | 1.42 (0.52-3.93)    |
| 3.01-10.0            | 6886    | 6    | 8.7   | 1.51 (0.66-3.50)    | 1.31 (0.53-3.25)    | 1.21 (0.44-3.36)    |
| >10.0                | 1759    | 4    | 22.7  | 2.57 (0.81-8.14)    | 2.63 (0.83-8.37)    | 2.09 (0.51-8.58)    |
| <i>P</i> -trend      |         |      |       | 0.020               | 0.036               | 0.150               |
| <b>Postmenopause</b> |         |      |       |                     |                     |                     |
| ≤1.00                | 192 164 | 366  | 19.0  |                     |                     |                     |
| 1.01-2.00            | 52 897  | 145  | 27.4  | 1.26 (1.03-1.55)    | 1.25 (1.02-1.54)    | 1.18 (0.95-1.48)    |
| 2.01-3.00            | 16 943  | 44   | 26.0  | 1.11 (0.80-1.56)    | 1.12 (0.80-1.57)    | 1.19 (0.83-1.68)    |
| 3.01-10.0            | 19 687  | 67   | 34.0  | 1.49 (1.13-1.97)    | 1.47 (1.10-1.95)    | 1.52 (1.13-2.05)    |
| >10.0                | 4828    | 27   | 55.9  | 2.09 (1.37-3.21)    | 1.88 (1.19-2.96)    | 1.56 (0.92-2.63)    |
| <i>P</i> -trend      |         |      |       | <0.001              | 0.001               | 0.003               |

PY: Person-year, E: Number of death, MR: Mortality rate (10,000 person year)

1  
2  
3  
4  
5  
6  
7  
8  
9  
10  
11  
12  
13  
14  
15  
16  
17  
18  
19  
20  
21  
22  
23  
24  
25  
26  
27  
28  
29  
30  
31  
32  
33  
34  
35  
36  
37  
38  
39  
40  
41  
42  
43  
44  
45  
46  
47  
48  
49  
50  
51  
52  
53  
54  
55  
56  
57  
58  
59  
60

aHR: Adjusted for age, gender, education, job, marital status, BMI, non-communicable disease history, smoking, alcohol consumption and exercise

HR<sub>1year</sub>: aHR after exclude subjects who died within 1 yr f/u time

HR<sub>2year</sub>: aHR after exclude subjects who died within 2 yr f/u time

For peer review only

**Supplement 2.** The association between serum *hsCRP* level and all-cause mortality by gender and non-communicable disease history (NCD<sub>history</sub>) at recruitment

|                 | Healthy subjects at recruitment |       |       |                     |                     | Subjects with NCD <sub>history</sub> at recruitment |       |       |                     |                     |
|-----------------|---------------------------------|-------|-------|---------------------|---------------------|-----------------------------------------------------|-------|-------|---------------------|---------------------|
|                 | E                               | MR    | aHR   | HR <sub>1year</sub> | HR <sub>2year</sub> | E                                                   | MR    | aHR   | HR <sub>1year</sub> | HR <sub>2year</sub> |
| All             |                                 |       |       |                     |                     |                                                     |       |       |                     |                     |
| ≤ 1.00          | 517                             | 15.1  | Ref   | Ref                 | Ref                 | 636                                                 | 32.3  | Ref   | Ref                 | Ref                 |
| 1.01-2.00       | 145                             | 22.9  | 1.20  | 1.19                | 1.16                | 326                                                 | 45.1  | 1.20  | 1.19                | 1.16                |
| 2.01-3.00       | 53                              | 29.3  | 1.38  | 1.37                | 1.32                | 136                                                 | 56.6  | 1.51  | 1.46                | 1.41                |
| 3.01-10.0       | 102                             | 46.8  | 2.22  | 2.15                | 2.15                | 191                                                 | 66.3  | 1.62  | 1.60                | 1.58                |
| >10.0           | 40                              | 61.3  | 2.38  | 2.23                | 2.27                | 83                                                  | 118.9 | 2.74  | 2.54                | 2.29                |
| <i>P</i> -trend |                                 |       | <.001 | <.001               | <.001               |                                                     |       | <.001 | <.001               | <.001               |
| Men             |                                 |       |       |                     |                     |                                                     |       |       |                     |                     |
| ≤ 1.00          | 270                             | 29.5  | Ref   | Ref                 | Ref                 | 368                                                 | 51.4  | Ref   | Ref                 | Ref                 |
| 1.01-2.00       | 89                              | 35.8  | 1.11  | 1.11                | 1.13                | 204                                                 | 70.0  | 1.40  | 1.41                | 1.33                |
| 2.01-3.00       | 33                              | 46.3  | 1.22  | 1.17                | 1.15                | 98                                                  | 99.0  | 1.82  | 1.73                | 1.61                |
| 3.01-10.0       | 70                              | 76.8  | 2.14  | 2.08                | 2.03                | 141                                                 | 118.1 | 1.92  | 1.90                | 1.83                |
| >10.0           | 31                              | 110.0 | 2.60  | 2.49                | 2.73                | 61                                                  | 183.1 | 3.05  | 2.83                | 2.58                |
| <i>P</i> -trend |                                 |       | <.001 | <.001               | <.001               |                                                     |       | <.001 | <.001               | <.001               |
| Women           |                                 |       |       |                     |                     |                                                     |       |       |                     |                     |
| ≤ 1.00          | 247                             | 9.8   | Ref   | Ref                 | Ref                 | 268                                                 | 21.4  | Ref   | Ref                 | Ref                 |
| 1.01-2.00       | 56                              | 14.6  | 1.35  | 1.32                | 1.20                | 122                                                 | 28.3  | 1.19  | 1.20                | 1.19                |
| 2.01-3.00       | 20                              | 18.2  | 1.61  | 1.66                | 1.60                | 38                                                  | 26.9  | 1.06  | 1.06                | 1.11                |
| 3.01-10.0       | 32                              | 25.2  | 2.31  | 2.23                | 2.37                | 50                                                  | 29.7  | 1.16  | 1.14                | 1.17                |
| >10.0           | 9                               | 24.3  | 1.69  | 1.49                | 1.12                | 22                                                  | 60.3  | 2.15  | 1.99                | 1.68                |
| <i>P</i> -trend |                                 |       | <.001 | <.001               | 0.001               |                                                     |       | 0.018 | 0.043               | 0.084               |

E: Number of death, MR: Mortality rate (10 000 person year)

aHR: Adjusted for age, gender, education, job, marital status, BMI, non-communicable disease history, smoking, alcohol consumption and exercise

HR<sub>1year</sub>: aHR after exclude subjects who died within 1 yr f/u time

HR<sub>2year</sub>: aHR after exclude subjects who died within 2 yr f/u time



**STROBE 2007 (v4) checklist of items to be included in reports of observational studies in epidemiology\***  
**Checklist for cohort, case-control, and cross-sectional studies (combined)**

| Section/Topic             | Item # | Recommendation                                                                                                                                                                                                                                                                                                                                                                                                                                                         | Reported on page # |
|---------------------------|--------|------------------------------------------------------------------------------------------------------------------------------------------------------------------------------------------------------------------------------------------------------------------------------------------------------------------------------------------------------------------------------------------------------------------------------------------------------------------------|--------------------|
| <b>Title and abstract</b> | 1      | (a) Indicate the study’s design with a commonly used term in the title or the abstract                                                                                                                                                                                                                                                                                                                                                                                 | 1                  |
|                           |        | (b) Provide in the abstract an informative and balanced summary of what was done and what was found                                                                                                                                                                                                                                                                                                                                                                    | 1-2                |
| Introduction              |        |                                                                                                                                                                                                                                                                                                                                                                                                                                                                        |                    |
| Background/rationale      | 2      | Explain the scientific background and rationale for the investigation being reported                                                                                                                                                                                                                                                                                                                                                                                   | 3                  |
| Objectives                | 3      | State specific objectives, including any pre-specified hypotheses                                                                                                                                                                                                                                                                                                                                                                                                      | 3                  |
| Methods                   |        |                                                                                                                                                                                                                                                                                                                                                                                                                                                                        |                    |
| Study design              | 4      | Present key elements of study design early in the paper                                                                                                                                                                                                                                                                                                                                                                                                                | 4                  |
| Setting                   | 5      | Describe the setting, locations, and relevant dates, including periods of recruitment, exposure, follow-up, and data collection                                                                                                                                                                                                                                                                                                                                        | 4-5                |
| Participants              | 6      | (a) <i>Cohort study</i> —Give the eligibility criteria, and the sources and methods of selection of participants. Describe methods of follow-up<br><i>Case-control study</i> —Give the eligibility criteria, and the sources and methods of case ascertainment and control selection. Give the rationale for the choice of cases and controls<br><i>Cross-sectional study</i> —Give the eligibility criteria, and the sources and methods of selection of participants | 4                  |
|                           |        | (b) <i>Cohort study</i> —For matched studies, give matching criteria and number of exposed and unexposed<br><i>Case-control study</i> —For matched studies, give matching criteria and the number of controls per case                                                                                                                                                                                                                                                 | Not Applicable     |
| Variables                 | 7      | Clearly define all outcomes, exposures, predictors, potential confounders, and effect modifiers. Give diagnostic criteria, if applicable                                                                                                                                                                                                                                                                                                                               | 5                  |
| Data sources/ measurement | 8*     | For each variable of interest, give sources of data and details of methods of assessment (measurement). Describe comparability of assessment methods if there is more than one group                                                                                                                                                                                                                                                                                   | 5                  |
| Bias                      | 9      | Describe any efforts to address potential sources of bias                                                                                                                                                                                                                                                                                                                                                                                                              | 6                  |
| Study size                | 10     | Explain how the study size was arrived at                                                                                                                                                                                                                                                                                                                                                                                                                              | 4                  |
| Quantitative variables    | 11     | Explain how quantitative variables were handled in the analyses. If applicable, describe which groupings were chosen and why                                                                                                                                                                                                                                                                                                                                           | 5-6                |
| Statistical methods       | 12     | (a) Describe all statistical methods, including those used to control for confounding                                                                                                                                                                                                                                                                                                                                                                                  | 5-6                |
|                           |        | (b) Describe any methods used to examine subgroups and interactions                                                                                                                                                                                                                                                                                                                                                                                                    | 5-6                |
|                           |        | (c) Explain how missing data were addressed                                                                                                                                                                                                                                                                                                                                                                                                                            | 4                  |
|                           |        | (d) <i>Cohort study</i> —If applicable, explain how loss to follow-up was addressed<br><i>Case-control study</i> —If applicable, explain how matching of cases and controls was addressed                                                                                                                                                                                                                                                                              | 4                  |

1  
2  
3  
4  
5  
6  
7  
8  
9  
10  
11  
12  
13  
14  
15  
16  
17  
18  
19  
20  
21  
22  
23  
24  
25  
26  
27  
28  
29  
30  
31  
32  
33  
34  
35  
36  
37  
38  
39  
40  
41  
42  
43  
44  
45  
46

|                          |     |                                                                                                                                                                                                              |                |
|--------------------------|-----|--------------------------------------------------------------------------------------------------------------------------------------------------------------------------------------------------------------|----------------|
|                          |     | <i>Cross-sectional study</i> —If applicable, describe analytical methods taking account of sampling strategy                                                                                                 |                |
|                          |     | (e) Describe any sensitivity analyses                                                                                                                                                                        | 6              |
| <b>Results</b>           |     |                                                                                                                                                                                                              |                |
| Participants             | 13* | (a) Report numbers of individuals at each stage of study—eg numbers potentially eligible, examined for eligibility, confirmed eligible, included in the study, completing follow-up, and analysed            | 4              |
|                          |     | (b) Give reasons for non-participation at each stage                                                                                                                                                         | 4              |
|                          |     | (c) Consider use of a flow diagram                                                                                                                                                                           | 4              |
| Descriptive data         | 14* | (a) Give characteristics of study participants (eg demographic, clinical, social) and information on exposures and potential confounders                                                                     | 6-7            |
|                          |     | (b) Indicate number of participants with missing data for each variable of interest                                                                                                                          | 4              |
|                          |     | (c) <i>Cohort study</i> —Summarise follow-up time (eg, average and total amount)                                                                                                                             | 6              |
| Outcome data             | 15* | <i>Cohort study</i> —Report numbers of outcome events or summary measures over time                                                                                                                          | 6-10           |
|                          |     | <i>Case-control study</i> —Report numbers in each exposure category, or summary measures of exposure                                                                                                         | Not Applicable |
|                          |     | <i>Cross-sectional study</i> —Report numbers of outcome events or summary measures                                                                                                                           | Not Applicable |
| Main results             | 16  | (a) Give unadjusted estimates and, if applicable, confounder-adjusted estimates and their precision (eg, 95% confidence interval). Make clear which confounders were adjusted for and why they were included | 6-10           |
|                          |     | (b) Report category boundaries when continuous variables were categorized                                                                                                                                    | 5              |
|                          |     | (c) If relevant, consider translating estimates of relative risk into absolute risk for a meaningful time period                                                                                             | Not Applicable |
| Other analyses           | 17  | Report other analyses done—eg analyses of subgroups and interactions, and sensitivity analyses                                                                                                               | 8              |
| <b>Discussion</b>        |     |                                                                                                                                                                                                              |                |
| Key results              | 18  | Summarise key results with reference to study objectives                                                                                                                                                     | 11             |
| Limitations              | 19  | Discuss limitations of the study, taking into account sources of potential bias or imprecision. Discuss both direction and magnitude of any potential bias                                                   | 12-13          |
| Interpretation           | 20  | Give a cautious overall interpretation of results considering objectives, limitations, multiplicity of analyses, results from similar studies, and other relevant evidence                                   | 11-13          |
| Generalisability         | 21  | Discuss the generalisability (external validity) of the study results                                                                                                                                        | 11-12          |
| <b>Other information</b> |     |                                                                                                                                                                                                              |                |
| Funding                  | 22  | Give the source of funding and the role of the funders for the present study and, if applicable, for the original study on which the present article is based                                                | 14             |

\*Give information separately for cases and controls in case-control studies and, if applicable, for exposed and unexposed groups in cohort and cross-sectional studies.

**Note:** An Explanation and Elaboration article discusses each checklist item and gives methodological background and published examples of transparent reporting. The STROBE checklist is best used in conjunction with this article (freely available on the Web sites of PLoS Medicine at <http://www.plosmedicine.org/>, Annals of Internal Medicine at <http://www.annals.org/>, and Epidemiology at <http://www.epidem.com/>). Information on the STROBE Initiative is available at [www.strobe-statement.org](http://www.strobe-statement.org).

# BMJ Open

## The association of serum high sensitivity C-reactive protein with the risk of mortality in an Asian population: the Health Examinees cohort

|                                 |                                                                                                                                                                                                                                                                                                                                                                                                                                                                                                   |
|---------------------------------|---------------------------------------------------------------------------------------------------------------------------------------------------------------------------------------------------------------------------------------------------------------------------------------------------------------------------------------------------------------------------------------------------------------------------------------------------------------------------------------------------|
| Journal:                        | <i>BMJ Open</i>                                                                                                                                                                                                                                                                                                                                                                                                                                                                                   |
| Manuscript ID                   | bmjopen-2021-052630.R2                                                                                                                                                                                                                                                                                                                                                                                                                                                                            |
| Article Type:                   | Original research                                                                                                                                                                                                                                                                                                                                                                                                                                                                                 |
| Date Submitted by the Author:   | 28-Mar-2022                                                                                                                                                                                                                                                                                                                                                                                                                                                                                       |
| Complete List of Authors:       | Lee, Sang-Ah; Kangwon National University School of Medicine, Preventive Medicine; Vanderbilt University Medical Center<br>Kwon, Sung Ok; Kangwon National University School of Medicine, Preventive Medicine<br>Park, Hyerim; Kangwon National University School of Medicine, Preventive Medicine<br>Shu, Xiao-Ou ; Vanderbilt University Medical Center<br>Lee, Jong-Koo; JW LEE Center for Global Medicine<br>Kang, Daehee; Seoul National University College of Medicine, Preventive Medicine |
| <b>Primary Subject Heading</b>: | Epidemiology                                                                                                                                                                                                                                                                                                                                                                                                                                                                                      |
| Secondary Subject Heading:      | Epidemiology, Cardiovascular medicine                                                                                                                                                                                                                                                                                                                                                                                                                                                             |
| Keywords:                       | PREVENTIVE MEDICINE, EPIDEMIOLOGY, Cardiac Epidemiology < CARDIOLOGY                                                                                                                                                                                                                                                                                                                                                                                                                              |
|                                 |                                                                                                                                                                                                                                                                                                                                                                                                                                                                                                   |

SCHOLARONE™  
Manuscripts



I, the Submitting Author has the right to grant and does grant on behalf of all authors of the Work (as defined in the below author licence), an exclusive licence and/or a non-exclusive licence for contributions from authors who are: i) UK Crown employees; ii) where BMJ has agreed a CC-BY licence shall apply, and/or iii) in accordance with the terms applicable for US Federal Government officers or employees acting as part of their official duties; on a worldwide, perpetual, irrevocable, royalty-free basis to BMJ Publishing Group Ltd ("BMJ") its licensees and where the relevant Journal is co-owned by BMJ to the co-owners of the Journal, to publish the Work in this journal and any other BMJ products and to exploit all rights, as set out in our [licence](#).

The Submitting Author accepts and understands that any supply made under these terms is made by BMJ to the Submitting Author unless you are acting as an employee on behalf of your employer or a postgraduate student of an affiliated institution which is paying any applicable article publishing charge ("APC") for Open Access articles. Where the Submitting Author wishes to make the Work available on an Open Access basis (and intends to pay the relevant APC), the terms of reuse of such Open Access shall be governed by a Creative Commons licence – details of these licences and which [Creative Commons](#) licence will apply to this Work are set out in our licence referred to above.

Other than as permitted in any relevant BMJ Author's Self Archiving Policies, I confirm this Work has not been accepted for publication elsewhere, is not being considered for publication elsewhere and does not duplicate material already published. I confirm all authors consent to publication of this Work and authorise the granting of this licence.

196 **The association of serum high sensitivity C-reactive protein with the risk of mortality in**  
197 **an Asian population: the Health Examinees cohort**

200 Sang-Ah Lee<sup>1,2\*</sup>, Sung Ok Kwon<sup>1</sup>, Hyerim Park<sup>1</sup>, Xiao-Ou Shu<sup>2</sup>, Jong-Koo Lee<sup>3</sup>, Daehee Kang<sup>4</sup>

203 <sup>1</sup>Department of Preventive Medicine, School of Medicine, Kangwon National University, Chuncheon, Republic  
204 of Korea.

205 <sup>2</sup>Division of Epidemiology, Vanderbilt Epidemiology Center, Vanderbilt University Medical Center, Nashville,  
206 TN, USA.

207 <sup>3</sup>JW Lee Center for Global Medicine, College of Medicine, Seoul National University, Seoul, Republic of Korea.

208 <sup>4</sup>Department of Preventive Medicine, College of Medicine, Seoul National University, Seoul, Republic of Korea.

211 **ABSTRACT**

212 **Objectives** This study aimed to examine the association of *hsCRP* with mortality risk and the attenuated effect  
213 of non-communicable disease history (NCD<sub>history</sub>) on the association.

214 **Design** Prospective cohort study.

215 **Setting** the Health Examinees (HEXA) cohort.

216 **Participants** A total of 41 070 men and 81 011 women aged  $\geq 40$  years were involved (follow-up: 6.8 years).

217 **Outcome measures** The data and cause of death occurring until December 31, 2015, were confirmed by death  
218 statistics from the National Statistical Office. We conducted the advanced analysis after stratification by  
219 NCD<sub>history</sub> and the sensitivity analysis after excluding death before 1 or 2 years from recruitment. Cox  
220 proportional hazard and restricted cubic spline models were used to assess the association.

221 **Results** The association between serum *hsCRP* and the risk of all-cause mortality was observed with strong  
222 linearity in both genders, which was not influenced by NCD<sub>history</sub>. Otherwise, the association of serum *hsCRP*  
223 with cancer-mortality risk was not observed in women with NCD<sub>history</sub>, but the association with the risk of  
224 cardiovascular disease (CVD) mortality was predominantly observed in men with NCD<sub>history</sub>.

225 **Conclusions** This study suggested the dose-response association of *hsCRP* with mortality risk, including  
226 cancer and CVD mortality, in Korean with low serum *hsCRP*, although the association with cancer and CVD-  
227 mortality risk could be influenced by gender and NCD<sub>history</sub>.

230 **Strengths and limitations of this study**

- 231 • This is the large population-based prospective study.
- 232 • We examined the effect of very high *hsCRP* concentration on mortality risk.
- 233 • The *hsCRP* level of present study was measured within 18 hours in a single institution to minimize error/bias.

1  
2  
3  
4 234 • Due to random fluctuations of *hsCRP*, using the single measurement of *hsCRP* at baseline could reflect the  
5  
6 235 inaccurate status of blood *hsCRP* levels in the study participants and increase the instability of *hsCRP*.  
7  
8 236 • This study lacked information on medication use at recruitment and during the follow-up period, and  
9  
10 237 information on hormone-replacement therapy (HRT) among women.  
11  
12 238  
13 239

14 240 \*Correspondence to: Sang-Ah Lee, Ph.D.

15 241 Department of Preventive Medicine, School of Medicine, Kangwon National University,

16 242 Chuncheon, Gangwon, Republic of Korea.

17 243 Tel: +82 33 250 8871

18 244 E-mail: [sangahlee@kangwon.ac.kr](mailto:sangahlee@kangwon.ac.kr)  
19 245  
20  
21  
22  
23  
24  
25  
26  
27  
28  
29  
30  
31  
32  
33  
34  
35  
36  
37  
38  
39  
40  
41  
42  
43  
44  
45  
46  
47  
48  
49  
50  
51  
52  
53  
54  
55  
56  
57  
58  
59  
60

## 266 INTRODUCTION

267 High sensitivity C-reactive protein (*hsCRP*) is an acute-phase response protein synthesized by the liver and  
268 the most sensitive and dynamic marker of inflammation[1]. Since *hsCRP* has been reported as a candidate  
269 marker for generalized atherosclerosis and cardiovascular disease (CVD)[2], many studies[3-7] have  
270 investigated the role of *hsCRP* levels as a predictor of mortality risk. A recent meta-analysis[8] reported the  
271 predictable role of serum *hsCRP* on all-cause and CVD mortality in the general population. Nevertheless, it is  
272 controversial whether the predictable role of *hsCRP* could be applied to the risk of mortality in Asians, whose  
273 *hsCRP* levels are lower than those in individuals in Western countries.

274 Serum *hsCRP* represents a low-grade inflammation state that is generally involved in the process of aging[9].  
275 Several large cohorts, including Study of Women's Health Across the Nation (SWAN)[10], the Women's  
276 Health Study[11] and the Dallas Heart Study[12], reported significant differences in *hsCRP* levels by race and  
277 gender. In two studies of multiethnic populations residing in the USA[10, 13], the median *hsCRP* level in East  
278 Asians was less than half the concentration in Caucasians. Even among East Asian populations, the geometric  
279 mean of *hsCRP* levels varied depending on ethnic background[14]. In addition, a meta-analysis[11] reported  
280 the *hsCRP* levels among women of various ethnic groups living in the United States (from the Women's Health  
281 Study) on the association between *hsCRP* and the mortality risk; the association was observed in only men  
282 supported by the results from two cohort studies[15, 16] reported in Korea. On the other hand, the increased  
283 *hsCRP* may be influenced by comorbidity itself because inflammation has emerged as an important factor in the  
284 progression of non-communicable diseases (NCDs), including CVD[17], cancer[18], chronic obstructive  
285 pulmonary disease (COPD)[19], type 2 diabetes[20] and fractures[21], which contribute to increased morbidity  
286 and mortality.

287 This study aimed to examine the association of serum *hsCRP* with the risk of mortality in Koreans with low  
288 serum *hsCRP* and to evaluate the attenuated effect of non-communicable disease history ( $NCD_{history}$ ) on the  
289 association.

290

291

292

293

294

## 295 **METHODS**

### 296 **Study population**

297 Details on the main objectives, rationale, study design and baseline characteristics of the Health Examinees  
298 (HEXA) study have been published elsewhere[22]. Considering the homogeneity and comparability of  
299 participants, we created a qualified dataset called HEXA-G (Health Examinees-Gem) from previously published  
300 HEXA studies[23]. In the new HEXA-G data, a total of 141 968 participants remained after the exclusion of  
301 withdrawers ( $n=12$ ). In addition, 19 887 were excluded due to missing information ( $n=19 876$ ) or small sample  
302 size ( $n=11$ ) on any *hsCRP* components at the baseline survey. Ultimately, 122 081 subjects, including 41 070  
303 men and 81 011 women, remained in the final analysis (Fig. 1). All study participants provided informed  
304 consent prior to entering the study. The Institutional Review Board of the Seoul National University Hospital,  
305 Seoul, Korea, approved it for statistical analysis (IRB No. E-1503-103-657).

### 307 **Laboratory measurements**

308 After at least 10 hours of overnight fasting, blood samples were obtained in the morning. Bio-specimens  
309 included fasting blood samples that were collected in a serum separator tube and two ethylenediaminetetraacetic  
310 acid (EDTA) tubes. All samples were then transported to the National Biobank of Korea and stored for future  
311 research purposes within 18 hours. *hsCRP* was measured using a turbidimetric immunoassay (ADVIA 1650 and  
312 ADVIA 1800; Siemens Healthineers).

### 314 **Follow-up and ascertainment of mortality**

315 All-cause mortality was confirmed by death statistics from the National Statistical Office, which provided the  
316 data and causes of all deaths occurring through December 31, 2015. We added the mortality data from Statistics  
317 Korea to our dataset using each participant's unique identifier. Information on death and causes of death was  
318 obtained from a record link with the national death certificate files in Korea. The main outcome of interest was  
319 all-cause mortality (defined as death from any cause), including cancers and CVD mortality. The cause of death  
320 was classified according to the International Classification of Diseases, 10th revision (ICD-10). Deaths were  
321 coded as C00-C97 for cancer and I00-I99 for CVD.

322



### 323 **Baseline variables**

324 Trained interviewers collected information on demographic, socioeconomic and lifestyle factors.  
325 Anthropometric measurements were obtained using standardized methods. Body mass index (BMI) was  
326 calculated, and all participants were defined into four classes based on the World Health Organization  
327 classification of BMI for Asian adults[24]: underweight (BMI <18.5 kg/m<sup>2</sup>), normal (18.5 ≤ BMI <23.0 kg/m<sup>2</sup>),  
328 overweight (23.0 ≤ BMI <25.0 kg/m<sup>2</sup>), obesity (25.0 ≤ BMI <29.9 kg/m<sup>2</sup>), and severe obesity (BMI ≥30.0 kg/m<sup>2</sup>).  
329 The current study defined metabolic syndrome using the National Cholesterol Education Program Adult  
330 Treatment Panel III (NCEP-ATP III)[25], modified for the Asian guideline for waist circumference (WC ≥90 and  
331 ≥80 cm for men and women, respectively). Nonsmokers were defined as those who had smoked less than 400  
332 cigarettes over the course of their lifetime. Participants who had smoked were categorized into two groups:  
333 noncurrent (never/former) and current smoker. Noncurrent drinkers were defined as those who had never  
334 consumed an alcoholic drink over the course of their lifetime or those who had not consumed alcohol at  
335 recruitment, while current drinkers were defined as those who persisted in consuming alcohol. Regular exercise  
336 was classified into two groups (yes/no) as follows: “Do you currently engage in regular exercise strenuous enough  
337 to cause you to break into a sweat at least once per week?” Furthermore, considering the attenuated effect of the  
338 NCD<sub>history</sub> on the association between serum *hsCRP* and the risk of mortality, we performed advanced analysis  
339 after stratification by NCD<sub>history</sub>. We considered six main non-communicable diseases (hypertension, diabetes,  
340 hyperlipidemia, cancer, cardiovascular and cerebrovascular diseases, and respiratory disease) to classify healthy  
341 subjects vs. subjects with NCD<sub>history</sub>.

342

### 343 **Statistical analysis**

344 For the categorical analysis, we created nine categories based on the distribution of *hsCRP* levels in our  
345 population: ≤1.00 (reference group), 1.01-1.50, 1.51-2.00, 2.01-2.50, 2.51-3.00, 3.01-4.00, 4.01-6.00, 6.01-10.0,  
346 and >10.0 mg/L. For the advanced analysis after stratification by the NCD<sub>history</sub>, the *hsCRP* levels were  
347 categorized as ≤1.00, 1.01-2.00, 2.01-3.00, 3.01-10.0, and >10.0 mg/L because of the reduced sample size in  
348 each subgroup. The concentrations of *hsCRP* were log-transformed for analyses because of the skewed  
349 distribution.

350 We calculated a follow-up time for each subject starting from the date of interview until the date of death or  
351 December 31, 2015, whichever came first. Using age as the time scale, subjects enter the risk set at the age at  
352 which they completed the baseline questionnaire and exit at their event/censoring age. The associations of

1  
2  
3  
4 353 *hsCRP* and all-cause mortality, as well as cancer and CVD mortality, were analyzed by Cox proportional hazard  
5  
6 354 models (aHR) and included adjustment for age, gender, demographic factors (education, marital status, job, BMI  
7  
8 355 and NCD<sub>history</sub>), and lifestyle factors (smoking, alcohol consumption and exercise). We used Wald tests to test  
9  
10 356 for heterogeneity of risk between serum *hsCRP* level groups. The proportional hazards assumption was assessed  
11  
12 357 on the basis of Schoenfeld residuals, and was not violated for the variables of interest in the adjusted model for  
13  
14 358 either cancer-mortality or cardiovascular disease mortality ( $P>0.05$  for all categories). In addition, we conducted  
15  
16 359 a sensitivity analysis to avoid latent period bias after excluding death before 1 year (aHR<sub>1year</sub>) or 2 years  
17  
18 360 (aHR<sub>2year</sub>) since recruitment. Based on the Cox proportional hazard models, we made Kaplan-Meier curves and  
19  
20 361 log-rank analysis after adjustment for age, gender, demographic factors (education, marital status, job, BMI and  
21  
22 362 NCD<sub>history</sub>), and lifestyle factors (smoking, alcohol consumption and exercise). We employed restricted cubic  
23  
24 363 splines (RCSs) to evaluate the possibility of complex (i.e., nonlinear) hazard functions[26] using continuous  
25  
26 364 values of *hsCRP* (aHR<sub>continuous</sub>). We selected five *hsCRP* concentration values as knots based on *hsCRP* concen-  
27  
28 365 tration percentiles, tested the linear and nonlinear associations between knots using a cubic function, and  
29  
30 366 presented the integrated graph smoothly. All statistical analyses were performed using SAS version 9.3 (SAS  
31  
32 367 Institute Inc., Cary, NC, USA) and RCS analysis was carried out using the SAS LGTPHCURV9 macro. Two-  
33  
34 368 sided *p*-values  $<0.05$  were defined as indicating statistical significance.

35 369

### 370 **Patient and public involvement**

38  
39 371 No patients and public were involved in the design, conducting, reporting, and dissemination plans of the present  
40  
41 372 study.

42 373

43 374

44 375

45 376

46 377

47 378

48 379

49 380

50 381

51 382

**RESULTS**

The association of demographic and lifestyle factors with the risk of all-cause mortality is presented in Table 1. During the follow-up period (average 6.8 years), 1 365 men and 864 women died. The median levels of *hsCRP* were 0.77 and 0.59 mg/L for men and women, respectively. The risk of all-cause mortality was inversely associated with female gender (aHR=0.38), high educated (aHR=0.65), overweight (aHR=0.81) or obesity (aHR=0.83), current alcohol consumption (aHR=0.81) and regular exercise (aHR=0.83), but was positively associated with single marital status (aHR=1.23), NCD<sub>history</sub> (aHR=1.57), underweight (aHR=2.05) and current smoking (aHR=1.97).

412 **Table 1.** Baseline characteristics of participants by all-cause mortality.

|                                      | All<br>(n=122 081) | Death<br>(n=2229) | All-cause mortality |                     |
|--------------------------------------|--------------------|-------------------|---------------------|---------------------|
|                                      |                    |                   | Age,gender adjusted | adj HR <sup>a</sup> |
| Age                                  | 53.1 ± 8.3         | 59.7 ± 8.8        |                     |                     |
| Female                               | 66.4               | 38.8              | 0.40 (0.36-0.43)    | 0.38 (0.33-0.44)    |
| Education (≥10 year, %)              | 68.2               | 55.4              | 0.67 (0.60-0.75)    | 0.65 (0.56-0.75)    |
| Blue-colored worker <sup>b</sup> (%) | 32.3               | 33.8              | 1.46 (1.26-1.68)    | 1.16 (0.99-1.35)    |
| Marital status (single, %)           | 11.0               | 13.3              | 1.35 (1.19-1.54)    | 1.23 (1.07-1.40)    |
| NCD <sub>history</sub> (yes, %)      | 32.4               | 53.6              | 1.51 (1.39-1.65)    | 1.57 (1.42-1.72)    |
| Hypertension                         | 18.9               | 31.5              | 1.18 (1.08-1.30)    | 1.22 (1.11-1.35)    |
| Diabete                              | 6.5                | 17.1              | 1.81 (1.62-2.03)    | 1.77 (1.57-2.00)    |
| Hyperlipidemia                       | 9.2                | 7.6               | 0.73 (0.62-0.86)    | 0.78 (0.66-0.92)    |
| Cancer                               | 3.2                | 8.8               | 2.69 (2.31-3.12)    | 2.66 (2.27-3.11)    |
| Cerebral & cardiovascular disease    | 3.7                | 10.2              | 1.50 (1.30-1.73)    | 1.43 (1.23-1.66)    |
| Respiratory disease                  | 2.4                | 4.3               | 1.37 (1.12-1.68)    | 1.32 (1.06-1.64)    |
| Body mass index (%)                  |                    |                   |                     |                     |
| <18.5                                | 1.8                | 3.7               | 2.14 (1.69-2.69)    | 2.05 (1.61-2.62)    |
| 18.5-22.9                            | 38.1               | 34.9              | 1.00 (ref.)         | 1.00 (ref.)         |
| 23.0-24.9                            | 27.8               | 26.0              | 0.82 (0.73-0.91)    | 0.81 (0.72-0.91)    |
| 25.0-29.9                            | 29.5               | 32.5              | 0.90 (0.81-1.00)    | 0.83 (0.74-0.93)    |
| ≥ 30.0                               | 2.8                | 2.9               | 1.08 (0.83-1.39)    | 0.81 (0.61-1.08)    |
| <i>P</i> -trend                      |                    |                   | 0.0118              | <.0001              |
| Metabolic syndrome (yes, %)          | 22.0               | 28.4              | 1.13 (1.03-1.24)    | 1.07 (0.96-1.19)    |
| Current smoker (%)                   | 11.7               | 22.7              | 2.04 (1.79-2.33)    | 1.97 (1.71-2.27)    |
| Current drinker (%)                  | 44.0               | 43.8              | 0.86 (0.77-0.95)    | 0.81 (0.73-0.91)    |
| Regular exercise (yes, %)            | 53.4               | 49.1              | 0.76 (0.70-0.83)    | 0.83 (0.76-0.91)    |

413 NCD<sub>history</sub>: Non-communicable disease history414 <sup>a</sup> Adjusted for age, gender, education, job, marital status, BMI and non-communicable disease history415 <sup>b</sup> Compared to white-colored worker

416

417

418

419

420

421

422

423

424

1  
2  
3  
4 425 The risk of all-cause mortality was inclined with a dose-dependent pattern as increased serum *hsCRP* level  
5  
6 426 ( $P_{trend}<0.001$ , Supplement 1), regardless of gender ( $P_{trend}<0.001$  in both genders), even in the sensitivity analysis  
7  
8 427 ( $P_{trend}<0.001$  for  $aHR_{1year}$  in both genders). The increased risk of female mortality with increased *hsCRP* levels  
9  
10 428 was observed in both premenopausal ( $P_{trend}=0.020$ ) and postmenopausal women ( $P_{trend}<0.001$ ), although the  
11  
12 429 statistical significance in premenopausal women disappeared after sensitivity analysis ( $P_{trend}=0.150$  for  $aHR_{2year}$ ,  
13  
14 430 Supplement 1). The integrated graph, based on the restricted cubic spline analyses, indicated a strong and linear  
15  
16 431 association of serum *hsCRP* level with all-cause mortality in both genders ( $aHR_{continuous}=1.019$  and  $1.013$  in men  
17  
18 432 and women, respectively, Fig. 2 (a)).

19 433 The dose-response association between *hsCRP* level and the risk of all-cause mortality was not influenced by  
20  
21 434  $NCD_{history}$  (Supplement 2). After stratification by gender, however, the attenuated effect by  $NCD_{history}$  on the  
22  
23 435 association was observed only in women; the linearity of the relationship was observed in healthy women  
24  
25 436 ( $P_{trend}=0.001$  for  $aHR_{2year}$ ) but disappeared in women with  $NCD_{history}$ , particularly after sensitivity analysis with  
26  
27 437 the exclusion of a 2-year follow-up time ( $P_{trend}=0.084$  for  $aHR_{2year}$ ). Based on the restricted cubic spline  
28  
29 438 analyses, otherwise, the pattern of increase in the association was different depending on the  $NCD_{history}$  (Fig. 2  
30  
31 439 (b), (c)). In the healthy subjects, the risk of all-cause mortality was increased with a gradual slope (strength)  
32  
33 440 until  $3.0\text{ mg/L}$  *hsCRP*, with a very steep slope until  $4.5\text{ mg/L}$  and finally with a reduced and flattened slope after  
34  
35 441  $4.5\text{ mg/L}$  (Fig. 2 (b)). On the other hand, the slope of the association fluctuated as the *hsCRP* level increased in  
36  
37 442 the subjects with  $NCD_{history}$ ; the slope increased up to  $3.0\text{ mg/L}$  *hsCRP* but decreased until  $4.5\text{ mg/L}$  and rapidly  
38  
39 443 increased after  $4.5\text{ mg/L}$  (Fig. 2 (c)).

40 444 The association of serum *hsCRP* with the risk of cancer-mortality was not influenced by  $NCD_{history}$   
41  
42 445 ( $P_{trend}<0.001$  regardless of  $NCD_{history}$ ) (Table 2 and Fig. 3 (a-e)). Otherwise, after stratification by gender, the  
43  
44 446 association was not observed in women with  $NCD_{history}$  ( $P_{trend}=0.856$ ); however, the association was not  
45  
46 447 influenced by  $NCD_{history}$  in men ( $P_{trend}<0.001$  and  $0.002$  for  $aHR$  in both healthy and  $NCD_{history}$ ) (Table 2).  
47  
48 448 Although the risk of CVD mortality was linearly associated with increasing *hsCRP* levels, the association was  
49  
50 449 dominant in men ( $P_{trend}=0.002$ ) and in subjects with  $NCD_{history}$  ( $P_{trend}=0.001$ , Table 3) after stratified by gender  
51  
52 450 and  $NCD_{history}$ , respectively (Fig. 4 (a-e)). After stratification by gender and  $NCD_{history}$ , otherwise, the association  
53  
54 451 only appeared in individuals of both genders with  $NCD_{history}$  ( $P_{trend}=0.015$  and  $0.035$  in men and women with  
55  
56 452  $NCD_{history}$ , respectively); no association between *hsCRP* level and CVD mortality risk was found in either  
57  
58 453 healthy men or women.

**Table 2.** The association between serum *hs*CRP level and cancer-mortality by gender and non-communicable disease history (NCD<sub>history</sub>) at recruitment.

|                 | Cancer-mortality |      |       |                     |                     | Healthy subjects at recruitment |       |       |                     |                     | Subjects with NCD <sub>history</sub> at recruitment |      |       |                     |                     |
|-----------------|------------------|------|-------|---------------------|---------------------|---------------------------------|-------|-------|---------------------|---------------------|-----------------------------------------------------|------|-------|---------------------|---------------------|
|                 | E                | MR   | aHR   | HR <sub>1year</sub> | HR <sub>2year</sub> | E                               | MR    | aHR   | HR <sub>1year</sub> | HR <sub>2year</sub> | E                                                   | MR   | aHR   | HR <sub>1year</sub> | HR <sub>2year</sub> |
| <b>Total</b>    |                  |      |       |                     |                     |                                 |       |       |                     |                     |                                                     |      |       |                     |                     |
| ≤1.00           | 590              | 10.9 | Ref   | Ref                 | Ref                 | 270                             | 7.9   | Ref   | Ref                 | Ref                 | 320                                                 | 16.3 | Ref   | Ref                 | Ref                 |
| 1.01-2.00       | 232              | 17.1 | 1.25  | 1.23                | 1.17                | 85                              | 13.4  | 1.43  | 1.40                | 1.31                | 147                                                 | 20.3 | 1.19  | 1.13                | 1.09                |
| 2.01-3.00       | 86               | 20.4 | 1.32  | 1.24                | 1.19                | 29                              | 16.0  | 1.38  | 1.34                | 1.35                | 57                                                  | 23.7 | 1.35  | 1.18                | 1.10                |
| 3.01-10.0       | 149              | 29.4 | 1.83  | 1.76                | 1.72                | 54                              | 24.8  | 2.22  | 2.07                | 2.01                | 95                                                  | 33.0 | 1.75  | 1.59                | 1.55                |
| >10.0           | 66               | 48.9 | 2.69  | 2.28                | 1.96                | 20                              | 30.6  | 1.85  | 1.59                | 1.57                | 46                                                  | 65.9 | 3.25  | 2.64                | 2.16                |
| <i>P</i> -trend |                  |      | <.001 | <.001               | <.001               |                                 |       | <.001 | <.001               | <.001               |                                                     |      | <.001 | <.001               | <.001               |
| <b>Men</b>      |                  |      |       |                     |                     |                                 |       |       |                     |                     |                                                     |      |       |                     |                     |
| ≤1.00           | 302              | 18.5 | Ref   | Ref                 | Ref                 | 169                             | 23.6  | Ref   | Ref                 | Ref                 | 133                                                 | 14.5 | Ref   | Ref                 | Ref                 |
| 1.01-2.00       | 144              | 26.6 | 1.36  | 1.36                | 1.32                | 95                              | 32.6  | 1.40  | 1.38                | 1.34                | 49                                                  | 19.7 | 1.31  | 1.34                | 1.31                |
| 2.01-3.00       | 59               | 34.7 | 1.45  | 1.31                | 1.19                | 40                              | 40.4  | 1.54  | 1.37                | 1.16                | 19                                                  | 26.7 | 1.29  | 1.22                | 1.26                |
| 3.01-10.0       | 111              | 52.7 | 2.17  | 2.10                | 2.00                | 77                              | 64.5  | 2.26  | 2.24                | 2.12                | 34                                                  | 37.3 | 1.98  | 1.80                | 1.70                |
| >10.0           | 50               | 82.9 | 3.13  | 2.66                | 2.34                | 38                              | 114.1 | 4.07  | 3.42                | 2.79                | 13                                                  | 46.1 | 1.58  | 1.40                | 1.56                |
| <i>P</i> -trend |                  |      | <.001 | <.001               | <.001               |                                 |       | <.001 | <.001               | <.001               |                                                     |      | 0.002 | 0.009               | 0.015               |
| <b>Women</b>    |                  |      |       |                     |                     |                                 |       |       |                     |                     |                                                     |      |       |                     |                     |
| ≤1.00           | 288              | 7.7  | Ref   | Ref                 | Ref                 | 137                             | 5.5   | Ref   | Ref                 | Ref                 | 151                                                 | 12.1 | Ref   | Ref                 | Ref                 |
| 1.01-2.00       | 88               | 10.8 | 1.13  | 1.08                | 0.99                | 36                              | 9.4   | 1.60  | 1.48                | 1.31                | 52                                                  | 12.1 | 0.86  | 0.86                | 0.81                |
| 2.01-3.00       | 27               | 10.7 | 1.16  | 1.17                | 1.2                 | 10                              | 9.1   | 1.48  | 1.50                | 1.47                | 17                                                  | 12.0 | 0.96  | 0.98                | 1.03                |
| 3.01-10.0       | 38               | 12.9 | 1.31  | 1.24                | 1.29                | 20                              | 15.8  | 2.58  | 2.48                | 2.57                | 18                                                  | 10.7 | 0.75  | 0.71                | 0.74                |
| >10.0           | 15               | 20.4 | 1.89  | 1.61                | 1.28                | 7                               | 18.9  | 2.16  | 1.75                | 1.42                | 8                                                   | 21.9 | 1.66  | 1.47                | 1.17                |
| <i>P</i> -trend |                  |      | 0.019 | 0.074               | 0.161               |                                 |       | <.001 | 0.001               | 0.002               |                                                     |      | 0.856 | 0.635               | 0.538               |

E: Number of death, MR: Mortality rate (10 000 person year), Ref: Reference

aHR: Adjusted for age, gender, education, job, marital status, BMI, non-communicable disease history, smoking, alcohol consumption and exercise

HR<sub>1year</sub>: aHR after exclude subjects who died within 1 yr f/u time

HR<sub>2year</sub>: aHR after exclude subjects who died within 2 yr f/u time

**Table 3.** The association between serum *hsCRP* level and cardiovascular disease mortality by gender and non-communicable disease history (NCD<sub>history</sub>) at recruitment.

|                 | Cardiovascular disease mortality |      |       |                     |                     | Healthy subjects at recruitment |      |       |                     |                     | Subjects with NCD <sub>history</sub> at recruitment |      |       |                     |                     |
|-----------------|----------------------------------|------|-------|---------------------|---------------------|---------------------------------|------|-------|---------------------|---------------------|-----------------------------------------------------|------|-------|---------------------|---------------------|
|                 | E                                | MR   | aHR   | HR <sub>1year</sub> | HR <sub>2year</sub> | E                               | MR   | aHR   | HR <sub>1year</sub> | HR <sub>2year</sub> | E                                                   | MR   | aHR   | HR <sub>1year</sub> | HR <sub>2year</sub> |
| Total           |                                  |      |       |                     |                     |                                 |      |       |                     |                     |                                                     |      |       |                     |                     |
| ≤1.00           | 167                              | 3.1  | Ref   | Ref                 | Ref                 | 58                              | 1.7  | Ref   | Ref                 | Ref                 | 109                                                 | 5.5  | Ref   | Ref                 | Ref                 |
| 1.01-2.00       | 79                               | 5.8  | 1.35  | 1.37                | 1.23                | 18                              | 2.8  | 1.19  | 1.15                | 0.94                | 64                                                  | 8.4  | 1.42  | 1.46                | 1.36                |
| 2.01-3.00       | 42                               | 10.0 | 2.06  | 2.05                | 2.02                | 6                               | 3.3  | 1.47  | 1.54                | 1.46                | 36                                                  | 15.0 | 2.28  | 2.25                | 2.26                |
| 3.01-10.0       | 39                               | 7.7  | 1.45  | 1.38                | 1.44                | 8                               | 3.7  | 1.44  | 1.50                | 1.70                | 31                                                  | 1.08 | 1.48  | 1.37                | 1.40                |
| >10.0           | 13                               | 9.6  | 1.81  | 1.76                | 1.59                | 3                               | 4.6  | 2.02  | 2.10                | 1.58                | 10                                                  | 14.3 | 1.85  | 1.74                | 1.68                |
| <i>P</i> -trend |                                  |      | 0.001 | 0.002               | 0.004               |                                 |      | 0.130 | 0.100               | 0.162               |                                                     |      | 0.001 | 0.006               | 0.009               |
| Men             |                                  |      |       |                     |                     |                                 |      |       |                     |                     |                                                     |      |       |                     |                     |
| ≤1.00           | 89                               | 5.5  | Ref   | Ref                 | Ref                 | 25                              | 2.7  | Ref   | Ref                 | Ref                 | 64                                                  | 8.9  | Ref   | Ref                 | Ref                 |
| 1.01-2.00       | 45                               | 8.3  | 1.33  | 1.32                | 1.25                | 12                              | 4.8  | 1.30  | 1.22                | 1.22                | 33                                                  | 11.3 | 1.31  | 1.33                | 1.33                |
| 2.01-3.00       | 30                               | 17.6 | 2.70  | 2.67                | 2.53                | 3                               | 4.2  | 1.31  | 1.37                | 1.37                | 27                                                  | 27.3 | 3.05  | 2.99                | 2.99                |
| 3.01-10.0       | 24                               | 11.4 | 1.43  | 1.36                | 1.46                | 6                               | 6.6  | 1.70  | 1.79                | 1.79                | 18                                                  | 15.1 | 1.42  | 1.21                | 1.21                |
| >10.0           | 8                                | 13.0 | 1.90  | 2.02                | 1.70                | 3                               | 10.6 | 3.42  | 3.61                | 3.61                | 5                                                   | 15.0 | 1.59  | 1.62                | 1.62                |
| <i>P</i> -trend |                                  |      | 0.002 | 0.003               | 0.009               |                                 |      | 0.053 | 0.038               | 0.062               |                                                     |      | 0.015 | 0.027               | 0.047               |
| Women           |                                  |      |       |                     |                     |                                 |      |       |                     |                     |                                                     |      |       |                     |                     |
| ≤1.00           | 78                               | 2.1  | Ref   | Ref                 | Ref                 | 33                              | 1.3  | Ref   | Ref                 | Ref                 | 45                                                  | 6.3  | Ref   | Ref                 | Ref                 |
| 1.01-2.00       | 34                               | 4.2  | 1.41  | 1.46                | 1.25                | 6                               | 1.6  | 1.09  | 1.13                | 0.62                | 28                                                  | 9.6  | 1.60  | 1.66                | 1.58                |
| 2.01-3.00       | 12                               | 4.8  | 1.26  | 1.30                | 1.44                | 3                               | 2.7  | 1.65  | 1.70                | 1.86                | 9                                                   | 9.1  | 1.17  | 1.20                | 1.39                |
| 3.01-10.0       | 15                               | 5.1  | 1.51  | 1.45                | 1.44                | 2                               | 1.6  | 1.06  | 1.07                | 1.14                | 13                                                  | 10.9 | 1.75  | 1.64                | 1.65                |
| >10.0           | 5                                | 6.8  | 1.72  | 1.35                | 1.45                | 0                               | -    | -     | -                   | -                   | 5                                                   | 15.0 | 2.51  | 1.91                | 2.07                |
| <i>P</i> -trend |                                  |      | 0.092 | 0.177               | 0.168               |                                 |      | 0.940 | 0.998               | 0.922               |                                                     |      | 0.035 | 0.092               | 0.078               |

E: Number of death, MR: Mortality rate (10 000 person year), Ref: Reference

aHR: Adjusted for age, gender, education, job, marital status, BMI, non-communicable disease history, smoking, alcohol consumption and exercise

HR<sub>1year</sub>: aHR after exclude subjects who died within 1 yr f/u time

HR<sub>2year</sub>: aHR after exclude subjects who died within 2 yr f/u time

**DISCUSSION**

This study suggests that the risk of all-cause mortality was associated with elevated *hsCRP* levels with a dose-response manner in both gender among Asian who have reported low *hsCRP* levels compared to other races, and was not influenced by *NCD<sub>history</sub>*. Otherwise, the association was influenced by gender and *NCD<sub>history</sub>* although a dose-response association of *hsCRP* with the risk of cancer- and CVD-mortality was also observed in this population. The level of *hsCRP* was not associated with the risk of cancer- mortality among women with *NCD<sub>history</sub>*. The risk effect of high *hsCRP* level on CVD mortality was predominantly observed in men with *NCD<sub>history</sub>*.

Several large cohorts[10-12, 14] have suggested that serum *hsCRP* levels may differ according to ethnic background, with the highest concentrations seen in African Americans, followed by Hispanic, White, Chinese and Japanese individuals. Although the reason for this ethnic difference is not clearly resolved, genetic diversity[27], the relatively low BMI in Asian populations and ethnic differences in diet and lifestyle[28] have been suggested. Although the extent to which these findings adopt to Asian populations has been unclear, several recent studies[11, 16] conducted in Asia reported a positive association of *hsCRP* with mortality risk. In this population, the *hsCRP* level was associated with the risk of all-cause mortality in a dose-dependent manner, even though the level of *hsCRP* was lower than that in the western population. A meta-analysis[29] and large cohort studies[3-6] supported the robustness of the association regardless of adjusted confounders, the cut-off point of CRP level and exclusion deaths within the first 2 years of follow-up.

The reason for the discrepancy in *hsCRP* levels with respect to gender is not clearly resolved, although several studies suggested different lifestyle and metabolic risk factors between men and women[30] and genetic diversity[27]. A high level of serum *hsCRP* in our population was positively related to the increased risk of all-cause mortality in both genders, supported by several previous studies[8, 16, 31]. Nevertheless, several studies reported no association of *hsCRP* levels with all-cause mortality was observed in women[7, 16]. In particular, the association was shown in postmenopausal women only, which might suggest the protective effect of endogenous female hormones on the low level of *hsCRP*[32]; the average *hsCRP* level was 0.48 and 0.68 mg/L for premenopausal and postmenopausal women in this study. The protective effect could be supported by the proposition that estrogen or progesterone might to some extent repress the detrimental effects of chronic inflammation on tissue damage[33].



1  
2  
3  
4 482 Inflammation has emerged as an important factor in the processes of NCD, including CVD[17], cancer[18],  
5  
6 483 type 2 diabetes[20], COPD[19, 34] and fracture[21]. In addition, medications that had taken to treat any specific  
7  
8 484 NCD, such as rennin–angiotensin system inhibitors[35] and statins and thiazolidinedione[36], could influence  
9  
10 485 the level of *hsCRP*. The association between *hsCRP* and the mortality risk was not attenuated by  $NCD_{history}$  in  
11  
12 486 either gender in this study, but the statistical significance of the association disappeared in women after  
13  
14 487 sensitivity analysis ( $aHR_{2year}$ ). A dose-response relationship between *hsCRP* level and all-cause mortality risk  
15  
16 488 was pronounced in both genders. On the other hand, the positive association of *hsCRP* with the risk of all-cause  
17  
18 489 mortality risk was significantly observed in only men with  $NCD_{history}$  but not in women with  $NCD_{history}$ . The  
19  
20 490 attenuated effect of  $NCD_{history}$  on the association between *hsCRP* and the risk of cancer-mortality was not  
21  
22 491 observed in men, consistent with results from several studies which reported the associations among healthy  
23  
24 492 men[3] or cancer patients[37, 38] only. Most studies[3, 4, 6, 7, 15, 16, 31, 39] supported that CVD mortality  
25  
26 493 increased with elevated *hsCRP* levels, predominantly in men[4, 7, 15, 16]. Although *hsCRP* levels are lower in  
27  
28 494 our population than in other races, the level of *hsCRP* was positively associated with CVD mortality in men but  
29  
30 495 not in women, similar to previous studies[7, 15, 16, 31, 39]. After stratification by gender and  $NCD_{history}$ , the  
31  
32 496 association between *hsCRP* and the risk of CVD mortality was dominant in subjects with  $NCD_{history}$  in this  
33  
34 497 study. Although many interventional studies have been conducted recently on anti-inflammatory drugs for the  
35  
36 498 prevention of cardiovascular disease, the results are controversial. According to the results of our study, elevated  
37  
38 499 inflammatory markers in people with chronic disease were associated with an increased risk of CVD mortality.  
39  
40 500 This suggests that CVD-mortality in people with chronic diseases might be reduced by use of anti-inflammatory  
41  
42 501 medication.

43 502 This study has several strengths because of the large population-based prospective study; it makes possible 1)  
44  
45 503 to adjust for confounders; 2) to examine sensitivity analysis after excluding death before 1 or 2 years from  
46  
47 504 recruitment; 3) to assess an advanced analysis after stratification by gender and  $NCD_{history}$ ; 4) to examine the  
48  
49 505 association using various cut-off points of *hsCRP* considering low serum *hsCRP* levels in Asian populations;  
50  
51 506 and 5) to evaluate the complex (i.e., nonlinear) hazard functions using restricted cubic splines on the association  
52  
53 507 between continuous *hsCRP* levels and the risk of mortality. In particular, most previous studies excluded  
54  
55 508 subjects with more than 10 mg/L *hsCRP* because of their relatively low sample size or reflecting acute phase  
56  
57 509 reactions of severe inflammation, but we examined the effect of very high *hsCRP* concentration on the risk of  
58  
59 510 mortality because it is possible to be more concerning for these subjects in the future. The *hsCRP* level of this  
60

1  
2  
3  
4 511 study, in addition, was measured within 18 hours in a single institution to minimize measurement error/bias  
5  
6 512 from institutional variation to avoid bias from measurement or long-term storage before analysis.  
7

8 513 Despite of those strengths, it is also several limitations. First, the use of a single measurement of *hsCRP* at  
9  
10 514 baseline could reflect the inaccurate status of blood *hsCRP* levels in the study participants and increase the  
11  
12 515 instability of *hsCRP* due to random fluctuations over time. Nevertheless, a report [40] on the long-term *hsCRP*  
13  
14 516 variability suggested that the *hsCRP* variability within individual is relatively small and that the variability  
15  
16 517 could not account for the association. Second, our study lacked information on medication use at recruitment  
17  
18 518 and during the follow-up period. Several medications related to NCDs, including statins, angiotensin-converting  
19  
20 519 enzyme inhibitors, fibrates, niacin, thiazolidinedione and estrogen/progestogen hormone, could influence the  
21  
22 520 *hsCRP* level[37]; however, we tried to overcome this limitation through advanced analysis after stratification by  
23  
24 521 *NCD<sub>history</sub>*. Third, because there is no available information on hormone-replacement therapy (HRT) among  
25  
26 522 women, which could not examine the influence of HRT on the association of *hsCRP* with the risk of hormone-  
27  
28 523 related cancer or CVD mortality among women, we could not suggest the effect of female hormones on the  
29  
30 524 association. In addition, further studies are needed on the effects of obesity although the inverse relationship  
31  
32 525 between all-cause mortality with obesity in our population was consistent to Wei's report in Asian[41]. On the  
33  
34 526 other hand, the inverse association of alcohol drinking with all-cause mortality couldn't interpret directly  
35  
36 527 because our report wasn't separated the distinguish between mild drinkers and abuse alcohol drinker, which  
37  
38 528 requires additional research for our population in the future.

39 529 In conclusion, the association of *hsCRP* level is dose-responsively increased with the risk of all-cause  
40  
41 530 mortality in men and women (particularly postmenopausal women), which was not influenced by the association  
42  
43 531 was not observed in women with *NCD<sub>history</sub>*. Otherwise, the association of *hsCRP* level with the risk of cancer-  
44  
45 532 and CVD-mortality could be attenuated by gender or *NCD<sub>history</sub>*.

46 533

47 534

50 535 **Figure 1** Flow diagram of analytical sample in current study using Health Examinees cohort.

52 536 **Figure 2** A dose-response association between serum *hsCRP* level and risk of all-cause mortality in all (a),  
53  
54 537 healthy subjects at recruitment (b), and subjects with non-communicable disease history (*NCD<sub>history</sub>*) at  
55  
56 538 recruitment (c).

58 539 **Figure 3** Kaplan-Meier crude survival curves for cancer-mortality according to serum *hsCRP* level in all (a)

1  
2  
3  
4 540 men (b), women (c), healthy subjects at recruitment (d), and subjects with non-communicable disease history  
5  
6 541 (NCD<sub>history</sub>) at recruitment (e).

7  
8 542 **Figure 4** Kaplan-Meier crude survival curves for cardiovascular disease mortality according to serum *hsCRP*  
9  
10 543 level in all (a), men (b), women (c), healthy subjects at recruitment (d), and subjects with non-communicable  
11  
12 544 disease history (NCD<sub>history</sub>) at recruitment (e).

13  
14 545

15  
16 546

17 547 **Contributors**

18  
19 548 SAL, XS and DK: designed and conducted the research, SAL and SOK: analyzed the data and performed the  
20  
21 549 statistical analyses; HP and JKL: managed data mining and collection; SAL: wrote the manuscript and had primary  
22  
23 550 responsibility for the final content of the manuscript; and all authors: read and approved the final manuscript.

24  
25 551

26  
27 552 **Funding** None.

28  
29 553

30  
31 554 **Competing interests** None declared.

32  
33 555 **Patient consent for publication** Not required.

34  
35 556 **Ethics approval** The Institutional Review Board of the Seoul National University Hospital, Seoul, Korea,  
36  
37 557 approved it for statistical analysis (IRB No. E-1503-103-657).

38  
39 558

40  
41 559 **Provenance and peer review** Not commissioned; externally peer reviewed.

42  
43 560 **Data availability statement**

44  
45 561 No additional data available.

46  
47 562

48  
49 563

50  
51 564 **REFERENCES**

52 565 1 Pepys MB, Hirschfield GM. C-reactive protein: a critical update. *The Journal of clinical*  
53  
54 566 *investigation* 2003;**111**:1805-12.

55  
56 567 2 Elias-Smale SE, Kardys I, Oudkerk M, *et al*. C-reactive protein is related to extent and  
57  
58 568 progression of coronary and extra-coronary atherosclerosis; results from the Rotterdam study.

59 569 *Atherosclerosis* 2007;**195**:e195-202.

60

- 1  
2  
3  
4 570 3 Koenig W, Khuseyinova N, Baumert J, *et al.* Prospective study of high-sensitivity C-reactive  
5 571 protein as a determinant of mortality: results from the MONICA/KORA Augsburg Cohort Study,  
6 572 1984-1998. *Clinical chemistry* 2008;**54**:335-42.
- 9 573 4 Ahmadi-Abhari S, Luben RN, Wareham NJ, *et al.* Seventeen year risk of all-cause and  
10 574 cause-specific mortality associated with C-reactive protein, fibrinogen and leukocyte count in men  
11 575 and women: the EPIC-Norfolk study. *European journal of epidemiology* 2013;**28**:541-50.
- 14 576 5 Kuoppamaki M, Salminen M, Vahlberg T, *et al.* High sensitive C-reactive protein (hsCRP),  
15 577 cardiovascular events and mortality in the aged: a prospective 9-year follow-up study. *Archives of*  
16 578 *gerontology and geriatrics* 2015;**60**:112-7.
- 18 579 6 Zuo H, Ueland PM, Ulvik A, *et al.* Plasma Biomarkers of Inflammation, the Kynurenine  
20 580 Pathway, and Risks of All-Cause, Cancer, and Cardiovascular Disease Mortality: The Hordaland  
21 581 Health Study. *American journal of epidemiology* 2016;**183**:249-58.
- 23 582 7 Nisa H, Hirata A, Kohno M, *et al.* High-Sensitivity C-Reactive Protein and Risks of All-  
24 583 Cause and Cause-Specific Mortality in a Japanese Population. *Asian Pacific journal of cancer*  
25 584 *prevention : APJCP* 2016;**17**:2643-8.
- 28 585 8 Li Y, Zhong X, Cheng G, *et al.* Hs-CRP and all-cause, cardiovascular, and cancer mortality  
29 586 risk: A meta-analysis. *Atherosclerosis* 2017;**259**:75-82.
- 31 587 9 Vasto S, Candore G, Balistreri CR, *et al.* Inflammatory networks in ageing, age-related  
32 588 diseases and longevity. *Mechanisms of ageing and development* 2007;**128**:83-91.
- 34 589 10 Kelley-Hedgpeath A, Lloyd-Jones DM, Colvin A, *et al.* Ethnic differences in C-reactive  
35 590 protein concentrations. *Clinical chemistry* 2008;**54**:1027-37.
- 37 591 11 Albert MA, Glynn RJ, Buring J, *et al.* C-reactive protein levels among women of various  
38 592 ethnic groups living in the United States (from the Women's Health Study). *The American journal of*  
39 593 *cardiology* 2004;**93**:1238-42.
- 42 594 12 Khera A, McGuire DK, Murphy SA, *et al.* Race and gender differences in C-reactive protein  
43 595 levels. *Journal of the American College of Cardiology* 2005;**46**:464-9.
- 45 596 13 Lakoski SG, Cushman M, Criqui M, *et al.* Gender and C-reactive protein: data from the  
46 597 Multiethnic Study of Atherosclerosis (MESA) cohort. *American heart journal* 2006;**152**:593-8.
- 48 598 14 Matthews KA, Sowers MF, Derby CA, *et al.* Ethnic differences in cardiovascular risk factor  
49 599 burden among middle-aged women: Study of Women's Health Across the Nation (SWAN). *American*  
50 600 *heart journal* 2005;**149**:1066-73.
- 53 601 15 Lee JH, Yeom H, Kim HC, *et al.* C-reactive Protein Concentration Is Associated With a  
54 602 Higher Risk of Mortality in a Rural Korean Population. *Journal of preventive medicine and public*  
55 603 *health = Yebang Uihakhoe chi* 2016;**49**:275-87.
- 58 604 16 Sung KC, Ryu S, Chang Y, *et al.* C-reactive protein and risk of cardiovascular and all-cause  
59 605 mortality in 268 803 East Asians. *European heart journal* 2014;**35**:1809-16.

- 1  
2  
3  
4 606 17 Kengne AP, Batty GD, Hamer M, *et al.* Association of C-reactive protein with  
5  
6 607 cardiovascular disease mortality according to diabetes status: pooled analyses of 25,979 participants  
7  
8 608 from four U.K. prospective cohort studies. *Diabetes care* 2012;**35**:396-403.
- 9 609 18 Heikkila K, Ebrahim S, Lawlor DA. A systematic review of the association between  
10  
11 610 circulating concentrations of C reactive protein and cancer. *Journal of epidemiology and community*  
12  
13 611 *health* 2007;**61**:824-33.
- 14 612 19 Dahl M, Vestbo J, Lange P, *et al.* C-reactive protein as a predictor of prognosis in chronic  
15  
16 613 obstructive pulmonary disease. *American journal of respiratory and critical care medicine*  
17  
18 614 2007;**175**:250-5.
- 19 615 20 Wang X, Bao W, Liu J, *et al.* Inflammatory markers and risk of type 2 diabetes: a systematic  
20  
21 616 review and meta-analysis. *Diabetes care* 2013;**36**:166-75.
- 22 617 21 Ishii S, Cauley JA, Greendale GA, *et al.* C-reactive protein, bone strength, and nine-year  
23  
24 618 fracture risk: data from the Study of Women's Health Across the Nation (SWAN). *Journal of bone*  
25  
26 619 *and mineral research : the official journal of the American Society for Bone and Mineral Research*  
27  
28 620 2013;**28**:1688-98.
- 29 621 22 Kim Y, Han BG, Ko GESg. Cohort Profile: The Korean Genome and Epidemiology Study  
30  
31 622 (KoGES) Consortium. *International journal of epidemiology* 2017;**46**:1350.
- 32 623 23 Shin S, Lee HW, Kim CE, *et al.* Egg Consumption and Risk of Metabolic Syndrome in  
33  
34 624 Korean Adults: Results from the Health Examinees Study. *Nutrients* 2017;**9**.
- 35 625 24 Pan WH, Yeh WT. How to define obesity? Evidence-based multiple action points for public  
36  
37 626 awareness, screening, and treatment: an extension of Asian-Pacific recommendations. *Asia Pacific*  
38  
39 627 *journal of clinical nutrition* 2008;**17**:370-4.
- 40 628 25 National Cholesterol Education Program Expert Panel on Detection E, Treatment of High  
41  
42 629 Blood Cholesterol in A. Third Report of the National Cholesterol Education Program (NCEP) Expert  
43  
44 630 Panel on Detection, Evaluation, and Treatment of High Blood Cholesterol in Adults (Adult Treatment  
45  
46 631 Panel III) final report. *Circulation* 2002;**106**:3143-421.
- 47 632 26 Heinzl H, Kaider A. Gaining more flexibility in Cox proportional hazards regression models  
48  
49 633 with cubic spline functions. *Computer methods and programs in biomedicine* 1997;**54**:201-8.
- 50 634 27 MacGregor AJ, Gallimore JR, Spector TD, *et al.* Genetic effects on baseline values of C-  
51  
52 635 reactive protein and serum amyloid a protein: a comparison of monozygotic and dizygotic twins.  
53  
54 636 *Clinical chemistry* 2004;**50**:130-4.
- 55 637 28 Ledue TB, Rifai N. Preanalytic and analytic sources of variations in C-reactive protein  
56  
57 638 measurement: implications for cardiovascular disease risk assessment. *Clinical chemistry*  
58  
59 639 2003;**49**:1258-71.  
60

- 1  
2  
3  
4 640 29 Emerging Risk Factors C, Kaptoge S, Di Angelantonio E, *et al.* C-reactive protein  
5 641 concentration and risk of coronary heart disease, stroke, and mortality: an individual participant meta-  
6 642 analysis. *Lancet* 2010;**375**:132-40.  
7  
8  
9 643 30 Lee YJ, Lee JH, Shin YH, *et al.* Gender difference and determinants of C-reactive protein  
10 644 level in Korean adults. *Clinical chemistry and laboratory medicine* 2009;**47**:863-9.  
11  
12 645 31 Doran B, Zhu W, Muennig P. Gender differences in cardiovascular mortality by C-reactive  
13 646 protein level in the United States: evidence from the National Health and Nutrition Examination  
14 647 Survey III. *American heart journal* 2013;**166**:45-51.  
15  
16  
17 648 32 Gaskins AJ, Wilchesky M, Mumford SL, *et al.* Endogenous reproductive hormones and C-  
18 649 reactive protein across the menstrual cycle: the BioCycle Study. *American journal of epidemiology*  
19 650 2012;**175**:423-31.  
20  
21  
22 651 33 Gilliver SC. Sex steroids as inflammatory regulators. *The Journal of steroid biochemistry*  
23 652 *and molecular biology* 2010;**120**:105-15.  
24  
25 653 34 Man SF, Connett JE, Anthonisen NR, *et al.* C-reactive protein and mortality in mild to  
26 654 moderate chronic obstructive pulmonary disease. *Thorax* 2006;**61**:849-53.  
27  
28 655 35 Di Napoli M, Papa F. Angiotensin-converting enzyme inhibitor use is associated with  
29 656 reduced plasma concentration of C-reactive protein in patients with first-ever ischemic stroke. *Stroke*  
30 657 2003;**34**:2922-9.  
31  
32  
33 658 36 Sidhu JS, Cowan D, Kaski JC. The effects of rosiglitazone, a peroxisome proliferator-  
34 659 activated receptor-gamma agonist, on markers of endothelial cell activation, C-reactive protein, and  
35 660 fibrinogen levels in non-diabetic coronary artery disease patients. *Journal of the American College of*  
36 661 *Cardiology* 2003;**42**:1757-63.  
37  
38  
39 662 37 Heikkila K, Ebrahim S, Rumley A, *et al.* Associations of circulating C-reactive protein and  
40 663 interleukin-6 with survival in women with and without cancer: findings from the British Women's  
41 664 Heart and Health Study. *Cancer epidemiology, biomarkers & prevention : a publication of the*  
42 665 *American Association for Cancer Research, cosponsored by the American Society of Preventive*  
43 666 *Oncology* 2007;**16**:1155-9.  
44  
45  
46 667 38 Marsik C, Kazemi-Shirazi L, Schickbauer T, *et al.* C-reactive protein and all-cause mortality  
47 668 in a large hospital-based cohort. *Clinical chemistry* 2008;**54**:343-9.  
48  
49  
50 669 39 Proctor MJ, McMillan DC, Horgan PG, *et al.* Systemic inflammation predicts all-cause  
51 670 mortality: a glasgow inflammation outcome study. *PloS one* 2015;**10**:e0116206.  
52  
53  
54 671 40 Chen TH, Gona P, Sutherland PA, *et al.* Long-term C-reactive protein variability and  
55 672 prediction of metabolic risk. *The American journal of medicine* 2009;**122**:53-61.  
56  
57  
58 673 41 Zheng W, McLerran DF, Rolland B, *et al.* Association between Body-Mass Index and Risk  
59 674 of Death in More Than 1 Million Asians, *N Engl J Med* 2011; 364:719-729.  
60 675



Figure 1 Flow diagram of analytical sample in current study using Health Examinees cohort.  
HEXA: Health Examinees, hsCRP: High sensitivity C-reactive protein

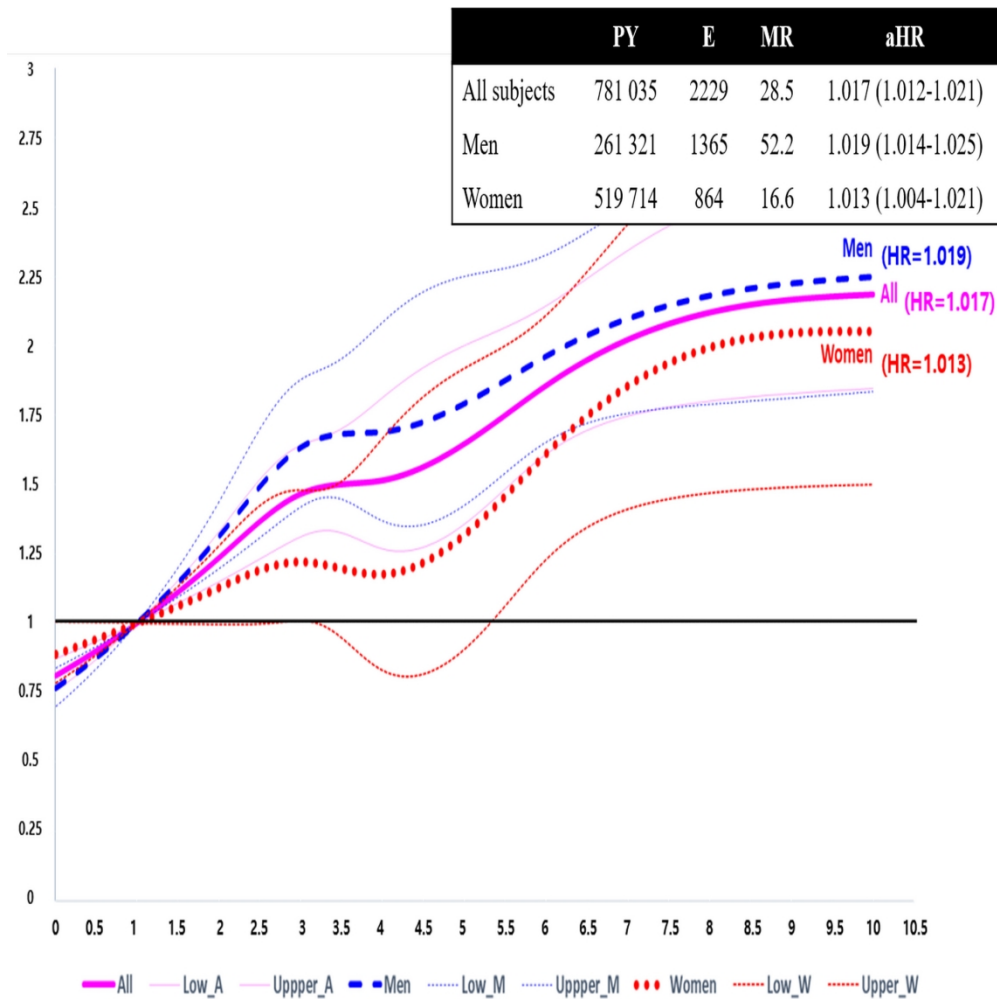

Figure 2 (a) A dose-response association between serum hsCRP level and risk of all-cause mortality in all subjects at recruitment. PY: Person-year, E: Number of death, MR: Mortality rate (10 000 person year) aHR: Adjusted for age, gender, education, job, marital status, BMI, non-communicable disease history, smoking, alcohol consumption and exercise. Low\_A and Upper\_A: 95%CI for all subjects. Low\_M and Upper\_M: 95%CI for men. Low\_W and Upper\_W: 95%CI for women.



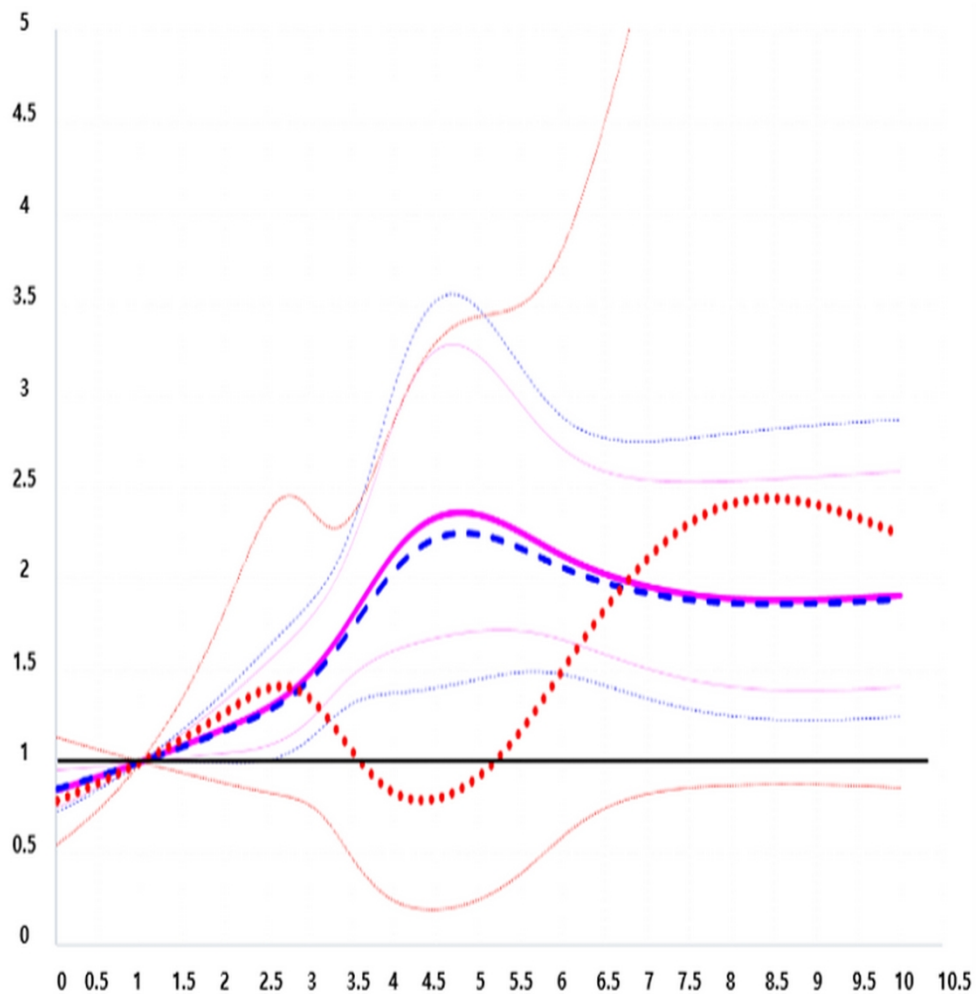

Figure 2 (b) A dose-response association between serum hsCRP level and risk of all-cause mortality in healthy subjects at recruitment. Low\_A and Upper\_A: 95%CI for all subjects Low\_M and Upper\_M: 95%CI for men Low\_W and Upper\_W: 95%CI for women

1  
2  
3  
4  
5  
6  
7  
8  
9  
10  
11  
12  
13  
14  
15  
16  
17  
18  
19  
20  
21  
22  
23  
24  
25  
26  
27  
28  
29  
30  
31  
32  
33  
34  
35  
36  
37  
38  
39  
40  
41  
42  
43  
44  
45  
46  
47  
48  
49  
50  
51  
52  
53  
54  
55  
56  
57  
58  
59  
60

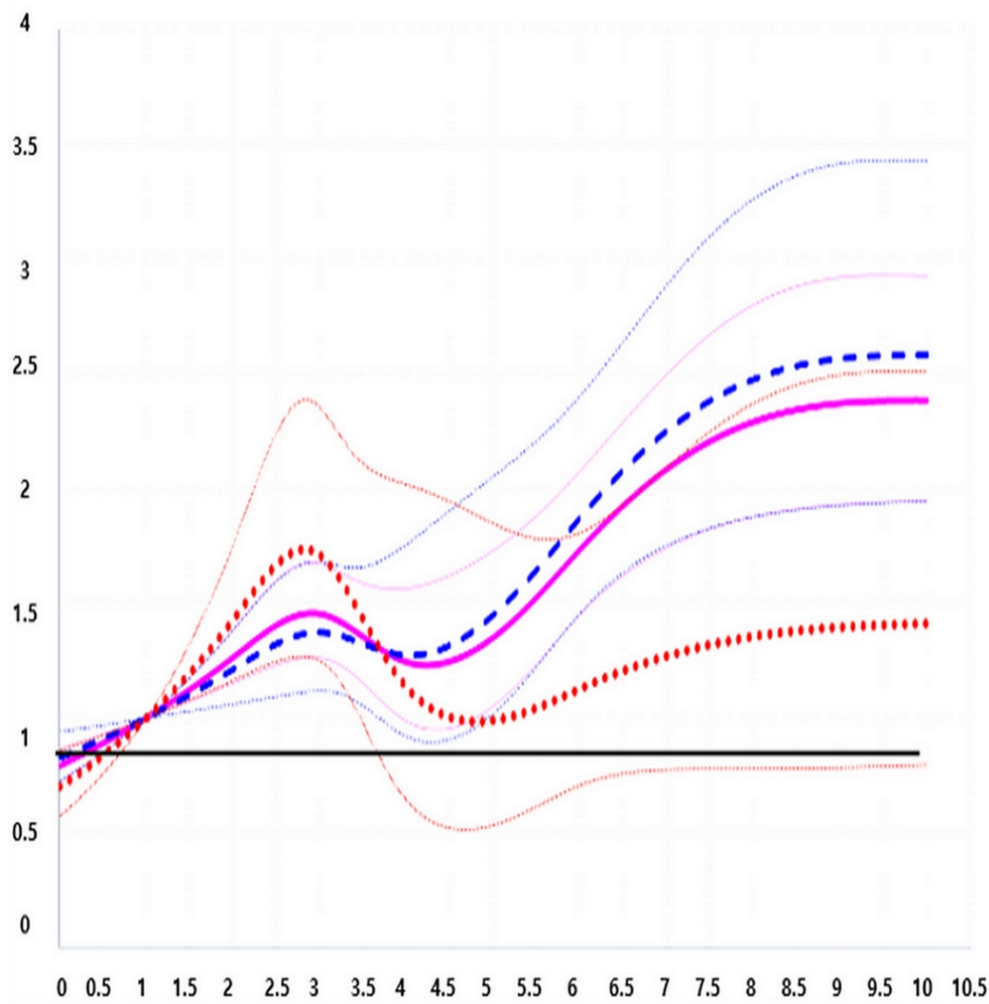

Figure 2 (c) A dose-response association between serum hsCRP level and risk of all-cause mortality in subjects with non-communicable disease history (NCDhistory) at recruitment. Low\_A and Upper\_A: 95%CI for all subjects Low\_M and Upper\_M: 95%CI for men Low\_W and Upper\_W: 95%CI for women

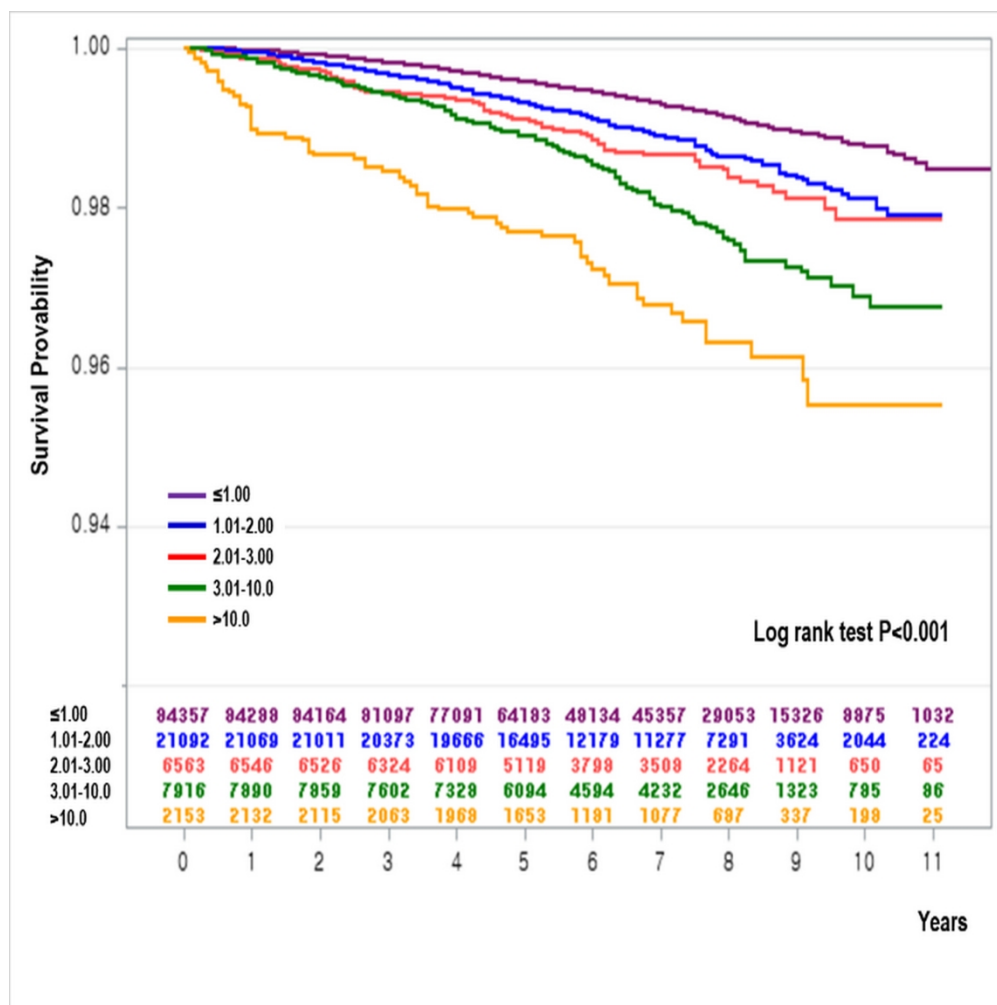

Figure 3 (a) Kaplan-Meier crude survival curves for cancer-mortality according to serum hsCRP level in all subjects at recruitment.

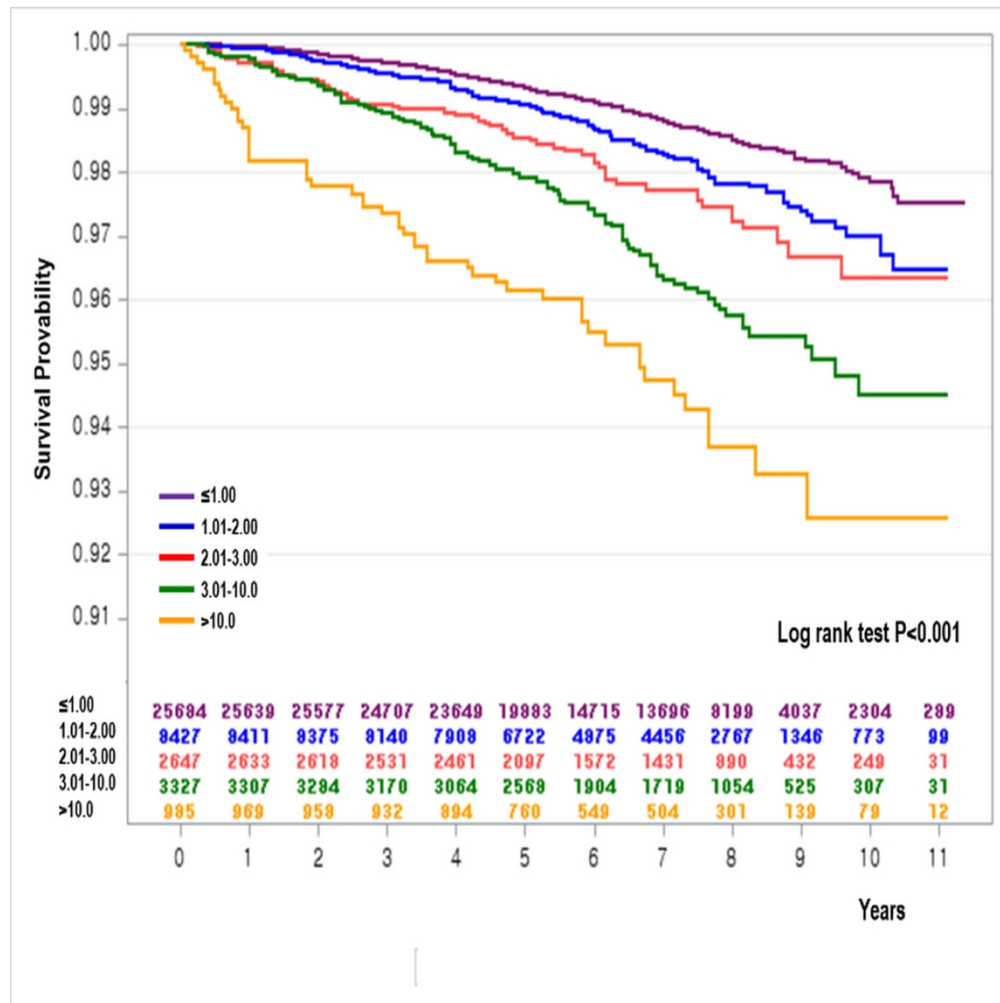

Figure 3 (b) Kaplan-Meier crude survival curves for cancer-mortality according to serum hsCRP level in men at recruitment.

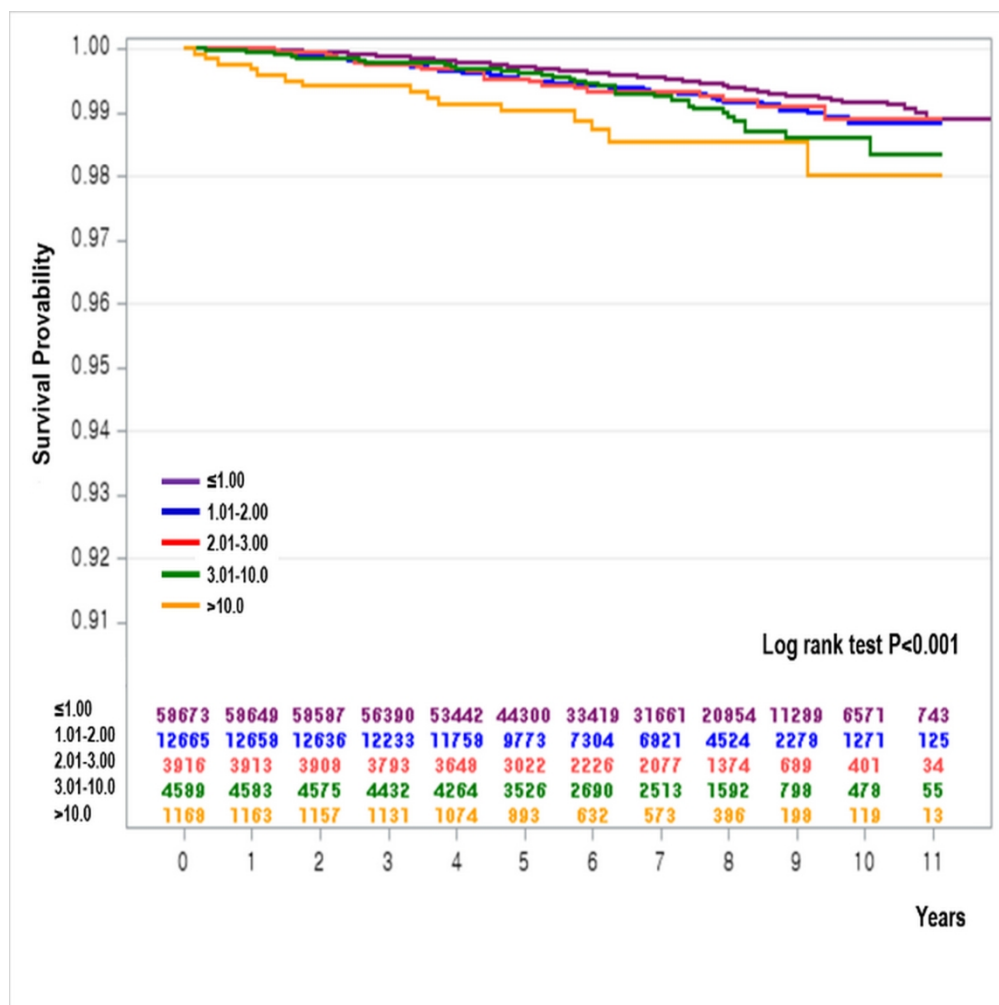

Figure 3 (c) Kaplan-Meier crude survival curves for cancer-mortality according to serum hsCRP level in women at recruitment.

1  
2  
3  
4  
5  
6  
7  
8  
9  
10  
11  
12  
13  
14  
15  
16  
17  
18  
19  
20  
21  
22  
23  
24  
25  
26  
27  
28  
29  
30  
31  
32  
33  
34  
35  
36  
37  
38  
39  
40  
41  
42  
43  
44  
45  
46  
47  
48  
49  
50  
51  
52  
53  
54  
55  
56  
57  
58  
59  
60

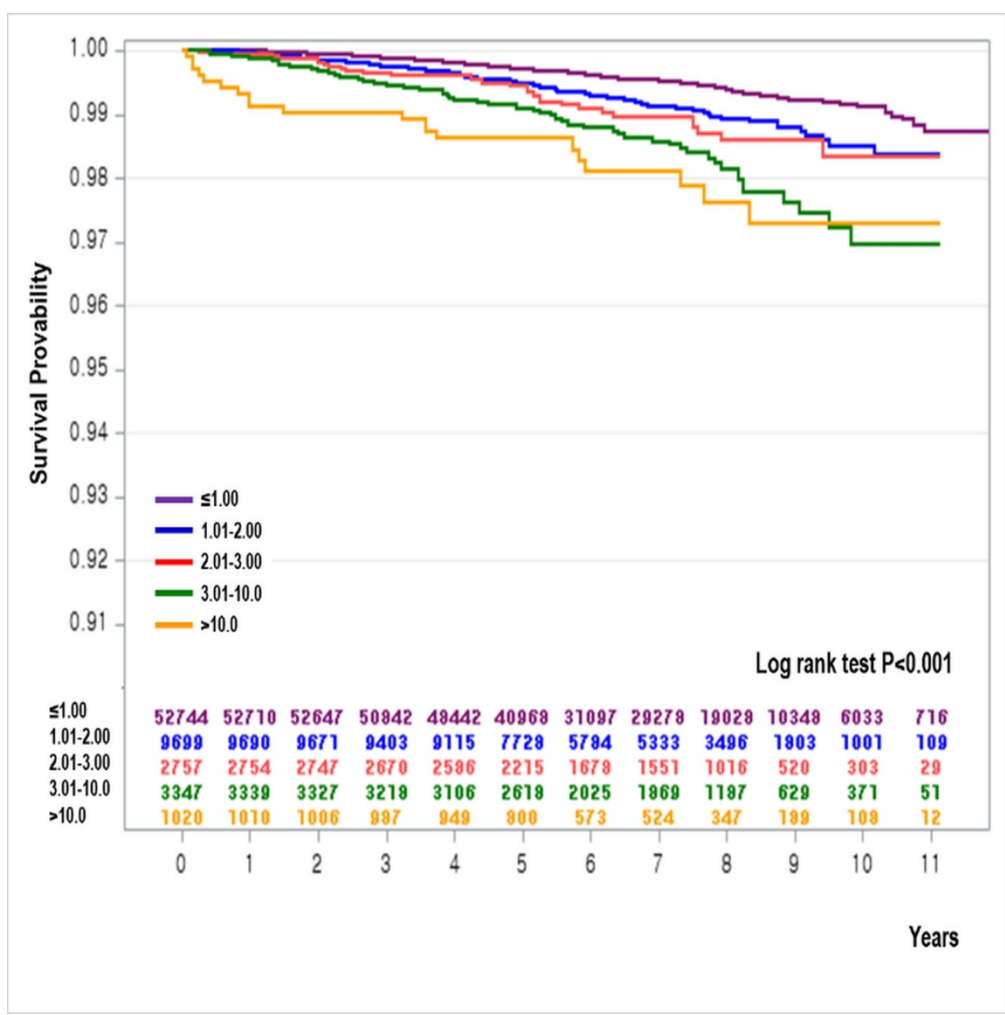

Figure 3 (d) Kaplan-Meier crude survival curves for cancer-mortality according to serum hsCRP level in healthy subjects at recruitment.

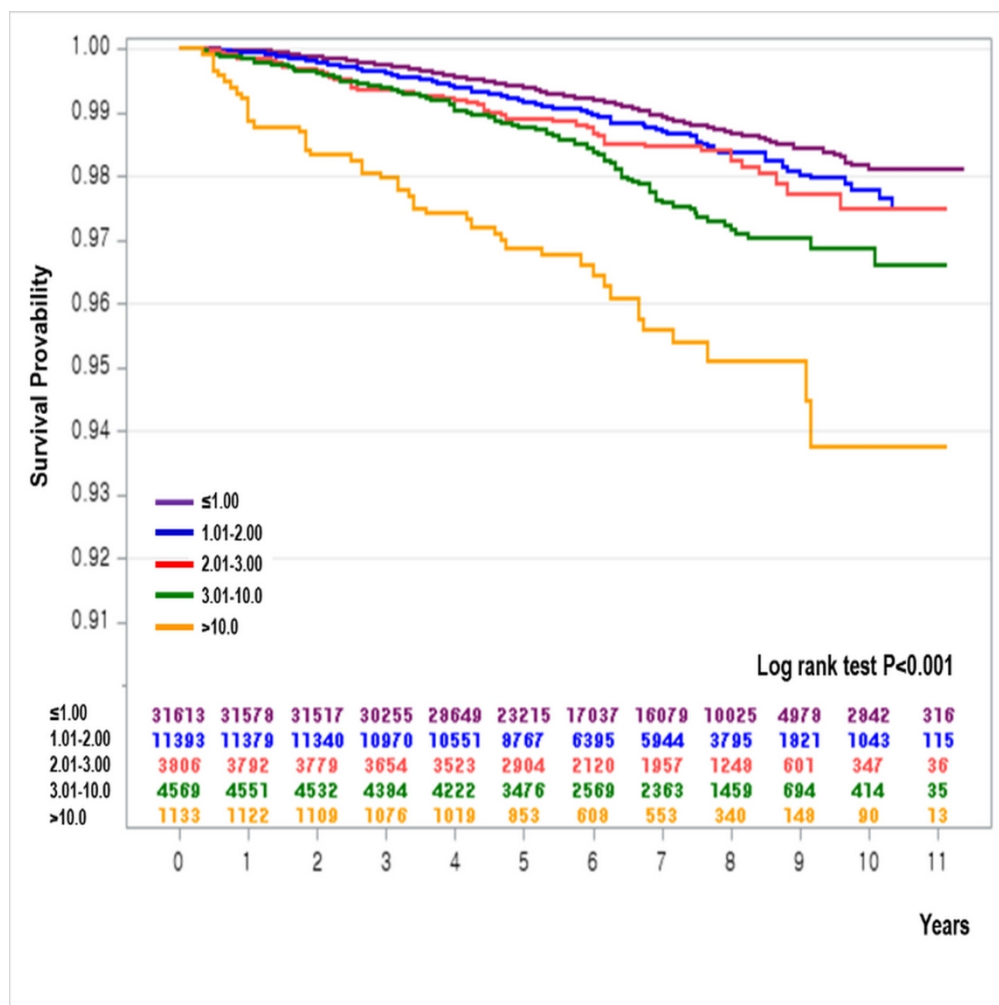

Figure 3 (e) Kaplan-Meier crude survival curves for cancer-mortality according to serum hsCRP level in subjects with non-communicable disease history (NCDhistory) at recruitment.

1  
2  
3  
4  
5  
6  
7  
8  
9  
10  
11  
12  
13  
14  
15  
16  
17  
18  
19  
20  
21  
22  
23  
24  
25  
26  
27  
28  
29  
30  
31  
32  
33  
34  
35  
36  
37  
38  
39  
40  
41  
42  
43  
44  
45  
46  
47  
48  
49  
50  
51  
52  
53  
54  
55  
56  
57  
58  
59  
60

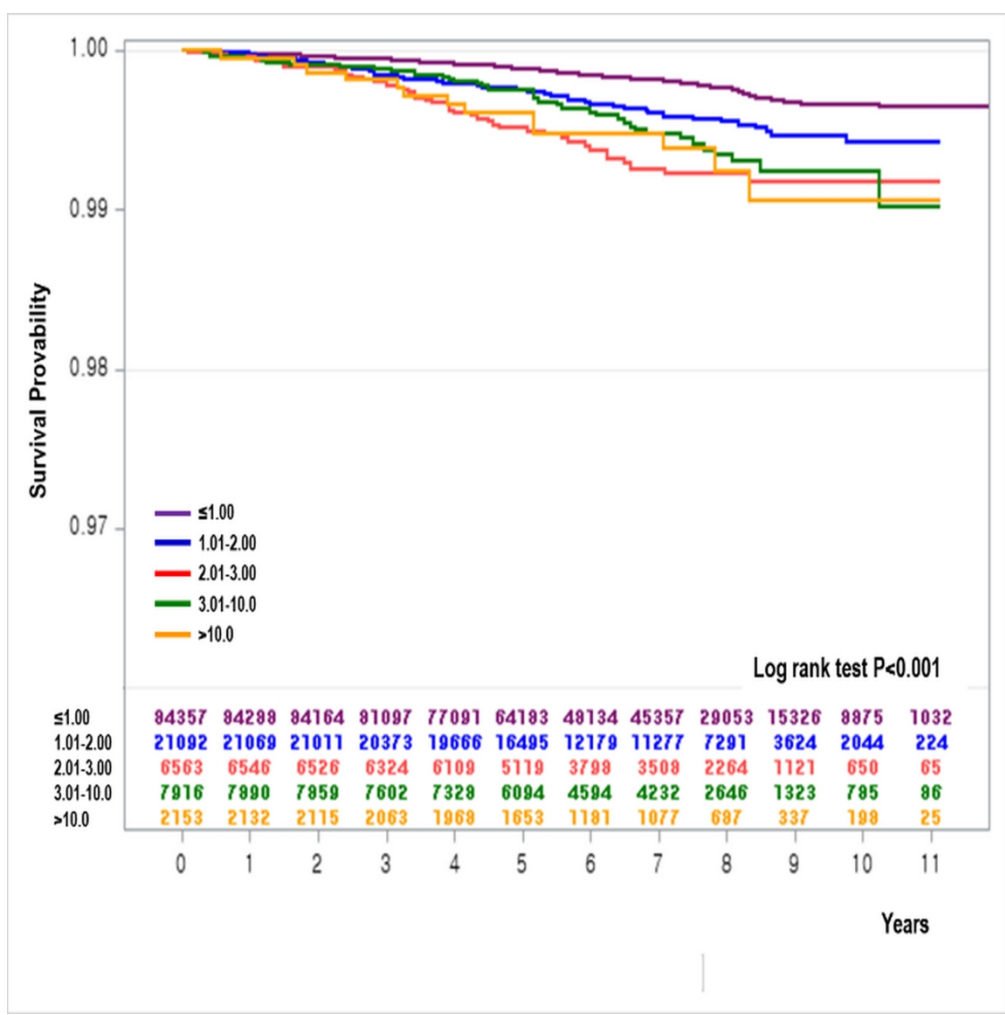

Figure 4 (a) Kaplan-Meier crude survival curves for cardiovascular disease mortality according to serum hsCRP level in all subjects at recruitment.



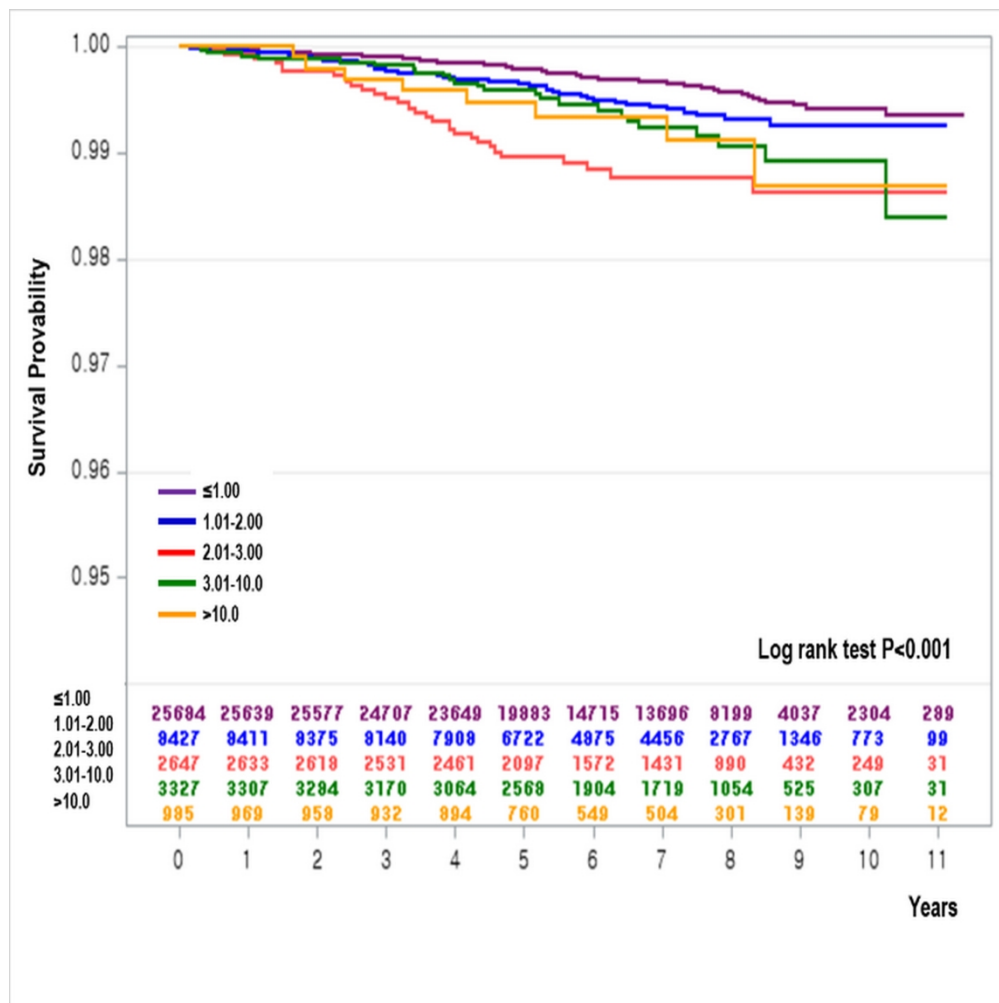

Figure 4 (b) Kaplan-Meier crude survival curves for cardiovascular disease mortality according to serum hsCRP level in men at recruitment.

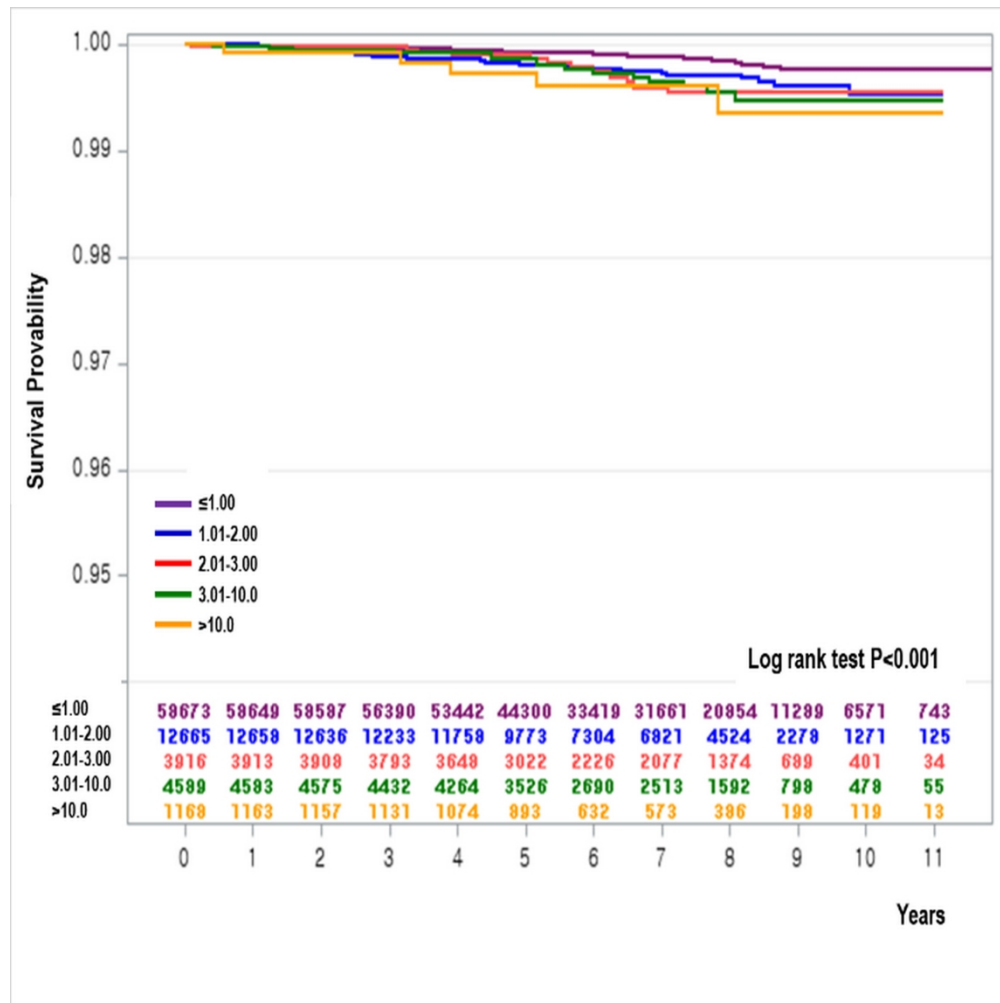

Figure 4 (c) Kaplan-Meier crude survival curves for cardiovascular disease mortality according to serum hsCRP level in women at recruitment.

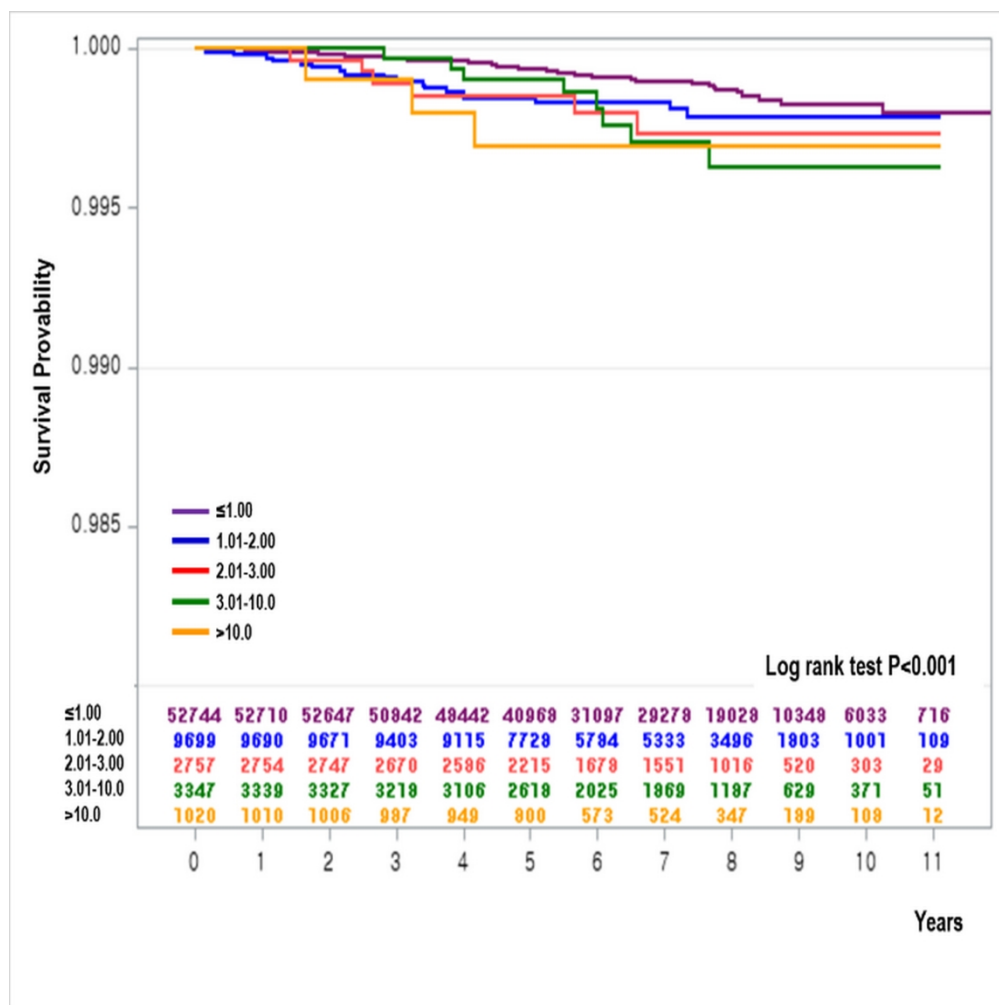

Figure 4 (d) Kaplan-Meier crude survival curves for cardiovascular disease mortality according to serum hsCRP level in healthy subjects at recruitment.

1  
2  
3  
4  
5  
6  
7  
8  
9  
10  
11  
12  
13  
14  
15  
16  
17  
18  
19  
20  
21  
22  
23  
24  
25  
26  
27  
28  
29  
30  
31  
32  
33  
34  
35  
36  
37  
38  
39  
40  
41  
42  
43  
44  
45  
46  
47  
48  
49  
50  
51  
52  
53  
54  
55  
56  
57  
58  
59  
60

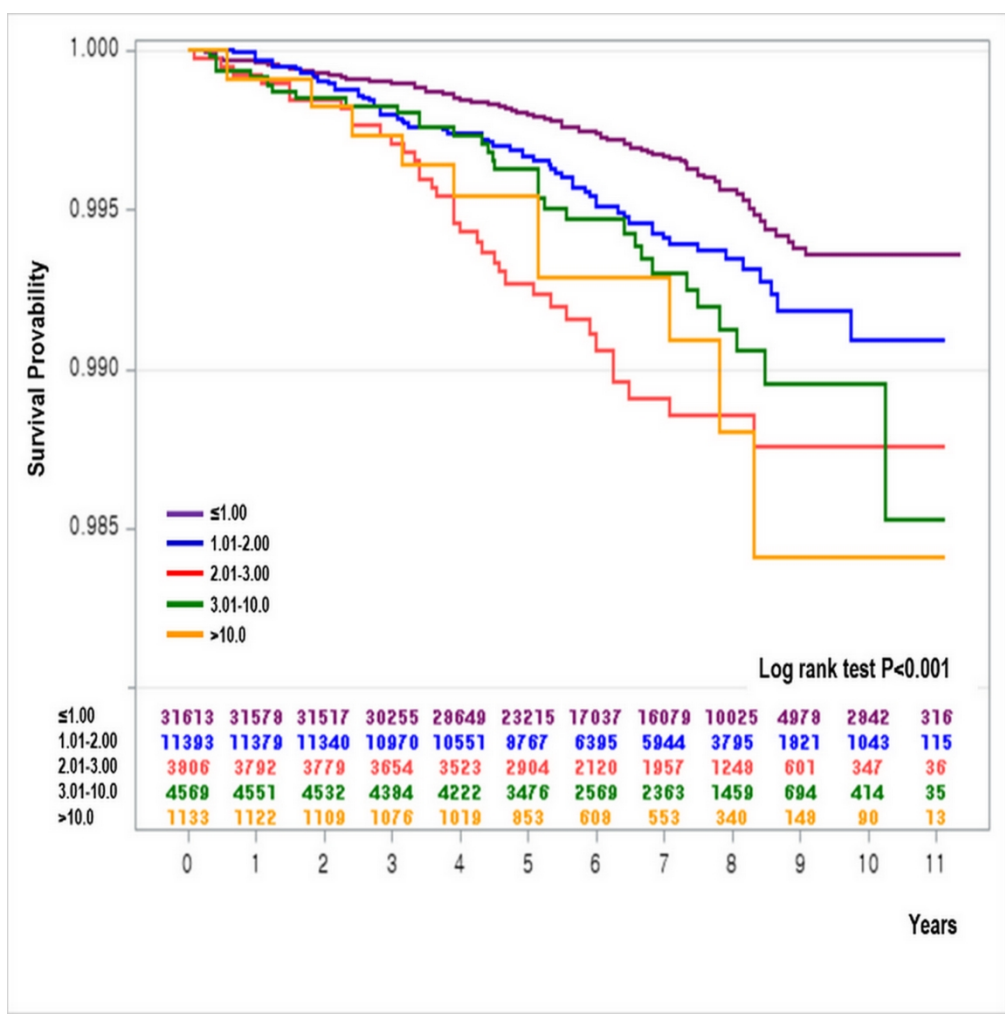

Figure 4 (e) Kaplan-Meier crude survival curves for cardiovascular disease mortality according to serum hsCRP level in subjects with non-communicable disease history (NCDhistory) at recruitment.

**Supplement 1.** The association of serum *hsCRP* level with the risk of all-cause mortality

|                       | PY      | E    | MR    | aHR                 | HR <sub>1year</sub> | HR <sub>2year</sub> |
|-----------------------|---------|------|-------|---------------------|---------------------|---------------------|
| <b>All subjects</b>   |         |      |       |                     |                     |                     |
| Continuous            | 781 035 | 2229 | 28.5  | 1.017 (1.012-1.021) | 1.015 (1.010-1.020) | 1.014 (1.009-1.019) |
| ≤1.00                 | 539 271 | 1153 | 21.4  | Reference           | Reference           | Reference           |
| 1.01-1.50             | 90 911  | 308  | 33.9  | 1.26 (1.10-1.45)    | 1.27 (1.10-1.45)    | 1.21 (1.04-1.40)    |
| 1.51-2.00             | 44 615  | 163  | 36.5  | 1.28 (1.08-1.53)    | 1.28 (1.07-1.53)    | 1.26 (1.04-1.52)    |
| 2.01-2.50             | 25 139  | 117  | 46.5  | 1.53 (1.25-1.89)    | 1.51 (1.22-1.87)    | 1.49 (1.19-1.87)    |
| 2.51-3.00             | 16 996  | 72   | 42.4  | 1.39 (1.08-1.80)    | 1.31 (1.00-1.72)    | 1.23 (0.92-1.65)    |
| 3.01-4.00             | 19 667  | 103  | 52.4  | 1.61 (1.29-2.01)    | 1.62 (1.29-2.03)    | 1.64 (1.30-2.08)    |
| 4.01-6.00             | 17 933  | 102  | 56.9  | 1.84 (1.48-2.28)    | 1.77 (1.41-2.21)    | 1.70 (1.34-2.16)    |
| 6.01-10.00            | 13 019  | 88   | 67.6  | 2.02 (1.59-2.56)    | 1.96 (1.54-2.50)    | 1.93 (1.49-2.51)    |
| >10.0                 | 13 484  | 123  | 91.2  | 2.59 (2.12-3.16)    | 2.41 (1.95-2.97)    | 2.26 (1.80-2.84)    |
| <i>P</i> -trend       |         |      |       | <.001               | <.001               | <.001               |
| <b>Men</b>            |         |      |       |                     |                     |                     |
| Continuous            | 261 321 | 1365 | 52.2  | 1.019 (1.014-1.025) | 1.017 (1.011-1.023) | 1.017 (1.010-1.023) |
| ≤1.00                 | 163 068 | 638  | 39.1  | Reference           | Reference           | Reference           |
| 1.01-1.50             | 36 094  | 190  | 52.6  | 1.27 (1.07-1.51)    | 1.28 (1.07-1.53)    | 1.22 (1.01-1.47)    |
| 1.51-2.00             | 17 946  | 103  | 57.4  | 1.34 (1.07-1.67)    | 1.34 (1.07-1.68)    | 1.35 (1.06-1.72)    |
| 2.01-2.50             | 10 059  | 77   | 76.5  | 1.56 (1.20-2.03)    | 1.53 (1.16-2.00)    | 1.47 (1.10-1.96)    |
| 2.51-3.00             | 6959    | 54   | 77.6  | 1.71 (1.27-2.29)    | 1.57 (1.15-2.15)    | 1.46 (1.04-2.05)    |
| 3.01-4.00             | 8177    | 77   | 94.2  | 1.88 (1.45-2.43)    | 1.94 (1.50-2.52)    | 1.92 (1.46-2.54)    |
| 4.01-6.00             | 7425    | 75   | 101.0 | 2.05 (1.59-2.63)    | 1.95 (1.49-2.53)    | 1.91 (1.44-2.52)    |
| 6.01-10.00            | 5456    | 59   | 108.1 | 2.03 (1.52-2.73)    | 1.96 (1.44-2.66)    | 1.85 (1.33-2.58)    |
| >10.0                 | 6137    | 92   | 149.9 | 2.84 (2.25-3.58)    | 2.66 (2.08-3.39)    | 2.58 (1.99-3.35)    |
| <i>P</i> -trend       |         |      |       | <.001               | <.001               | <.001               |
| <b>Women</b>          |         |      |       |                     |                     |                     |
| Continuous            | 519 714 | 864  | 16.6  | 1.013 (1.004-1.021) | 1.011(1.002-1.021)  | 1.010 (0.999-1.021) |
| ≤1.00                 | 376 203 | 515  | 13.7  | Reference           | Reference           | Reference           |
| 1.01-1.50             | 54 817  | 118  | 21.5  | 1.28 (1.03-1.59)    | 1.27 (1.02-1.58)    | 1.23 (0.97-1.56)    |
| 1.51-2.00             | 26 669  | 60   | 22.5  | 1.23 (0.92-1.64)    | 1.21 (0.90-1.63)    | 1.14 (0.83-1.56)    |
| 2.01-2.50             | 15 080  | 40   | 26.5  | 1.52 (1.09-2.14)    | 1.52 (1.08-2.15)    | 1.56 (1.09-2.24)    |
| 2.51-3.00             | 10 037  | 18   | 17.9  | 0.84 (0.49-1.44)    | 0.87 (0.51-1.48)    | 0.83 (0.46-1.47)    |
| 3.01-4.00             | 11 490  | 26   | 22.6  | 1.16 (0.75-1.81)    | 1.09 (0.68-1.72)    | 1.21 (0.76-1.93)    |
| 4.01-6.00             | 10 508  | 27   | 25.7  | 1.48 (0.99-2.22)    | 1.47 (0.97-2.22)    | 1.36 (0.86-2.14)    |
| 6.01-10.00            | 7563    | 29   | 38.3  | 2.00 (1.34-2.98)    | 1.98 (1.32-2.98)    | 2.10 (1.39-3.19)    |
| >10.0                 | 7347    | 31   | 42.2  | 2.02 (1.36-3.02)    | 1.84 (1.21-2.81)    | 1.51 (0.93-2.47)    |
| <i>P</i> -trend       |         |      |       | <.001               | <.001               | 0.001               |
| <b>Pre-menopause</b>  |         |      |       |                     |                     |                     |
| ≤1.00                 | 141 286 | 96   | 6.8   |                     |                     |                     |
| 1.01-2.00             | 20 500  | 20   | 9.8   | 1.52 (0.92-2.52)    | 1.49 (0.89-2.50)    | 1.57 (0.90-2.73)    |
| 2.01-3.00             | 5835    | 6    | 10.3  | 1.76 (0.77-4.06)    | 1.83 (0.79-4.22)    | 1.42 (0.52-3.93)    |
| 3.01-10.0             | 6886    | 6    | 8.7   | 1.51 (0.66-3.50)    | 1.31 (0.53-3.25)    | 1.21 (0.44-3.36)    |
| >10.0                 | 1759    | 4    | 22.7  | 2.57 (0.81-8.14)    | 2.63 (0.83-8.37)    | 2.09 (0.51-8.58)    |
| <i>P</i> -trend       |         |      |       | 0.020               | 0.036               | 0.150               |
| <b>Post-menopause</b> |         |      |       |                     |                     |                     |
| ≤1.00                 | 192 164 | 366  | 19.0  |                     |                     |                     |
| 1.01-2.00             | 52 897  | 145  | 27.4  | 1.26 (1.03-1.55)    | 1.25 (1.02-1.54)    | 1.18 (0.95-1.48)    |
| 2.01-3.00             | 16 943  | 44   | 26.0  | 1.11 (0.80-1.56)    | 1.12 (0.80-1.57)    | 1.19 (0.83-1.68)    |
| 3.01-10.0             | 19 687  | 67   | 34.0  | 1.49 (1.13-1.97)    | 1.47 (1.10-1.95)    | 1.52 (1.13-2.05)    |
| >10.0                 | 4828    | 27   | 55.9  | 2.09 (1.37-3.21)    | 1.88 (1.19-2.96)    | 1.56 (0.92-2.63)    |
| <i>P</i> -trend       |         |      |       | <0.001              | 0.001               | 0.003               |

PY: Person-year, E: Number of death, MR: Mortality rate (10,000 person year)

aHR: Adjusted for age, gender, education, job, marital status, BMI, non-communicable disease history, smoking, alcohol consumption and exercise

HR<sub>1year</sub>: aHR after exclude subjects who died within 1 yr f/u time

HR<sub>2year</sub>: aHR after exclude subjects who died within 2 yr f/u time

For peer review only

**Supplement 2.** The association between serum *hsCRP* level and all-cause mortality by gender and non-communicable disease history (NCD<sub>history</sub>) at recruitment

|                 | Healthy subjects at recruitment |       |       |                     |                     | Subjects with NCD <sub>history</sub> at recruitment |       |       |                     |                     |
|-----------------|---------------------------------|-------|-------|---------------------|---------------------|-----------------------------------------------------|-------|-------|---------------------|---------------------|
|                 | E                               | MR    | aHR   | HR <sub>1year</sub> | HR <sub>2year</sub> | E                                                   | MR    | aHR   | HR <sub>1year</sub> | HR <sub>2year</sub> |
| All             |                                 |       |       |                     |                     |                                                     |       |       |                     |                     |
| ≤ 1.00          | 517                             | 15.1  | Ref   | Ref                 | Ref                 | 636                                                 | 32.3  | Ref   | Ref                 | Ref                 |
| 1.01-2.00       | 145                             | 22.9  | 1.20  | 1.19                | 1.16                | 326                                                 | 45.1  | 1.20  | 1.19                | 1.16                |
| 2.01-3.00       | 53                              | 29.3  | 1.38  | 1.37                | 1.32                | 136                                                 | 56.6  | 1.51  | 1.46                | 1.41                |
| 3.01-10.0       | 102                             | 46.8  | 2.22  | 2.15                | 2.15                | 191                                                 | 66.3  | 1.62  | 1.60                | 1.58                |
| >10.0           | 40                              | 61.3  | 2.38  | 2.23                | 2.27                | 83                                                  | 118.9 | 2.74  | 2.54                | 2.29                |
| <i>P</i> -trend |                                 |       | <.001 | <.001               | <.001               |                                                     |       | <.001 | <.001               | <.001               |
| Men             |                                 |       |       |                     |                     |                                                     |       |       |                     |                     |
| ≤ 1.00          | 270                             | 29.5  | Ref   | Ref                 | Ref                 | 368                                                 | 51.4  | Ref   | Ref                 | Ref                 |
| 1.01-2.00       | 89                              | 35.8  | 1.11  | 1.11                | 1.13                | 204                                                 | 70.0  | 1.40  | 1.41                | 1.33                |
| 2.01-3.00       | 33                              | 46.3  | 1.22  | 1.17                | 1.15                | 98                                                  | 99.0  | 1.82  | 1.73                | 1.61                |
| 3.01-10.0       | 70                              | 76.8  | 2.14  | 2.08                | 2.03                | 141                                                 | 118.1 | 1.92  | 1.90                | 1.83                |
| >10.0           | 31                              | 110.0 | 2.60  | 2.49                | 2.73                | 61                                                  | 183.1 | 3.05  | 2.83                | 2.58                |
| <i>P</i> -trend |                                 |       | <.001 | <.001               | <.001               |                                                     |       | <.001 | <.001               | <.001               |
| Women           |                                 |       |       |                     |                     |                                                     |       |       |                     |                     |
| ≤ 1.00          | 247                             | 9.8   | Ref   | Ref                 | Ref                 | 268                                                 | 21.4  | Ref   | Ref                 | Ref                 |
| 1.01-2.00       | 56                              | 14.6  | 1.35  | 1.32                | 1.20                | 122                                                 | 28.3  | 1.19  | 1.20                | 1.19                |
| 2.01-3.00       | 20                              | 18.2  | 1.61  | 1.66                | 1.60                | 38                                                  | 26.9  | 1.06  | 1.06                | 1.11                |
| 3.01-10.0       | 32                              | 25.2  | 2.31  | 2.23                | 2.37                | 50                                                  | 29.7  | 1.16  | 1.14                | 1.17                |
| >10.0           | 9                               | 24.3  | 1.69  | 1.49                | 1.12                | 22                                                  | 60.3  | 2.15  | 1.99                | 1.68                |
| <i>P</i> -trend |                                 |       | <.001 | <.001               | 0.001               |                                                     |       | 0.018 | 0.043               | 0.084               |

E: Number of death, MR: Mortality rate (10 000 person year)

aHR: Adjusted for age, gender, education, job, marital status, BMI, non-communicable disease history, smoking, alcohol consumption and exercise

HR<sub>1year</sub>: aHR after exclude subjects who died within 1 yr f/u time

HR<sub>2year</sub>: aHR after exclude subjects who died within 2 yr f/u time

**STROBE 2007 (v4) checklist of items to be included in reports of observational studies in epidemiology\***  
**Checklist for cohort, case-control, and cross-sectional studies (combined)**

| Section/Topic             | Item # | Recommendation                                                                                                                                                                                                                                                                                                                                                                                                                                                         | Reported on page # |
|---------------------------|--------|------------------------------------------------------------------------------------------------------------------------------------------------------------------------------------------------------------------------------------------------------------------------------------------------------------------------------------------------------------------------------------------------------------------------------------------------------------------------|--------------------|
| <b>Title and abstract</b> | 1      | (a) Indicate the study's design with a commonly used term in the title or the abstract                                                                                                                                                                                                                                                                                                                                                                                 | 1                  |
|                           |        | (b) Provide in the abstract an informative and balanced summary of what was done and what was found                                                                                                                                                                                                                                                                                                                                                                    | 1-2                |
| Introduction              |        |                                                                                                                                                                                                                                                                                                                                                                                                                                                                        |                    |
| Background/rationale      | 2      | Explain the scientific background and rationale for the investigation being reported                                                                                                                                                                                                                                                                                                                                                                                   | 3                  |
| Objectives                | 3      | State specific objectives, including any pre-specified hypotheses                                                                                                                                                                                                                                                                                                                                                                                                      | 3                  |
| Methods                   |        |                                                                                                                                                                                                                                                                                                                                                                                                                                                                        |                    |
| Study design              | 4      | Present key elements of study design early in the paper                                                                                                                                                                                                                                                                                                                                                                                                                | 4                  |
| Setting                   | 5      | Describe the setting, locations, and relevant dates, including periods of recruitment, exposure, follow-up, and data collection                                                                                                                                                                                                                                                                                                                                        | 4-5                |
| Participants              | 6      | (a) <i>Cohort study</i> —Give the eligibility criteria, and the sources and methods of selection of participants. Describe methods of follow-up<br><i>Case-control study</i> —Give the eligibility criteria, and the sources and methods of case ascertainment and control selection. Give the rationale for the choice of cases and controls<br><i>Cross-sectional study</i> —Give the eligibility criteria, and the sources and methods of selection of participants | 4                  |
|                           |        | (b) <i>Cohort study</i> —For matched studies, give matching criteria and number of exposed and unexposed<br><i>Case-control study</i> —For matched studies, give matching criteria and the number of controls per case                                                                                                                                                                                                                                                 | Not Applicable     |
| Variables                 | 7      | Clearly define all outcomes, exposures, predictors, potential confounders, and effect modifiers. Give diagnostic criteria, if applicable                                                                                                                                                                                                                                                                                                                               | 5                  |
| Data sources/ measurement | 8*     | For each variable of interest, give sources of data and details of methods of assessment (measurement). Describe comparability of assessment methods if there is more than one group                                                                                                                                                                                                                                                                                   | 4-5                |
| Bias                      | 9      | Describe any efforts to address potential sources of bias                                                                                                                                                                                                                                                                                                                                                                                                              | 6                  |
| Study size                | 10     | Explain how the study size was arrived at                                                                                                                                                                                                                                                                                                                                                                                                                              | 4                  |
| Quantitative variables    | 11     | Explain how quantitative variables were handled in the analyses. If applicable, describe which groupings were chosen and why                                                                                                                                                                                                                                                                                                                                           | 5-6                |
| Statistical methods       | 12     | (a) Describe all statistical methods, including those used to control for confounding                                                                                                                                                                                                                                                                                                                                                                                  | 5-6                |
|                           |        | (b) Describe any methods used to examine subgroups and interactions                                                                                                                                                                                                                                                                                                                                                                                                    | 5-6                |
|                           |        | (c) Explain how missing data were addressed                                                                                                                                                                                                                                                                                                                                                                                                                            | 4                  |
|                           |        | (d) <i>Cohort study</i> —If applicable, explain how loss to follow-up was addressed<br><i>Case-control study</i> —If applicable, explain how matching of cases and controls was addressed                                                                                                                                                                                                                                                                              | 4                  |



|                          |     |                                                                                                                                                                                                              |                |
|--------------------------|-----|--------------------------------------------------------------------------------------------------------------------------------------------------------------------------------------------------------------|----------------|
|                          |     | <i>Cross-sectional study</i> —If applicable, describe analytical methods taking account of sampling strategy                                                                                                 |                |
|                          |     | (e) Describe any sensitivity analyses                                                                                                                                                                        | 6              |
| <b>Results</b>           |     |                                                                                                                                                                                                              |                |
| Participants             | 13* | (a) Report numbers of individuals at each stage of study—eg numbers potentially eligible, examined for eligibility, confirmed eligible, included in the study, completing follow-up, and analysed            | 4              |
|                          |     | (b) Give reasons for non-participation at each stage                                                                                                                                                         | 4              |
|                          |     | (c) Consider use of a flow diagram                                                                                                                                                                           | 4              |
| Descriptive data         | 14* | (a) Give characteristics of study participants (eg demographic, clinical, social) and information on exposures and potential confounders                                                                     | 6-7            |
|                          |     | (b) Indicate number of participants with missing data for each variable of interest                                                                                                                          | 4              |
|                          |     | (c) <i>Cohort study</i> —Summarise follow-up time (eg, average and total amount)                                                                                                                             | 6              |
| Outcome data             | 15* | <i>Cohort study</i> —Report numbers of outcome events or summary measures over time                                                                                                                          | 6-10           |
|                          |     | <i>Case-control study</i> —Report numbers in each exposure category, or summary measures of exposure                                                                                                         | Not Applicable |
|                          |     | <i>Cross-sectional study</i> —Report numbers of outcome events or summary measures                                                                                                                           | Not Applicable |
| Main results             | 16  | (a) Give unadjusted estimates and, if applicable, confounder-adjusted estimates and their precision (eg, 95% confidence interval). Make clear which confounders were adjusted for and why they were included | 7-11           |
|                          |     | (b) Report category boundaries when continuous variables were categorized                                                                                                                                    | 5              |
|                          |     | (c) If relevant, consider translating estimates of relative risk into absolute risk for a meaningful time period                                                                                             | Not Applicable |
| Other analyses           | 17  | Report other analyses done—eg analyses of subgroups and interactions, and sensitivity analyses                                                                                                               | 9              |
| <b>Discussion</b>        |     |                                                                                                                                                                                                              |                |
| Key results              | 18  | Summarise key results with reference to study objectives                                                                                                                                                     | 12             |
| Limitations              | 19  | Discuss limitations of the study, taking into account sources of potential bias or imprecision. Discuss both direction and magnitude of any potential bias                                                   | 14             |
| Interpretation           | 20  | Give a cautious overall interpretation of results considering objectives, limitations, multiplicity of analyses, results from similar studies, and other relevant evidence                                   | 12-14          |
| Generalisability         | 21  | Discuss the generalisability (external validity) of the study results                                                                                                                                        | 12-14          |
| <b>Other information</b> |     |                                                                                                                                                                                                              |                |
| Funding                  | 22  | Give the source of funding and the role of the funders for the present study and, if applicable, for the original study on which the present article is based                                                | 15             |

\*Give information separately for cases and controls in case-control studies and, if applicable, for exposed and unexposed groups in cohort and cross-sectional studies.

**Note:** An Explanation and Elaboration article discusses each checklist item and gives methodological background and published examples of transparent reporting. The STROBE checklist is best used in conjunction with this article (freely available on the Web sites of PLoS Medicine at <http://www.plosmedicine.org/>, Annals of Internal Medicine at <http://www.annals.org/>, and Epidemiology at <http://www.epidem.com/>). Information on the STROBE Initiative is available at [www.strobe-statement.org](http://www.strobe-statement.org).
