# Supplementary material for: Association of serum high-sensitivity C reactive protein with risk of mortality in an Asian population: the Health Examinees cohort
Source: HighWire-hosted journal article supplement (doi:10.1136/bmjopen-2021-052630), 2022-07-01
Supplement: bmjopen-2021-052630supp001_data_supplement.pdf [file bmjopen-2021-052630supp001_data_supplement.pdf]

**Supplement 1.** The association of serum *hsCRP* level with the risk of all-cause mortality

|                      | PY      | E    | MR    | aHR                 | HR <sub>1year</sub> | HR <sub>2year</sub> |
|----------------------|---------|------|-------|---------------------|---------------------|---------------------|
| <b>All subjects</b>  |         |      |       |                     |                     |                     |
| Continuous           | 781 035 | 2229 | 28.5  | 1.017 (1.012-1.021) | 1.015 (1.010-1.020) | 1.014 (1.009-1.019) |
| ≤1.00                | 539 271 | 1153 | 21.4  | Reference           | Reference           | Reference           |
| 1.01-1.50            | 90 911  | 308  | 33.9  | 1.26 (1.10-1.45)    | 1.27 (1.10-1.45)    | 1.21 (1.04-1.40)    |
| 1.51-2.00            | 44 615  | 163  | 36.5  | 1.28 (1.08-1.53)    | 1.28 (1.07-1.53)    | 1.26 (1.04-1.52)    |
| 2.01-2.50            | 25 139  | 117  | 46.5  | 1.53 (1.25-1.89)    | 1.51 (1.22-1.87)    | 1.49 (1.19-1.87)    |
| 2.51-3.00            | 16 996  | 72   | 42.4  | 1.39 (1.08-1.80)    | 1.31 (1.00-1.72)    | 1.23 (0.92-1.65)    |
| 3.01-4.00            | 19 667  | 103  | 52.4  | 1.61 (1.29-2.01)    | 1.62 (1.29-2.03)    | 1.64 (1.30-2.08)    |
| 4.01-6.00            | 17 933  | 102  | 56.9  | 1.84 (1.48-2.28)    | 1.77 (1.41-2.21)    | 1.70 (1.34-2.16)    |
| 6.01-10.00           | 13 019  | 88   | 67.6  | 2.02 (1.59-2.56)    | 1.96 (1.54-2.50)    | 1.93 (1.49-2.51)    |
| >10.0                | 13 484  | 123  | 91.2  | 2.59 (2.12-3.16)    | 2.41 (1.95-2.97)    | 2.26 (1.80-2.84)    |
| <i>P</i> -trend      |         |      |       | <.001               | <.001               | <.001               |
| <b>Men</b>           |         |      |       |                     |                     |                     |
| Continuous           | 261 321 | 1365 | 52.2  | 1.019 (1.014-1.025) | 1.017 (1.011-1.023) | 1.017 (1.010-1.023) |
| ≤1.00                | 163 068 | 638  | 39.1  | Reference           | Reference           | Reference           |
| 1.01-1.50            | 36 094  | 190  | 52.6  | 1.27 (1.07-1.51)    | 1.28 (1.07-1.53)    | 1.22 (1.01-1.47)    |
| 1.51-2.00            | 17 946  | 103  | 57.4  | 1.34 (1.07-1.67)    | 1.34 (1.07-1.68)    | 1.35 (1.06-1.72)    |
| 2.01-2.50            | 10 059  | 77   | 76.5  | 1.56 (1.20-2.03)    | 1.53 (1.16-2.00)    | 1.47 (1.10-1.96)    |
| 2.51-3.00            | 6959    | 54   | 77.6  | 1.71 (1.27-2.29)    | 1.57 (1.15-2.15)    | 1.46 (1.04-2.05)    |
| 3.01-4.00            | 8177    | 77   | 94.2  | 1.88 (1.45-2.43)    | 1.94 (1.50-2.52)    | 1.92 (1.46-2.54)    |
| 4.01-6.00            | 7425    | 75   | 101.0 | 2.05 (1.59-2.63)    | 1.95 (1.49-2.53)    | 1.91 (1.44-2.52)    |
| 6.01-10.00           | 5456    | 59   | 108.1 | 2.03 (1.52-2.73)    | 1.96 (1.44-2.66)    | 1.85 (1.33-2.58)    |
| >10.0                | 6137    | 92   | 149.9 | 2.84 (2.25-3.58)    | 2.66 (2.08-3.39)    | 2.58 (1.99-3.35)    |
| <i>P</i> -trend      |         |      |       | <.001               | <.001               | <.001               |
| <b>Women</b>         |         |      |       |                     |                     |                     |
| Continuous           | 519 714 | 864  | 16.6  | 1.013 (1.004-1.021) | 1.011(1.002-1.021)  | 1.010 (0.999-1.021) |
| ≤1.00                | 376 203 | 515  | 13.7  | Reference           | Reference           | Reference           |
| 1.01-1.50            | 54 817  | 118  | 21.5  | 1.28 (1.03-1.59)    | 1.27 (1.02-1.58)    | 1.23 (0.97-1.56)    |
| 1.51-2.00            | 26 669  | 60   | 22.5  | 1.23 (0.92-1.64)    | 1.21 (0.90-1.63)    | 1.14 (0.83-1.56)    |
| 2.01-2.50            | 15 080  | 40   | 26.5  | 1.52 (1.09-2.14)    | 1.52 (1.08-2.15)    | 1.56 (1.09-2.24)    |
| 2.51-3.00            | 10 037  | 18   | 17.9  | 0.84 (0.49-1.44)    | 0.87 (0.51-1.48)    | 0.83 (0.46-1.47)    |
| 3.01-4.00            | 11 490  | 26   | 22.6  | 1.16 (0.75-1.81)    | 1.09 (0.68-1.72)    | 1.21 (0.76-1.93)    |
| 4.01-6.00            | 10 508  | 27   | 25.7  | 1.48 (0.99-2.22)    | 1.47 (0.97-2.22)    | 1.36 (0.86-2.14)    |
| 6.01-10.00           | 7563    | 29   | 38.3  | 2.00 (1.34-2.98)    | 1.98 (1.32-2.98)    | 2.10 (1.39-3.19)    |
| >10.0                | 7347    | 31   | 42.2  | 2.02 (1.36-3.02)    | 1.84 (1.21-2.81)    | 1.51 (0.93-2.47)    |
| <i>P</i> -trend      |         |      |       | <.001               | <.001               | 0.001               |
| <b>Premenopause</b>  |         |      |       |                     |                     |                     |
| ≤1.00                | 141 286 | 96   | 6.8   |                     |                     |                     |
| 1.01-2.00            | 20 500  | 20   | 9.8   | 1.52 (0.92-2.52)    | 1.49 (0.89-2.50)    | 1.57 (0.90-2.73)    |
| 2.01-3.00            | 5835    | 6    | 10.3  | 1.76 (0.77-4.06)    | 1.83 (0.79-4.22)    | 1.42 (0.52-3.93)    |
| 3.01-10.0            | 6886    | 6    | 8.7   | 1.51 (0.66-3.50)    | 1.31 (0.53-3.25)    | 1.21 (0.44-3.36)    |
| >10.0                | 1759    | 4    | 22.7  | 2.57 (0.81-8.14)    | 2.63 (0.83-8.37)    | 2.09 (0.51-8.58)    |
| <i>P</i> -trend      |         |      |       | 0.020               | 0.036               | 0.150               |
| <b>Postmenopause</b> |         |      |       |                     |                     |                     |
| ≤1.00                | 192 164 | 366  | 19.0  |                     |                     |                     |
| 1.01-2.00            | 52 897  | 145  | 27.4  | 1.26 (1.03-1.55)    | 1.25 (1.02-1.54)    | 1.18 (0.95-1.48)    |
| 2.01-3.00            | 16 943  | 44   | 26.0  | 1.11 (0.80-1.56)    | 1.12 (0.80-1.57)    | 1.19 (0.83-1.68)    |
| 3.01-10.0            | 19 687  | 67   | 34.0  | 1.49 (1.13-1.97)    | 1.47 (1.10-1.95)    | 1.52 (1.13-2.05)    |
| >10.0                | 4828    | 27   | 55.9  | 2.09 (1.37-3.21)    | 1.88 (1.19-2.96)    | 1.56 (0.92-2.63)    |
| <i>P</i> -trend      |         |      |       | <0.001              | 0.001               | 0.003               |

PY: Person-year, E: Number of death, MR: Mortality rate (10,000 person year)

aHR: Adjusted for age, gender, education, job, marital status, BMI, non-communicable disease history, smoking, alcohol consumption and exercise

HR<sub>1year</sub>: aHR after exclude subjects who died within 1 yr f/u time

HR<sub>2year</sub>: aHR after exclude subjects who died within 2 yr f/u time

**Supplement 2.** The association between serum *hsCRP* level and all-cause mortality by gender and non-communicable disease history (NCD<sub>history</sub>) at recruitment

|                 | Healthy subjects at recruitment |       |       |                     |                     | Subjects with NCD <sub>history</sub> at recruitment |       |       |                     |                     |
|-----------------|---------------------------------|-------|-------|---------------------|---------------------|-----------------------------------------------------|-------|-------|---------------------|---------------------|
|                 | E                               | MR    | aHR   | HR <sub>1year</sub> | HR <sub>2year</sub> | E                                                   | MR    | aHR   | HR <sub>1year</sub> | HR <sub>2year</sub> |
| All             |                                 |       |       |                     |                     |                                                     |       |       |                     |                     |
| ≤ 1.00          | 517                             | 15.1  | Ref   | Ref                 | Ref                 | 636                                                 | 32.3  | Ref   | Ref                 | Ref                 |
| 1.01-2.00       | 145                             | 22.9  | 1.20  | 1.19                | 1.16                | 326                                                 | 45.1  | 1.20  | 1.19                | 1.16                |
| 2.01-3.00       | 53                              | 29.3  | 1.38  | 1.37                | 1.32                | 136                                                 | 56.6  | 1.51  | 1.46                | 1.41                |
| 3.01-10.0       | 102                             | 46.8  | 2.22  | 2.15                | 2.15                | 191                                                 | 66.3  | 1.62  | 1.60                | 1.58                |
| >10.0           | 40                              | 61.3  | 2.38  | 2.23                | 2.27                | 83                                                  | 118.9 | 2.74  | 2.54                | 2.29                |
| <i>P</i> -trend |                                 |       | <.001 | <.001               | <.001               |                                                     |       | <.001 | <.001               | <.001               |
| Men             |                                 |       |       |                     |                     |                                                     |       |       |                     |                     |
| ≤ 1.00          | 270                             | 29.5  | Ref   | Ref                 | Ref                 | 368                                                 | 51.4  | Ref   | Ref                 | Ref                 |
| 1.01-2.00       | 89                              | 35.8  | 1.11  | 1.11                | 1.13                | 204                                                 | 70.0  | 1.40  | 1.41                | 1.33                |
| 2.01-3.00       | 33                              | 46.3  | 1.22  | 1.17                | 1.15                | 98                                                  | 99.0  | 1.82  | 1.73                | 1.61                |
| 3.01-10.0       | 70                              | 76.8  | 2.14  | 2.08                | 2.03                | 141                                                 | 118.1 | 1.92  | 1.90                | 1.83                |
| >10.0           | 31                              | 110.0 | 2.60  | 2.49                | 2.73                | 61                                                  | 183.1 | 3.05  | 2.83                | 2.58                |
| <i>P</i> -trend |                                 |       | <.001 | <.001               | <.001               |                                                     |       | <.001 | <.001               | <.001               |
| Women           |                                 |       |       |                     |                     |                                                     |       |       |                     |                     |
| ≤ 1.00          | 247                             | 9.8   | Ref   | Ref                 | Ref                 | 268                                                 | 21.4  | Ref   | Ref                 | Ref                 |
| 1.01-2.00       | 56                              | 14.6  | 1.35  | 1.32                | 1.20                | 122                                                 | 28.3  | 1.19  | 1.20                | 1.19                |
| 2.01-3.00       | 20                              | 18.2  | 1.61  | 1.66                | 1.60                | 38                                                  | 26.9  | 1.06  | 1.06                | 1.11                |
| 3.01-10.0       | 32                              | 25.2  | 2.31  | 2.23                | 2.37                | 50                                                  | 29.7  | 1.16  | 1.14                | 1.17                |
| >10.0           | 9                               | 24.3  | 1.69  | 1.49                | 1.12                | 22                                                  | 60.3  | 2.15  | 1.99                | 1.68                |
| <i>P</i> -trend |                                 |       | <.001 | <.001               | 0.001               |                                                     |       | 0.018 | 0.043               | 0.084               |

E: Number of death, MR: Mortality rate (10 000 person year)

aHR: Adjusted for age, gender, education, job, marital status, BMI, non-communicable disease history, smoking, alcohol consumption and exercise

HR<sub>1year</sub>: aHR after exclude subjects who died within 1 yr f/u timeHR<sub>2year</sub>: aHR after exclude subjects who died within 2 yr f/u time
